# Supplementary material for: Cat–87 clinopyroxene: a new reference material for oxygen isotope microanalysis, with applicability tested across a range of Ca–Mg–Fe clinopyroxene compositions
Source: Royal Society of Chemistry journal article supplement (doi:10.1039/d5ja00412h), 2026-01-01
Supplement: d5ja00412h1.pdf [file d5ja00412h1.pdf]

# **Cat-87 clinopyroxene: a new reference material for oxygen isotope microanalysis, with applicability tested across a range of Ca–Mg–Fe clinopyroxene compositions**

A. Melnik, N. Korolev, Q.-L. Li, J. Li, G.-Q. Tang, L.-J. Feng,  
D. Müller, V.N. Zinchenko, and X.-H. Li

## **Supplementary Figures**

This file includes: Figures S1–S11

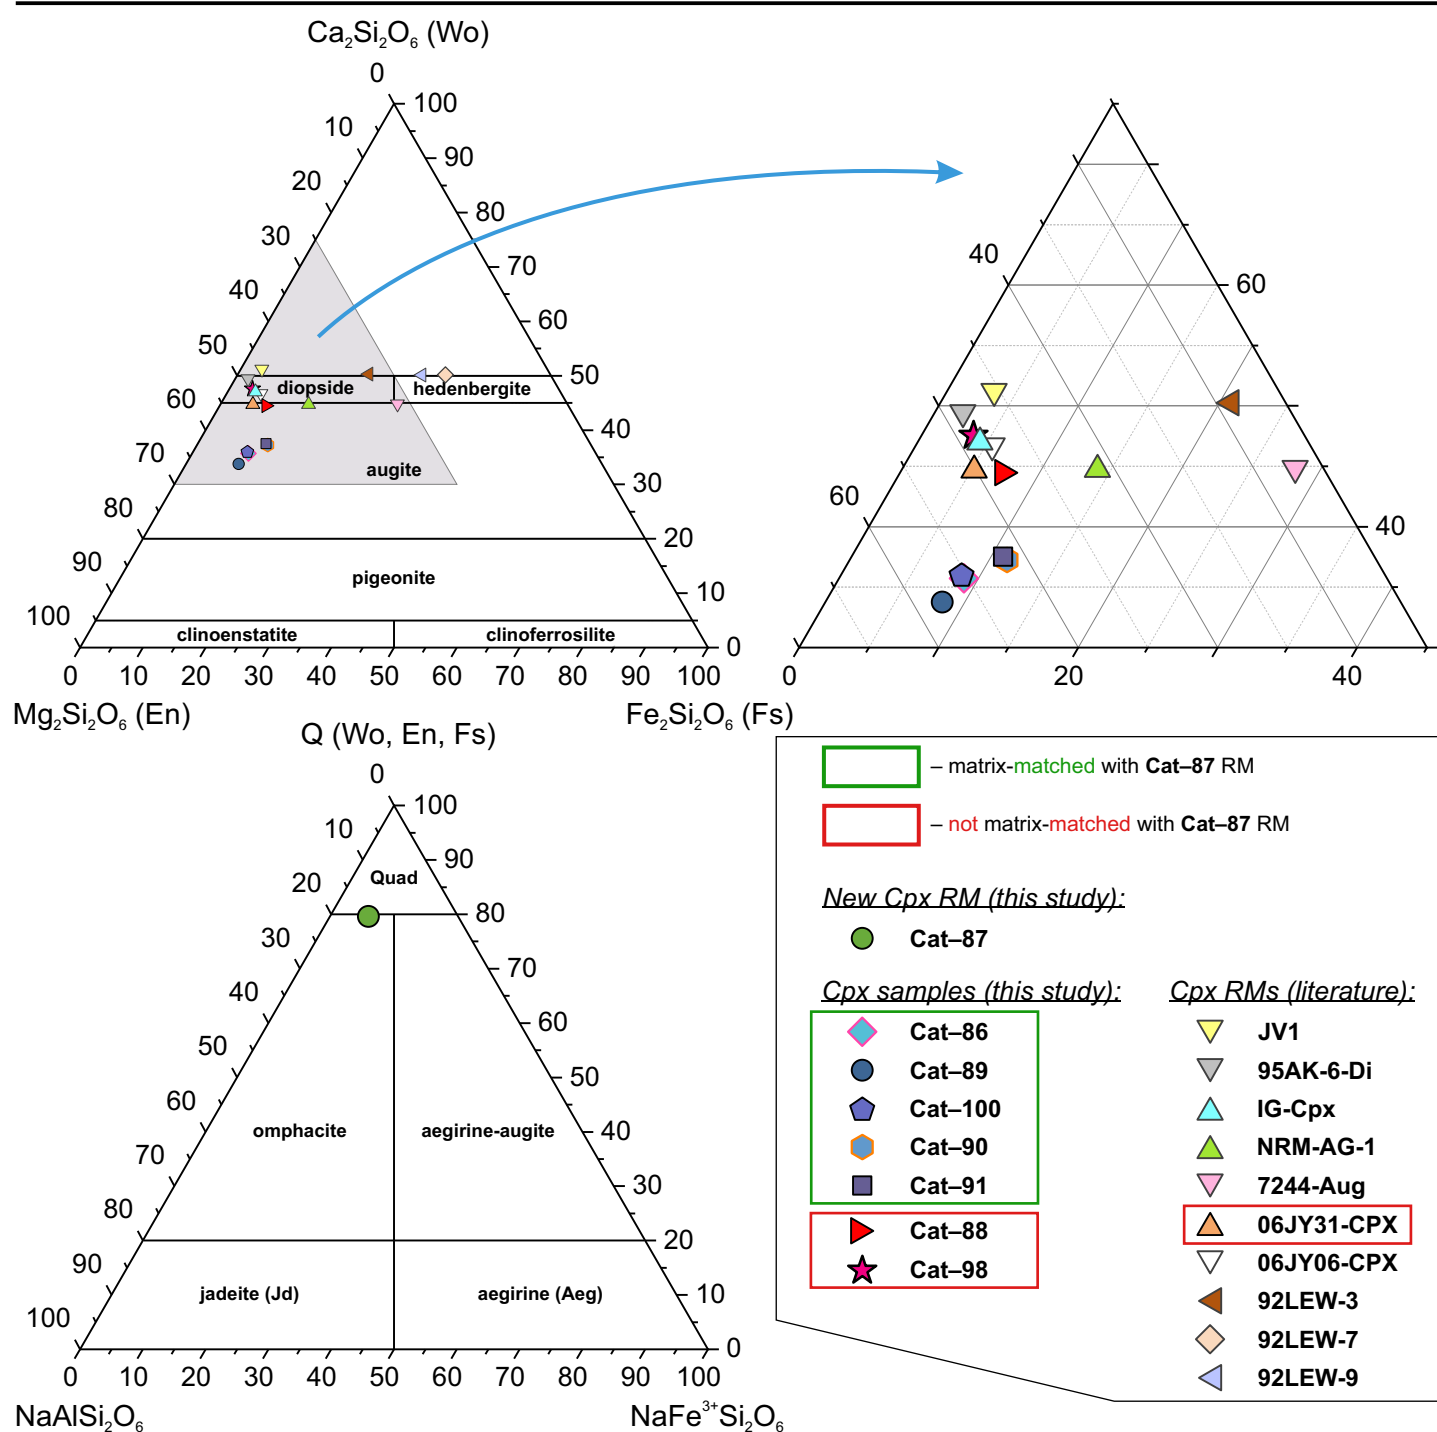

**Figure S1.** Classification diagrams for pyroxenes showing the average compositions of clinopyroxene (Cpx) samples from the Catoca kimberlite pipe (Fig. S2), together with previously published Cpx reference materials (RMs) used for O isotope microanalysis (references listed in Table 1). Pyroxene classification follows Morimoto<sup>10</sup> and chemical component calculations were performed using PX-NOM (Sturm<sup>22</sup>). Quad represents Ca–Mg–Fe pyroxenes.

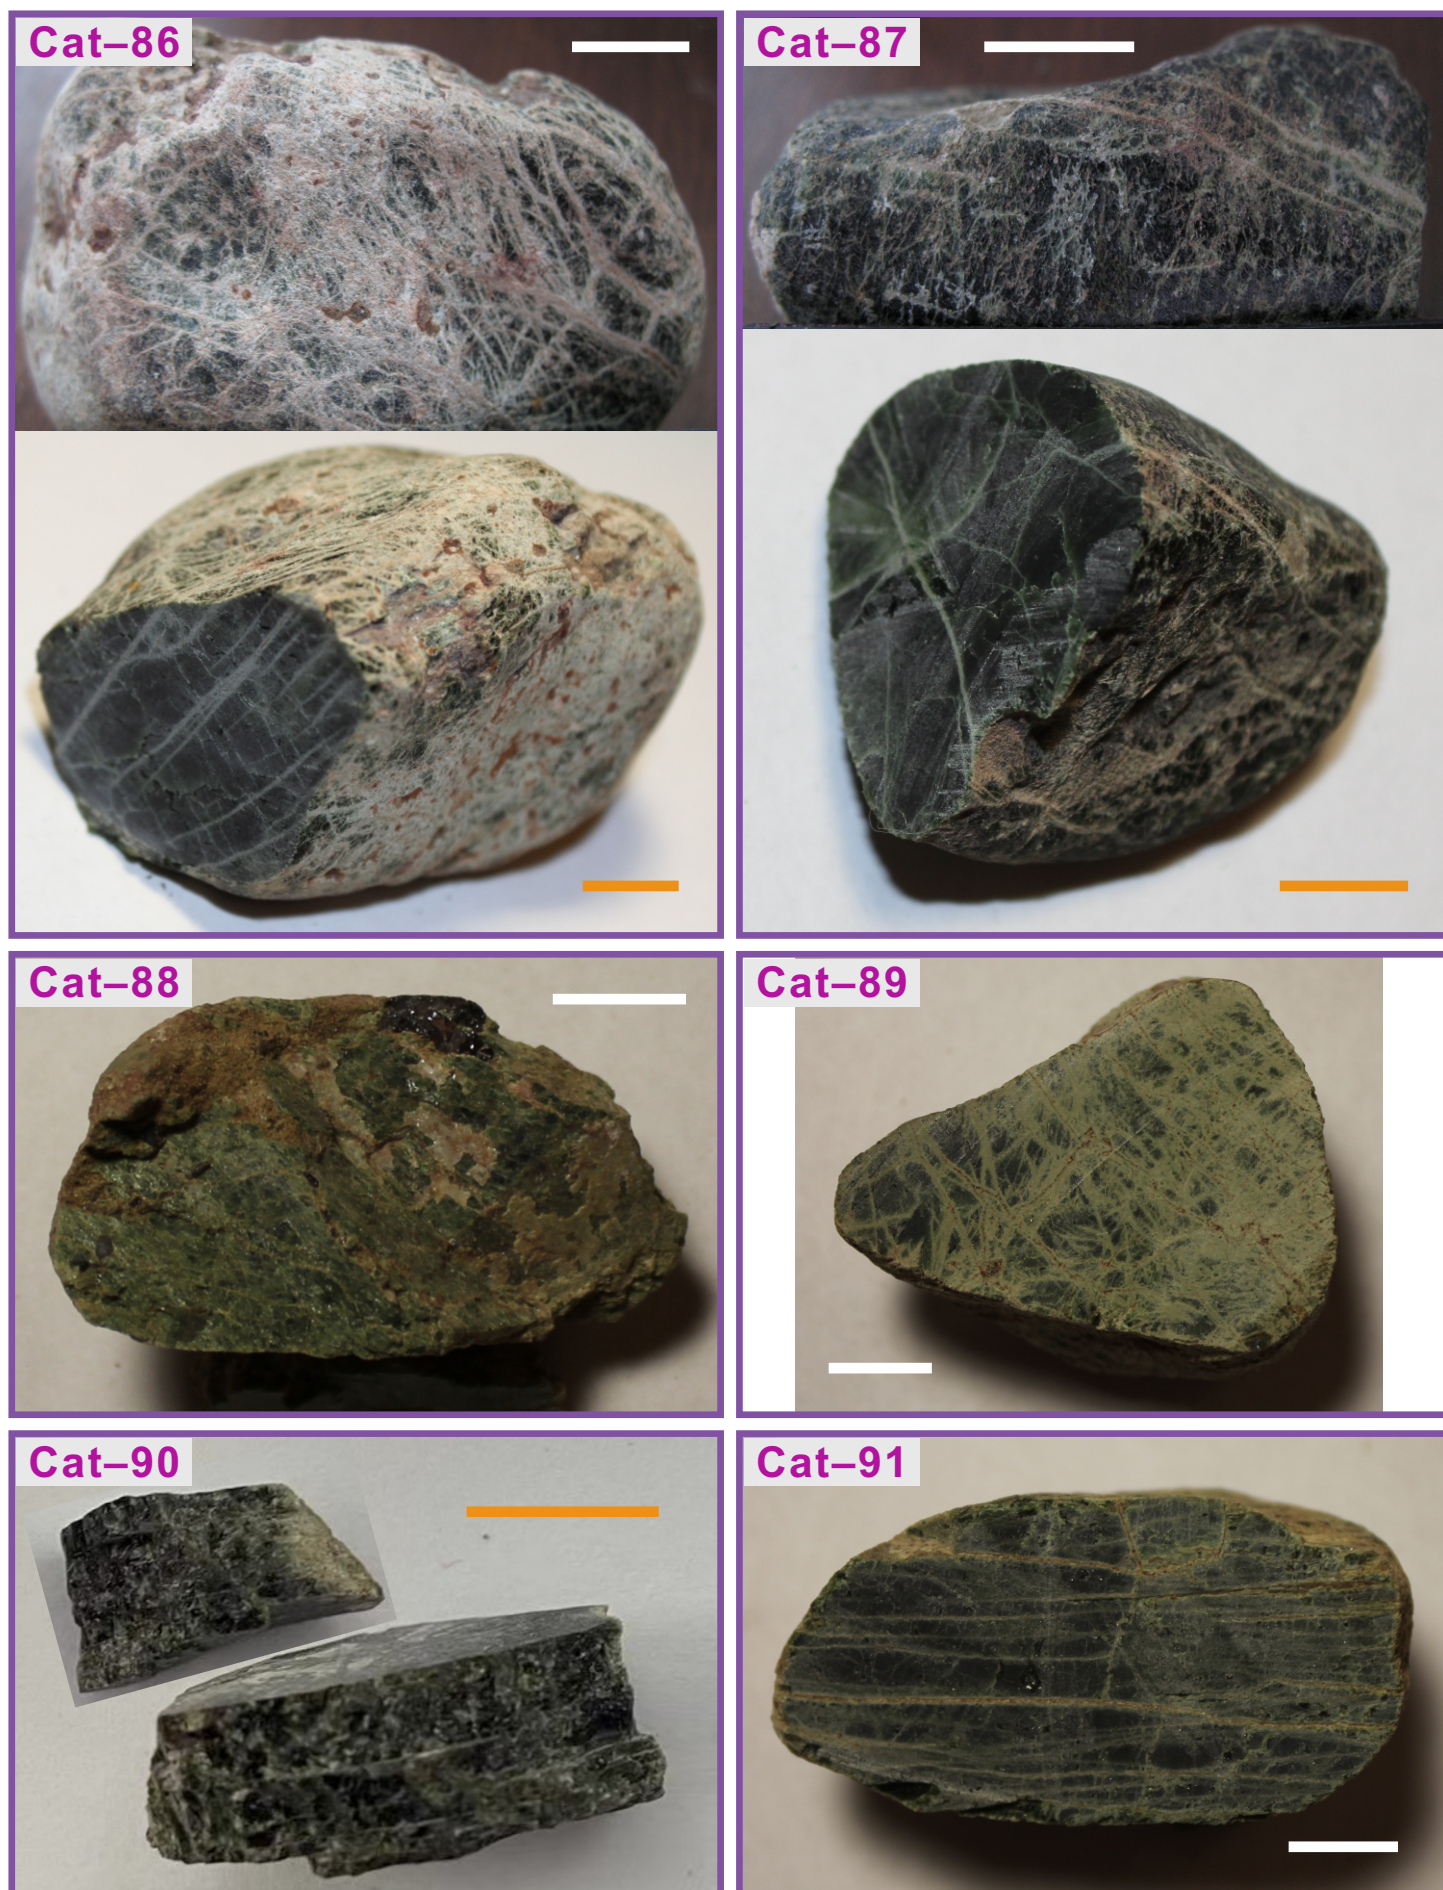

**Figure S2.** Photographs of clinopyroxene megacrysts and the Cat-98 xenolith from the Catoca kimberlite pipe. Scale bars represent 1 cm.



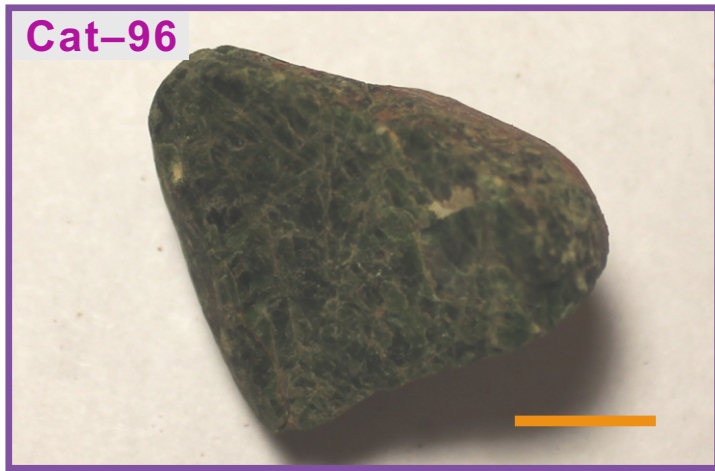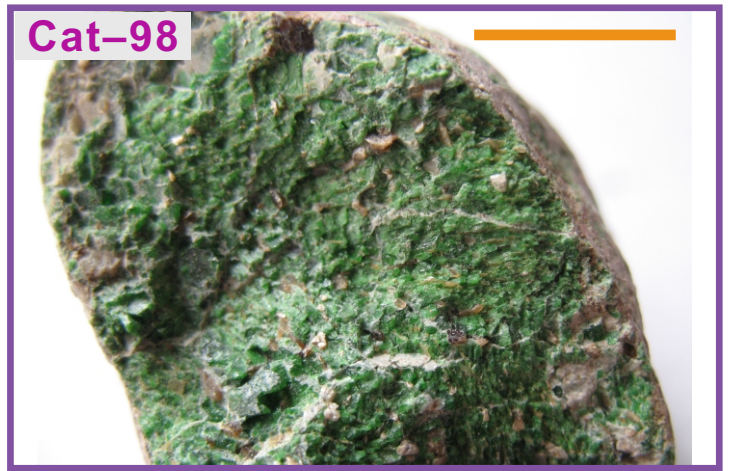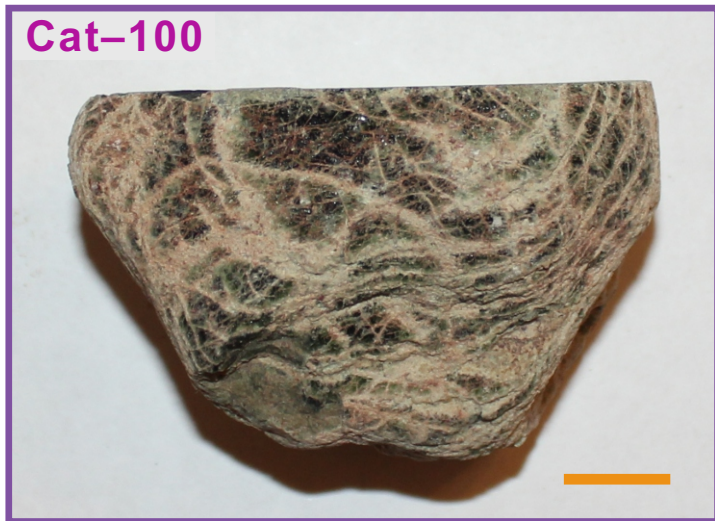

**Figure S2.** Continued.

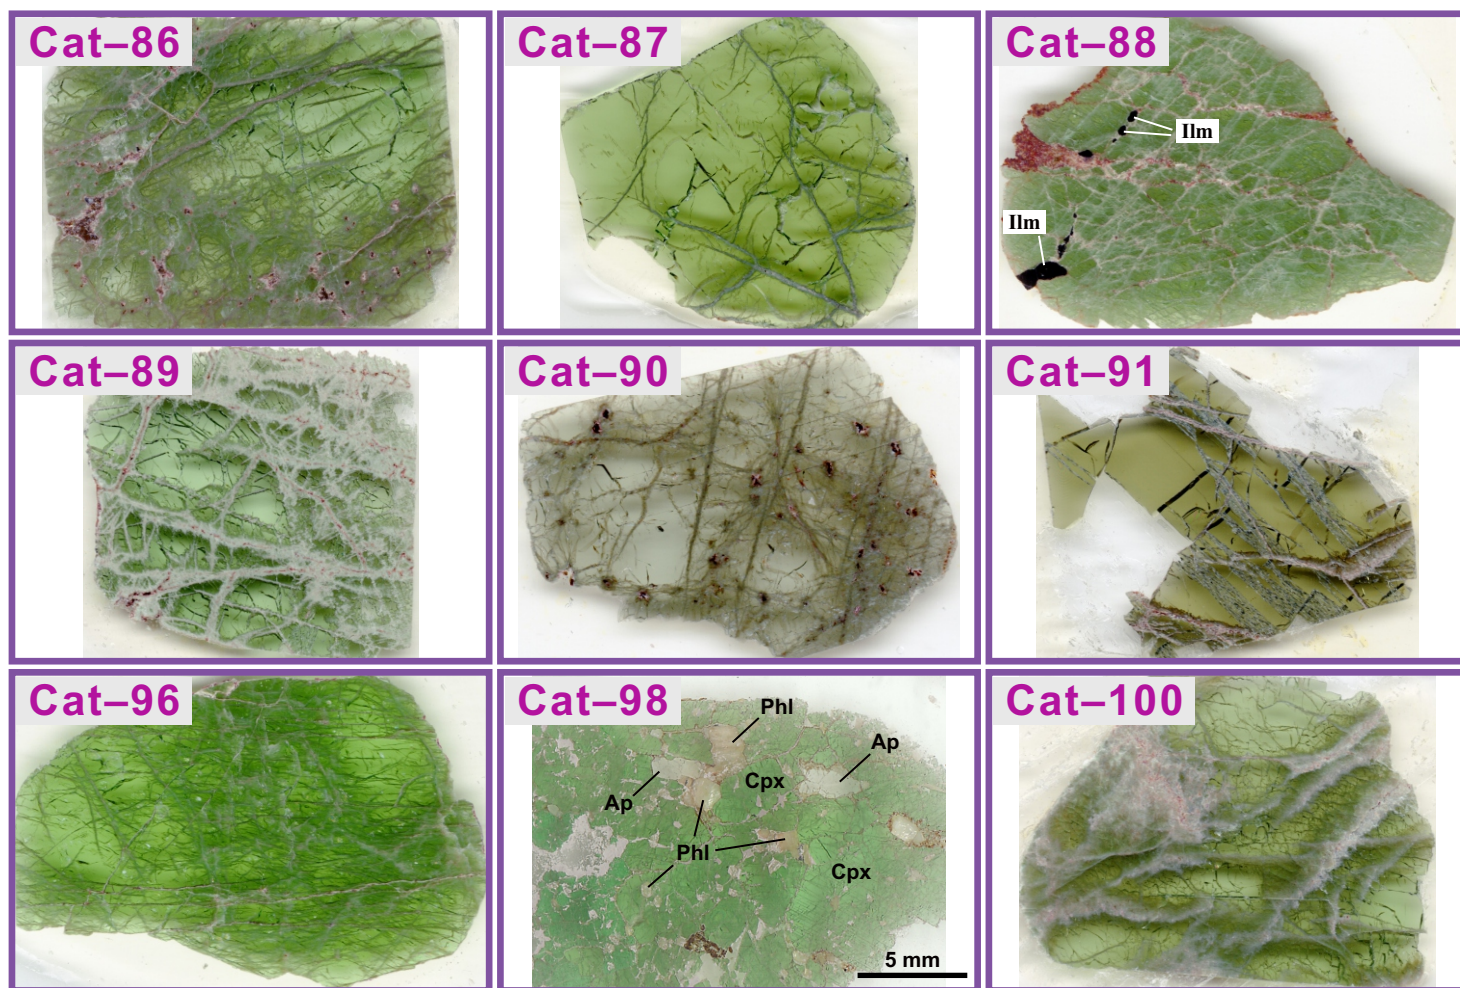

**Figure S3.** Thin sections of clinopyroxene megacrysts and the Cat-98 xenolith from the Catoca kimberlite pipe. The longest dimensions of the clinopyroxene megacryst sections range from 2.5 to 4 cm. Ap = apatite; Cpx = clinopyroxene; Phl = phlogopite; Ilm = ilmenite.

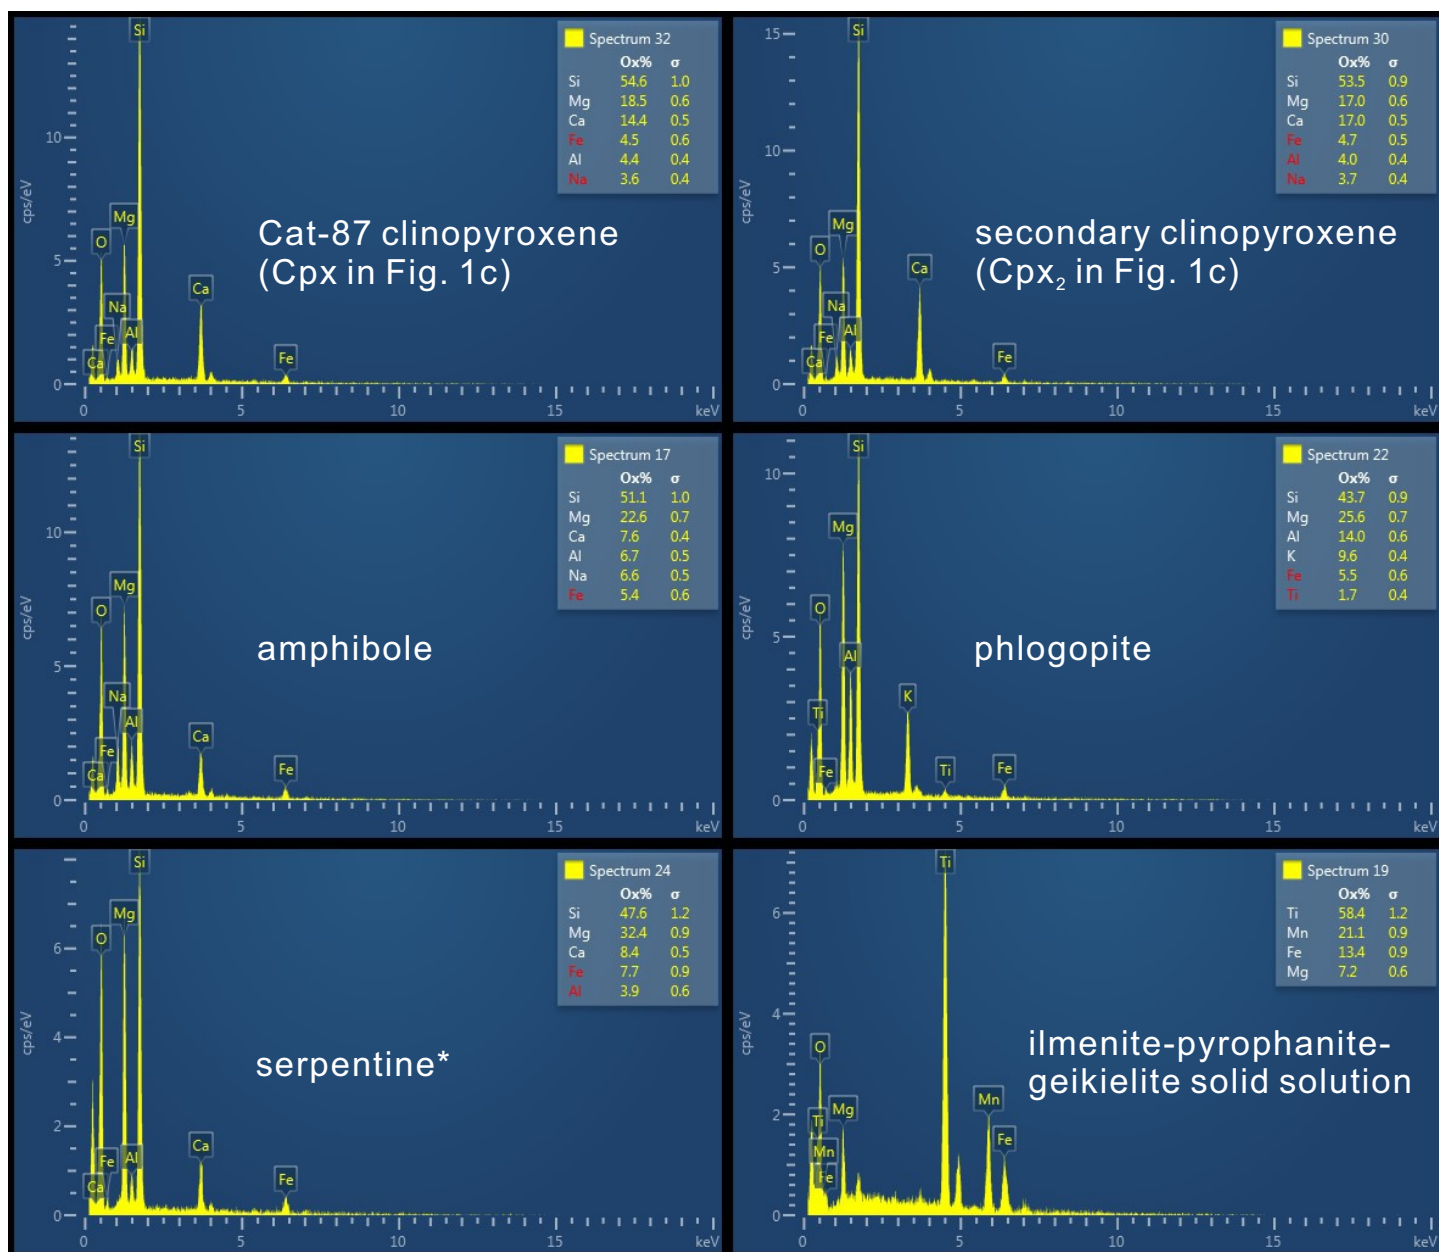

**Figure S4.** Representative EDS spectra for secondary minerals and the host Cat-87 clinopyroxene. \*The Ca peaks observed in the EDS spectrum of serpentine are due to the presence of clinopyroxene at the analyzed sites.



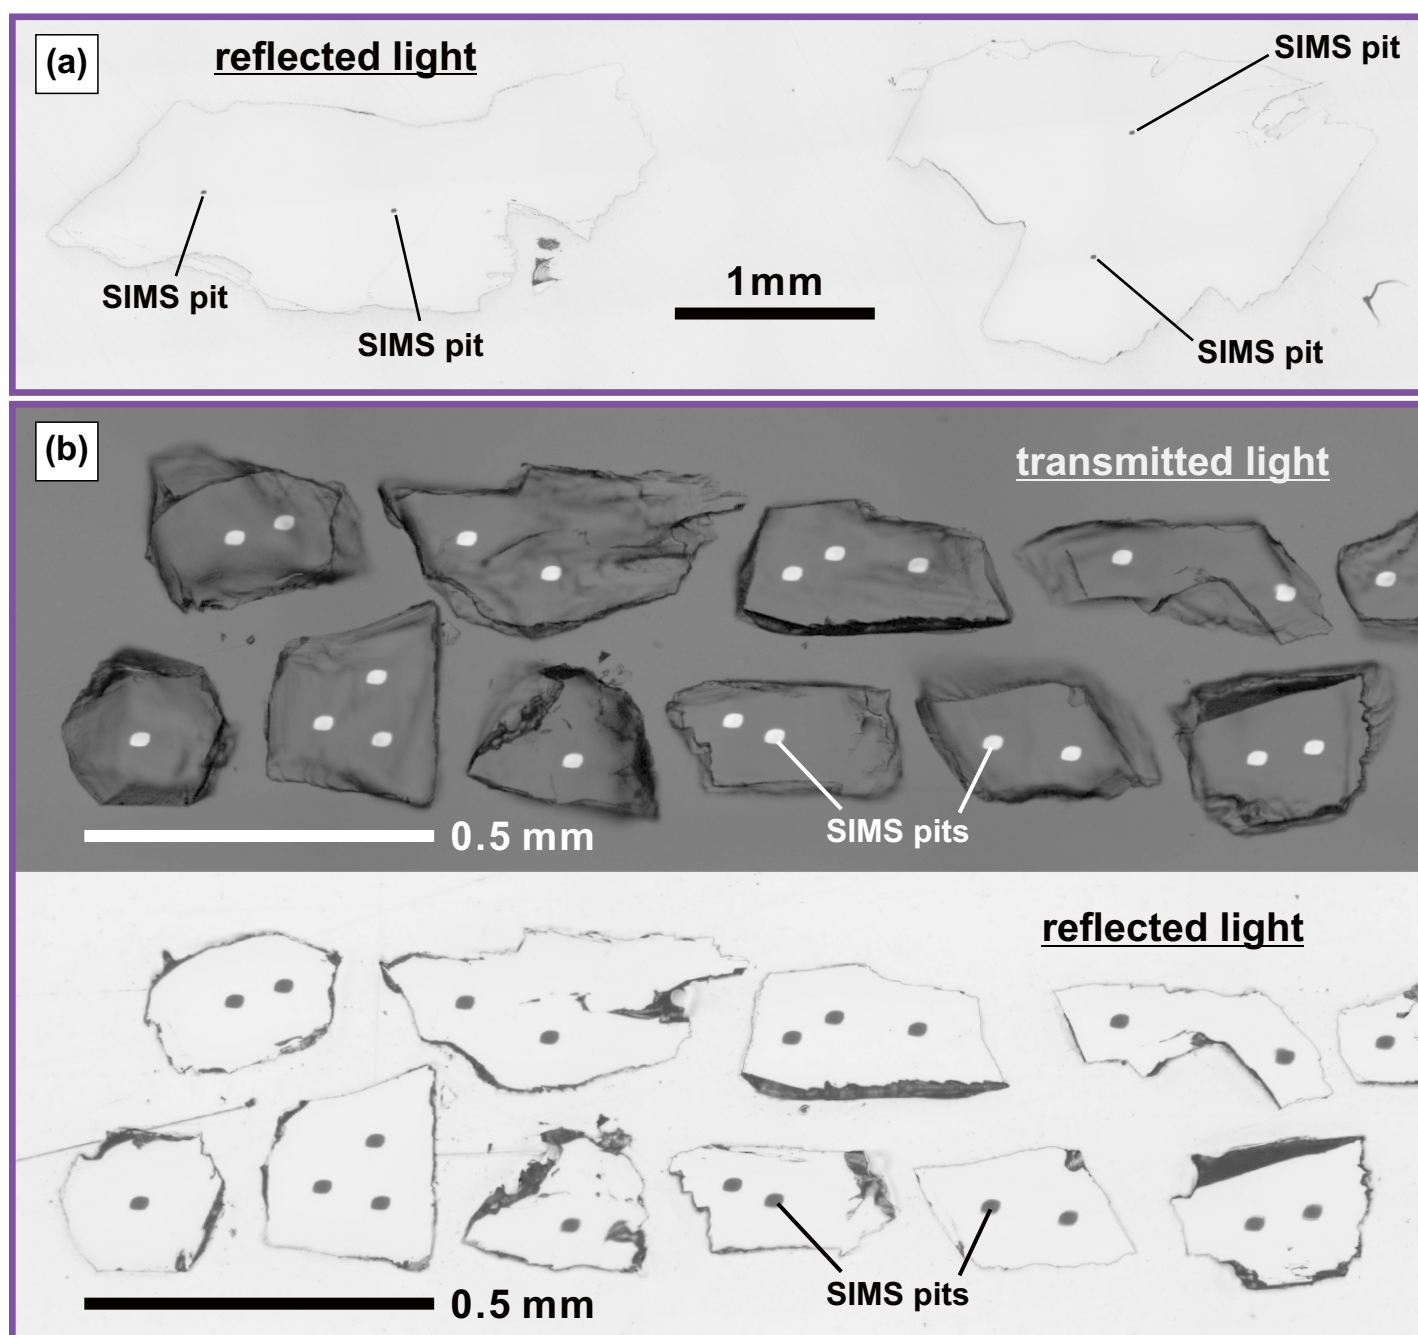

**Figure S5.** Transmitted and reflected light microphotographs of representative Cat-87 clinopyroxene fragments. **(a)** Selected fragments from mount A6573 analyzed for O isotopes and chemical composition. **(b)** Selected fragments from mount A6585 analyzed for O isotopes and chemical composition. All microphotographs were taken on gold-coated mounts after SIMS O isotope analysis; thus, SIMS pits are visible in all fragments shown in panels **(a)** and **(b)**.

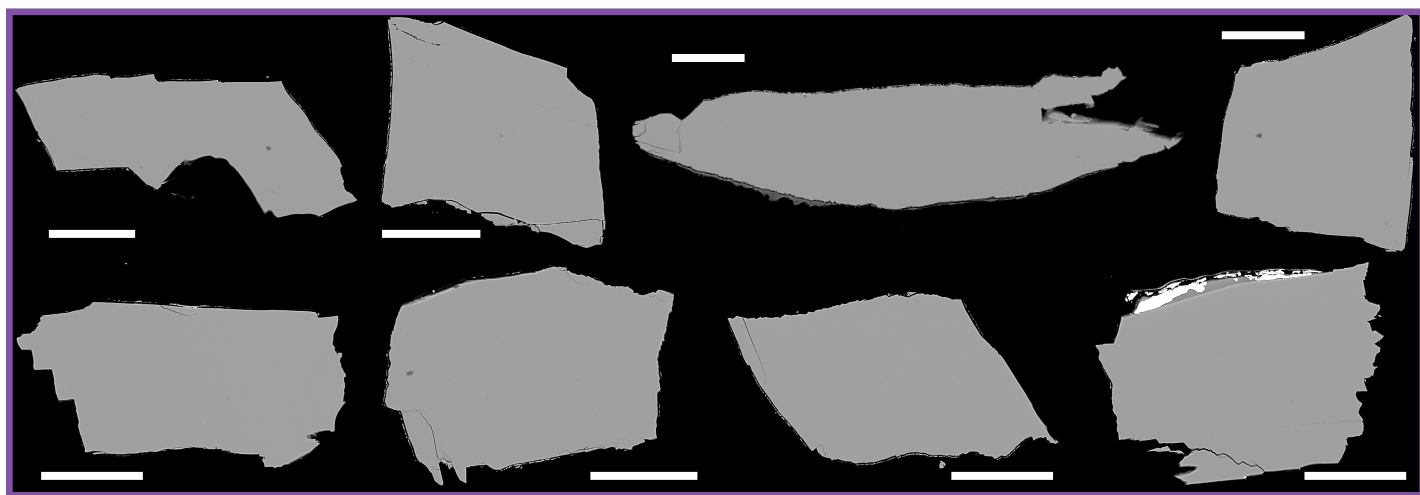

**Figure S6.** BSE images of representative Cat-87 clinopyroxene fragments in mount A6585. Scale bars represent 100  $\mu\text{m}$ .

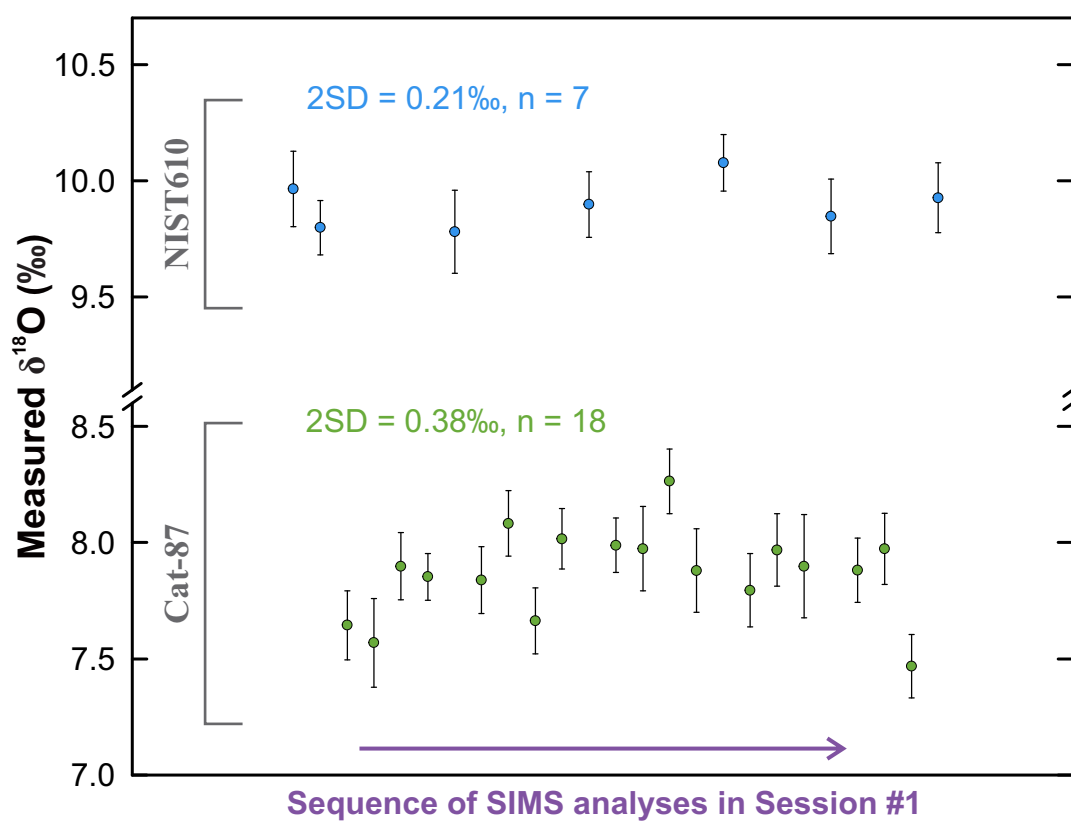

**Figure S7.** Temporal distribution plots of SIMS oxygen isotope analyses for Cat-87 clinopyroxene and NIST SRM 610 reference material in Session #1. Error bars represent  $\pm 2\text{SE}$ .

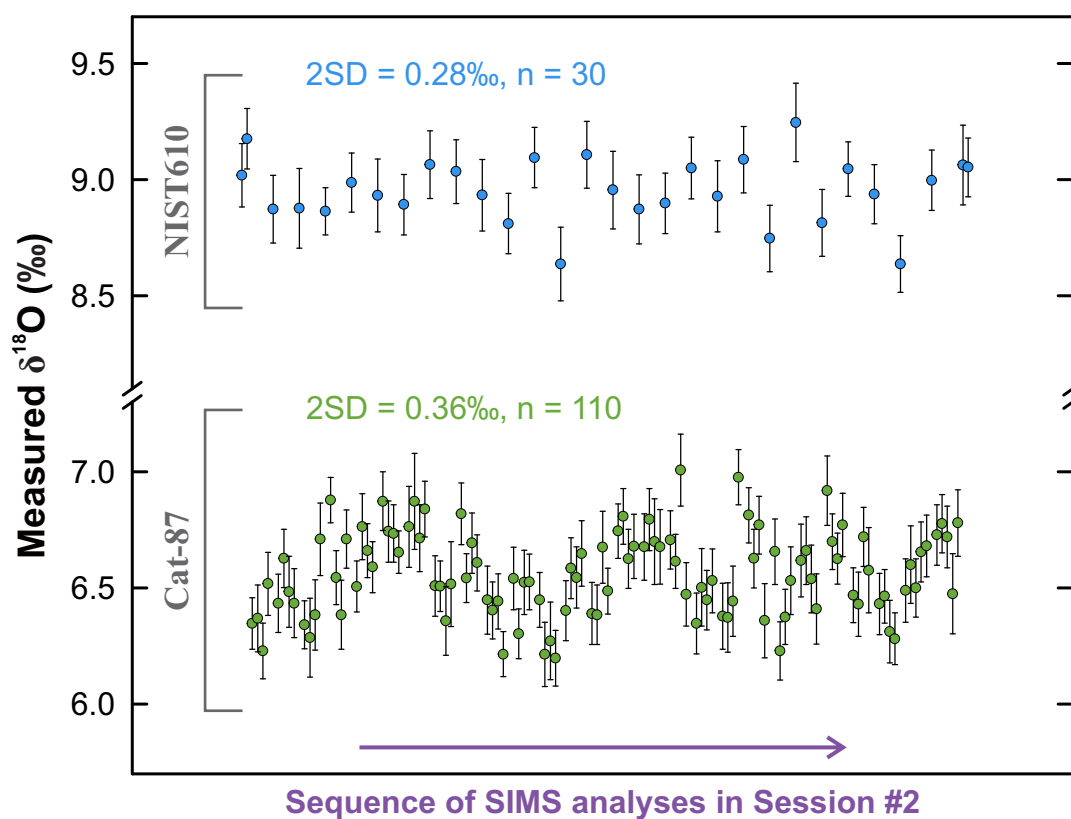

**Figure S8.** Temporal distribution plots of SIMS oxygen isotope analyses for Cat-87 clinopyroxene and NIST SRM 610 reference material in Session #2. Error bars represent  $\pm 2\text{SE}$ .

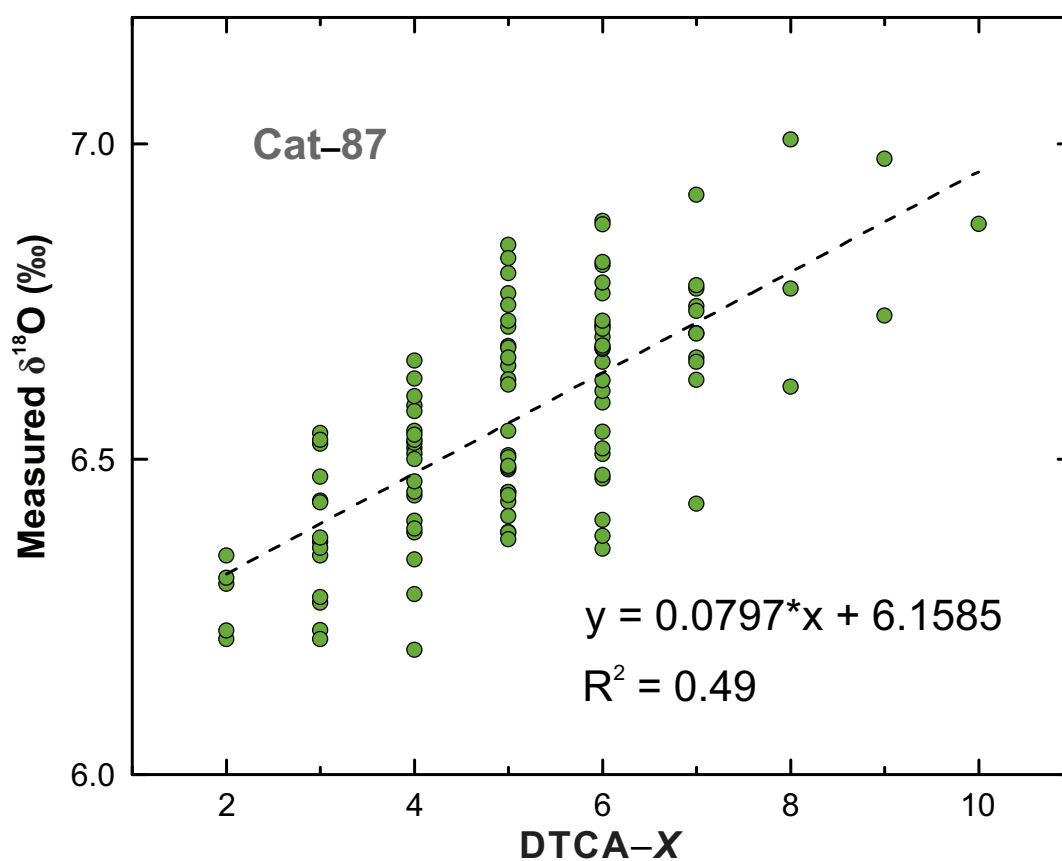

**Figure S9.** Relationship between DTCA-X and measured  $\delta^{18}\text{O}$  for Cat-87 clinopyroxene in Session #2.



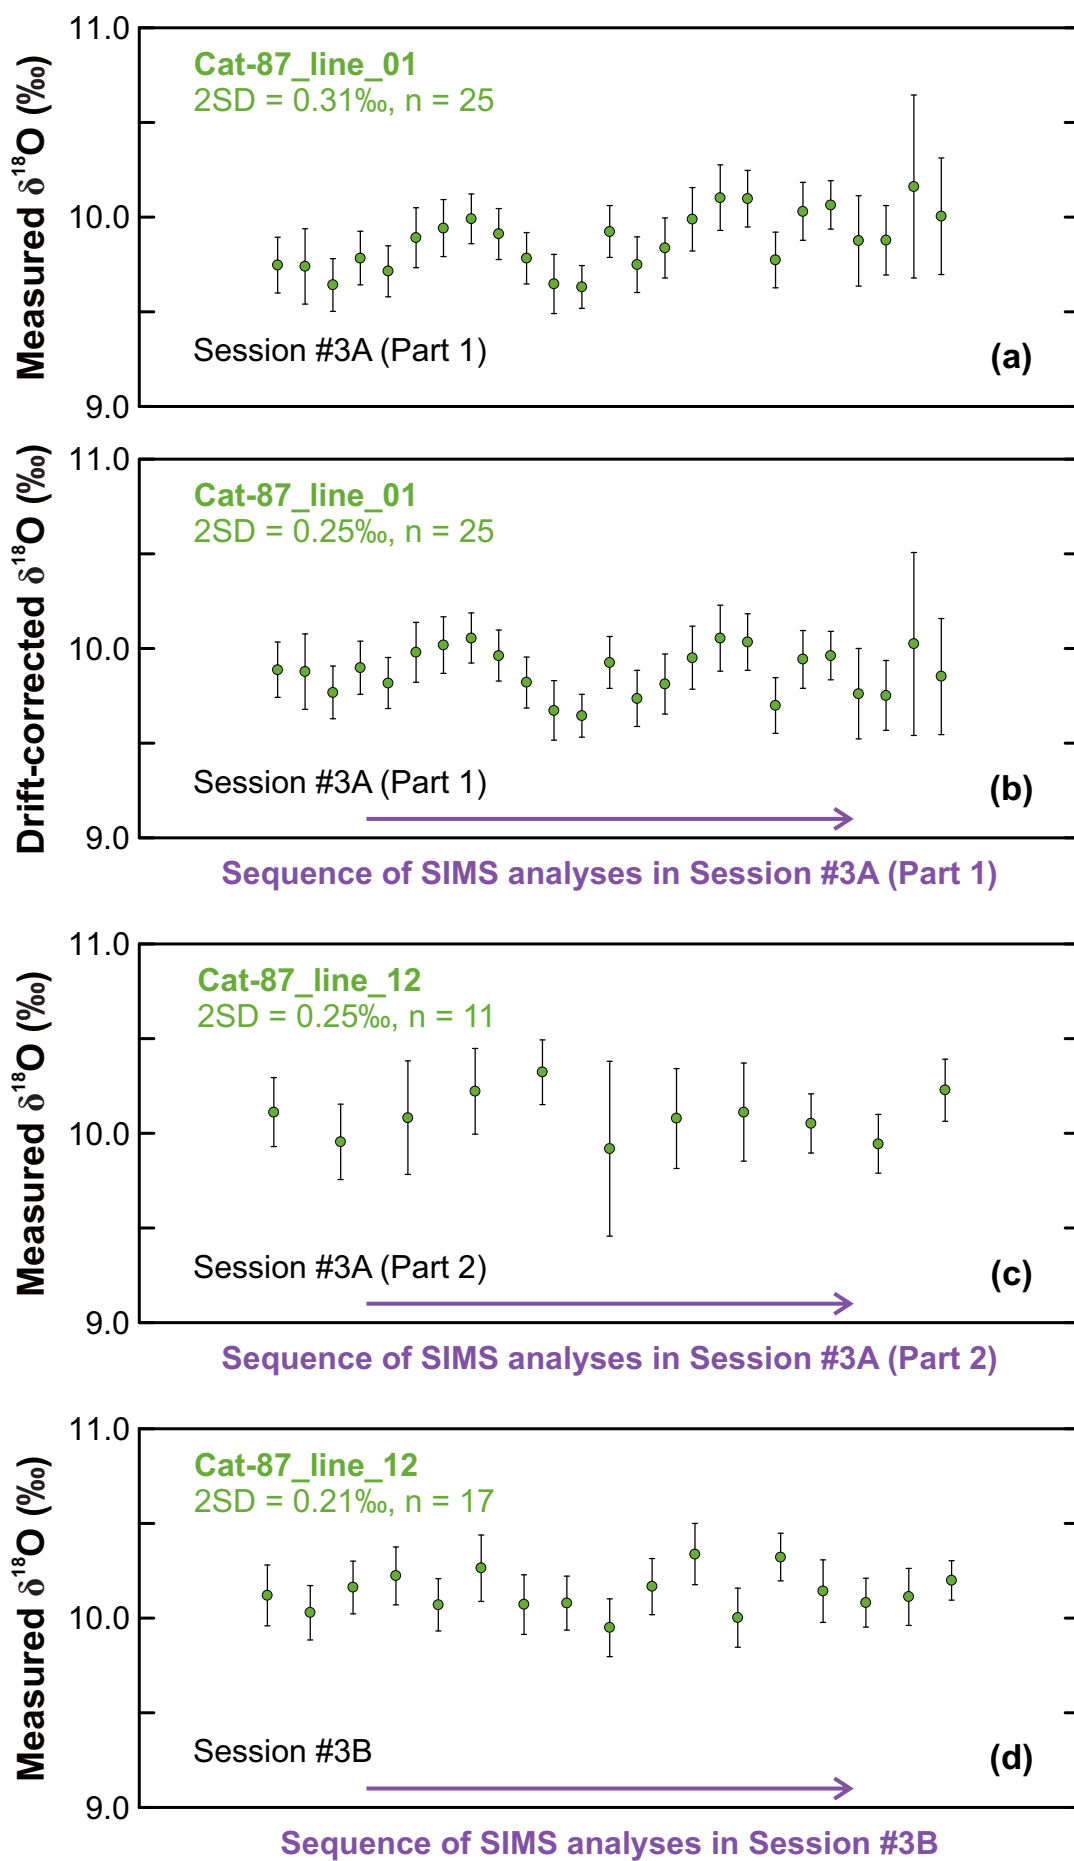

**Figure S10.** Temporal distribution plots of SIMS oxygen isotope analyses for Cat-87 clinopyroxene in Session #3A (a–c) and Session #3B (d). Error bars represent  $\pm 2\text{SE}$ .

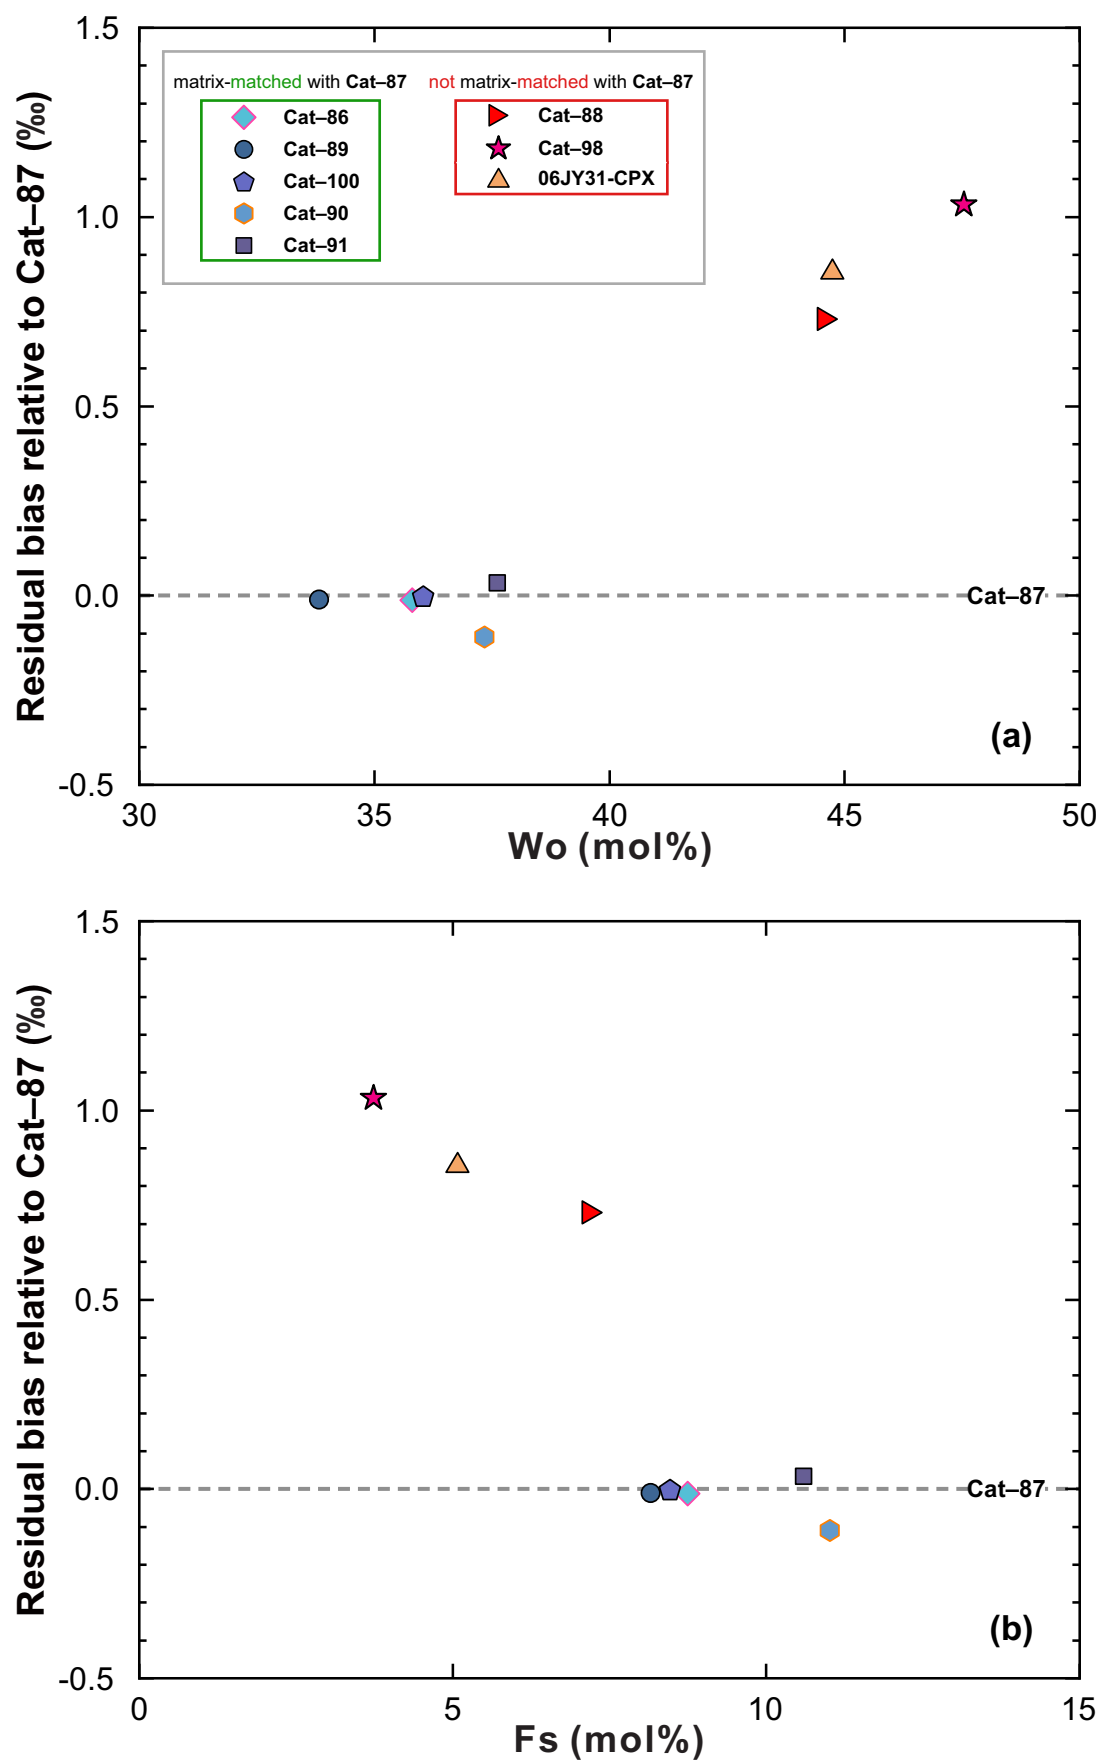

**Figure S11.** Relationship between residual bias (relative to Cat-87) and Wo (a) or Fs (b) content for the analyzed clinopyroxene samples (Section 4.4.2).
