# Supplementary material for: Cat–87 clinopyroxene: a new reference material for oxygen isotope microanalysis, with applicability tested across a range of Ca–Mg–Fe clinopyroxene compositions
Source: Royal Society of Chemistry journal article supplement (doi:10.1039/d5ja00412h), 2026-01-01
Supplement: d5ja00412h2.xlsx [file d5ja00412h2.xlsx]

## Sheet: Info
This file includes Supplementary Tables S1-S6 for:
A. Melnik, N. Korolev, Q.-L. Li, , J. Li, G.-Q. Tang, L.-J. Feng, D. Müller, V.N. Zinchenko, and X.-H. Li. Cat–87 clinopyroxene: a new reference material for oxygen isotope microanalysis, with applicability tested across a range of Ca–Mg–Fe clinopyroxene compositions. Journal of Analytical Atomic Spectrometry, submitted in October 2025
Corresponding authors: Aleksei Melnik (melnik@ustb.edu.cn) and Qiu-Li Li (liqiuli@mail.iggcas.ac.cn)

## Sheet: Table S1 Cpx RMs
Supplementary Table S1
Summary of average chemical compositions (wt.%) and recommended δ18O values for seven published Ca–Mg–Fe clinopyroxene reference materials (RMs) and one newly developed Cat–87 clinopyroxene RM
RM	Chemical group*	Pyroxene name*	SiO2	TiO2	Al2O3	FeO #	MnO	MgO	CaO	K2O	Na2O	ZnO	NiO	Cr2O3	V2O3	Mg# (mol%)	Wo (mol%)	En (mol%)	Fs (mol%)	δ18OLF (‰) ± 2SD (‰)	No. of EPMA analyses (Ref.)	No. of LF analyses (Ref.)
06JY31-CPX	Ca–Mg–Fe	Al-Cr augite	53.1253	0.2909	4.60824	2.96801	0.0755125	16.4521	20.4136	<0.01	1.10244	<0.04	0.05295	1.13163	0.049475	90.8096	44.7462	50.1758	5.07804	5.19 ± 0.12	n > 10 (This Study and ref. 11)	n = 2 (ref. 11)
																				5.52 ± 0.09		n = 2 (This Study)
06JY06-CPX	Ca–Mg–Fe	Al-Cr diopside	52.4	0.59	5.09	3.04	0.09	15.3	20.8	0.01	1.08	na	0.04	0.77	na	89.9713	46.7831	47.8799	5.33695	5.46 ± 0.10	n > 1 (ref. 11)	n = 3 (ref. 11)
NRM-AG-1	Ca–Mg–Fe	Al augite	51.2193	0.971	3.893	8.51859	0.204667	14.3897	21.7127	<0.01	0.317667	na	na	na	na	75.0692	44.8768	41.3805	13.7427	5.5 ± 0.1	n = 30 (ref. 9)	n = 2 (ref. 9)
7244-Aug	Ca–Mg–Fe	Fe-Na augite	50.8167	0.070625	1.11583	15.3622	0.636944	8.6275	19.9075	n.a.	2.13472	na	<0.08	<0.06	na	50.0272	45.3451	27.3423	27.3125	7.15 ± 0.12	n = 36 (ref. 4)	n = 3 (ref. 4)
IG-Cpx	Ca–Mg–Fe	Al-Cr diopside	51.7022	0.452535	4.52358	2.64776	0.0936718	16.7039	22.512	n.a.	0.499074	na	na	0.912712	na	91.8338	47.0768	48.6014	4.32181	5.15 ± 0.16	n = 30 (ref. 12)	n = 3 (ref. 5)
95AK-6-Di	Ca–Mg–Fe	diopside	54.9066	<0.05	0.91999	1.25772	0.0733647	17.9206	25.4121	n.a.	0.101219	na	na	<0.06	na	96.2119	49.5096	48.5778	1.91261	24.14	n = 40 (ref. 12)	(ref. 13)
JV1	Ca–Mg–Fe	diopside &	52.405	0.106111	1.58667	2.03778	0.0994444	16.1961	25.4172	<0.01	0.0155556	na	na	na	na	93.407	51.3041	45.4854	3.21052	20.3	n = 18 (ref. 9)	(ref. 7)
Cat–87	Na–Ca	Cr omphacite	55.0931	0.348782	3.83253	4.79655	0.132538	16.8553	15.2782	0.0142934	2.90684	<0.04	0.0503283	0.663046	0.0345487	86.2334	35.971	55.2143	8.81462	5.53 ± 0.14	n = 102 (This Study)	n = 8 (This Study)
92LEW-3	Ca–Mg–Fe	diopside &	52.44	0	0.04	12.46	0.31	9.93	24.04	na	0.09	na	na	na	na	58.688	50.5237	29.0367	20.4396	-0.84	n = 4 (ref. 14)	(refs. 14 and 15)
92LEW-7	Ca–Mg–Fe	hedenbergite &	51.12	0	0.02	19.25	0.42	5.58	23.26	na	0.14	na	na	na	na	34.0678	50.5113	16.8597	32.629	-0.78
92LEW-9	Ca–Mg–Fe	hedenbergite &	51.06	0	0.3	17.11	0.42	6.85	23.3	na	0.2	na	na	na	na	41.6449	50.4484	20.6357	28.9159	-0.26
Mg# = mol% Mg/(Mg + Fe); Wo = mol% Ca/(Ca + Mg + Fe); En = mol% Mg/(Ca + Mg + Fe); Fs = mol% Fe/(Ca + Mg + Fe); na = not analyzed.
* Classification follows Morimoto10 and was performed using PX-NOM (Sturm22).
# For NRM-AG-1 RM, FeOtot was calculated from FeO and Fe2O3.
& Using PX-NOM, the JV1, 92LEW-3, 92LEW-7, and 92LEW-9 reference materials are classified as wollastonite, owing to their high Wo component (>50 mol%).

## Sheet: Table S2 EPMA all
Supplementary Table S2
Representative major and minor element compositions (wt.%) for Cat–87 clinopyroxene, seven other clinopyroxene samples from the Catoca kimberlite, and clinopyroxene reference material 06JY31-CPX
Laboratory	Date	Beam size	Epoxy mount ID	Sample ID	EPMA analysis ID	SiO2	TiO2	Al2O3	Cr2O3	V2O3	FeO	MnO	NiO	MgO	CaO	ZnO	Na2O	K2O	Total	Mg# (mol%)	Wo (mol%)	En (mol%)	Fs (mol%)
Cat–87: 21 measurements within 3 fragments
LMU Munich*	November 2018	focused	CAT-I	Cat–87	7 / 1 .	54.5109	0.3577	3.7663	0.6202		4.7635	0.146		17.1706	15.2466		2.8578	bdl#	99.4482	86.5328	35.5772	55.7469	8.67598
					7 / 2 .	54.9288	0.3245	3.7555	0.7212		4.7107	0.0855		17.193	15.2044		2.8988	bdl	99.835	86.6772	35.522	55.8877	8.59029
					7 / 3 .	54.6713	0.3403	3.6603	0.59		4.7061	0.1638		17.0846	15.23		2.808	0.0269	99.2814	86.6153	35.6892	55.703	8.60781
					7 / 4 .	54.5804	0.3494	3.7664	0.7063		4.974	0.1299		17.1256	15.26		2.9041	bdl	99.8194	85.9892	35.5131	55.4518	9.03511
					7 / 5 .	54.3763	0.3339	3.7553	0.6354		4.7365	0.1264		17.1406	15.3004		2.8678	0.0253	99.2979	86.5785	35.7102	55.6612	8.62862
					7 / 6 .	54.6135	0.3181	3.6884	0.6914		4.8125	0.121		17.1604	15.0263		2.828	bdl	99.2736	86.4061	35.2244	55.97	8.80555
					7 / 7 .	54.6142	0.326	3.753	0.7044		4.7883	0.1495		17.049	15.26		2.8884	bdl	99.5405	86.3888	35.7222	55.5288	8.74901
					8 / 1 .	54.8736	0.3133	3.8744	0.6961		4.8198	0.0925		17.0693	15.1649		3.0841	bdl	100.005	86.3255	35.5347	55.65	8.81528
					8 / 2 .	54.717	0.3196	3.8071	0.6851		4.696	0.1815		16.8635	15.0893		3.0259	bdl	99.3998	86.4887	35.7416	55.5763	8.68215
					8 / 3 .	54.4838	0.3243	3.793	0.7277		4.7046	0.1085		16.9916	15.1434		3.0302	0.0265	99.3336	86.5556	35.6678	55.6831	8.64908
					8 / 4 .	54.4272	0.3589	3.8219	0.7008		4.749	bdl		17.0807	14.9153		2.9876	bdl	99.1168	86.5071	35.1881	56.0669	8.74501
					8 / 5 .	54.4217	0.3746	3.8328	0.6746		4.8681	0.105		17.006	15.1517		3.0632	bdl	99.5097	86.1632	35.5567	55.5264	8.91691
					8 / 6 .	54.6967	0.3463	3.8951	0.6611		4.794	0.1601		16.9782	15.0301		2.9653	bdl	99.5438	86.3257	35.4528	55.7208	8.82636
					8 / 7 .	54.8633	0.3856	3.8391	0.6461		4.8208	0.1904		16.9774	15.1354		2.9582	bdl	99.8193	86.2592	35.5962	55.5542	8.84958
					9 / 1 .	54.7868	0.3473	3.673	0.6563		4.7795	0.087		17.1632	15.2154		2.8794	bdl	99.5888	86.4886	35.5284	55.7606	8.71102
					9 / 2 .	54.5778	0.3613	3.6558	0.6981		4.7889	0.1065		17.2095	15.1879		2.9482	bdl	99.5474	86.4971	35.4276	55.8533	8.71914
					9 / 3 .	54.3733	0.3189	3.6991	0.6717		4.7687	0.1385		17.1203	15.2921		2.8562	bdl	99.2531	86.4858	35.7003	55.6101	8.6896
					9 / 4 .	54.5895	0.3441	3.6142	0.6482		4.7572	0.0941		17.0847	15.2309		2.9165	bdl	99.3025	86.4897	35.6571	55.6499	8.69293
					9 / 5 .	54.921	0.2875	3.6813	0.6679		4.8341	0.1402		17.2083	15.3683		2.9262	0.0308	100.066	86.3862	35.6703	55.572	8.75772
					9 / 6 .	54.7992	0.3393	3.7826	0.6733		4.7597	0.1172		17.1714	15.3072		2.8578	bdl	99.8198	86.5426	35.6697	55.6731	8.65719
					9 / 7 .	54.5716	0.3282	3.7624	0.6462		4.9278	0.1402		17.041	15.3394		2.9479	bdl	99.7101	86.0419	35.7597	55.2736	8.96671
					mean	54.638	0.338052	3.75605	0.672481		4.78856	0.126171		17.0899	15.1952		2.92855	<0.03	99.5482	86.4164	35.5766	55.6724	8.751
					2SD	0.350548	0.0451422	0.15169	0.068446		0.141753	0.0655757		0.181626	0.224608		0.153527		0.534792	0.359958	0.311255	0.354387	0.23579
					2RSD (%)	0.641583	13.3536	4.03855	10.1781		2.96023	51.9735		1.06276	1.47815		5.24244		0.53722	0.416539	0.874886	0.636559	2.69444
					min	54.3733	0.2875	3.6142	0.59		4.696	<0.08		16.8635	14.9153		2.808	<0.03	99.1168	85.9892	35.1881	55.2736	8.59029
					max	54.9288	0.3856	3.8951	0.7277		4.974	0.1904		17.2095	15.3683		3.0841	0.0308	100.066	86.6772	35.7597	56.0669	9.03511
Cat-86: 21 measurements within 3 fragments
LMU Munich	November 2018	focused	CAT-I	Cat-86	4 / 1 .	54.4911	0.3399	3.4821	0.6838		4.6603	0.1662		17.6621	15.4556		2.6323	0.0276	99.601	87.1063	35.394	56.2759	8.33013
					4 / 2 .	54.6705	0.3384	3.4568	0.5898		4.8326	0.0983		17.4719	15.4615		2.6267	0.0282	99.5746	86.5676	35.5085	55.8287	8.66276
					4 / 3 .	54.474	0.2751	3.4461	0.5866		4.8485	0.1233		17.4826	15.5381		2.6531	bdl	99.4474	86.5365	35.5995	55.7299	8.67057
					4 / 4 .	54.5368	0.3636	3.4988	0.615		4.8048	0.1715		17.5766	15.5334		2.6114	bdl	99.7296	86.7036	35.5139	55.9118	8.57435
					4 / 5 .	54.4943	0.3256	3.4365	0.6304		4.7859	0.134		17.5853	15.4688		2.6284	bdl	99.5003	86.7546	35.4207	56.0256	8.55377
					4 / 6 .	54.5865	0.3178	3.435	0.6281		4.7048	0.0875		17.541	15.283		2.6554	bdl	99.2451	86.9211	35.246	56.2849	8.46909
					4 / 7 .	54.8423	0.3208	3.4557	0.6204		4.8295	0.1232		17.7578	15.4572		2.5336	bdl	99.9635	86.7626	35.1827	56.2372	8.58014
					5 / 1 .	54.6199	0.3084	3.4362	0.5938		4.6792	0.112		17.5948	15.3726		2.623	bdl	99.3587	87.0177	35.3349	56.2701	8.39503
					5 / 2 .	54.7074	0.2754	3.3705	0.5303		4.6933	0.1422		17.5795	15.4806		2.6226	bdl	99.4112	86.9738	35.5034	56.0951	8.40146
					5 / 3 .	54.715	0.365	3.4041	0.6171		4.7165	0.096		17.606	15.6338		2.5325	bdl	99.7051	86.9349	35.6844	55.9128	8.40287
					5 / 4 .	54.861	0.3319	3.414	0.5762		4.8576	0.1315		17.6945	15.5963		2.6435	bdl	100.124	86.6546	35.4404	55.9438	8.61575
					5 / 5 .	54.6365	0.3163	3.4051	0.5369		4.6818	0.0889		17.5092	15.4131		2.5436	bdl	99.1457	86.9562	35.4905	56.095	8.41451
					5 / 6 .	54.5186	0.3161	3.4082	0.5604		4.8906	0.1137		17.5366	15.3504		2.5929	bdl	99.2983	86.4716	35.2338	56.0043	8.76186
					5 / 7 .	54.6579	0.3509	3.4562	0.5978		4.6117	0.0871		17.44	15.4784		2.5738	bdl	99.2663	87.0819	35.7113	55.9838	8.30491
					6 / 1 .	54.6347	0.3323	3.3796	0.6005		4.9437	0.1413		17.743	15.4434		2.6585	bdl	99.9008	86.4821	35.1075	56.1204	8.7721
					6 / 2 .	54.6894	0.3246	3.4155	0.6177		4.6203	0.1503		17.5965	15.4718		2.5783	bdl	99.4832	87.1612	35.5175	56.2037	8.27878
					6 / 3 .	54.5644	0.3165	3.3651	0.6153		4.9324	0.0894		17.6987	15.4634		2.6419	bdl	99.7001	86.4796	35.1933	56.0446	8.7621
					6 / 4 .	54.4112	0.3611	3.346	0.5219		4.7017	0.1521		17.5852	15.5692		2.5605	bdl	99.2251	86.9572	35.6224	55.981	8.39664
					6 / 5 .	54.5812	0.326	3.3464	0.6087		4.8745	0.1431		17.7698	15.4505		2.5931	bdl	99.704	86.6635	35.1313	56.2175	8.6512
					6 / 6 .	54.6164	0.3325	3.3439	0.6505		4.7252	bdl		17.6945	15.3195		2.5978	0.0282	99.3783	86.9709	35.1148	56.4313	8.45395
					6 / 7 .	54.7318	0.3813	3.3879	0.6546		4.8482	0.1734		17.8422	15.4952		2.5609	bdl	100.094	86.7727	35.1332	56.2867	8.58016
					mean	54.621	0.3295	3.4138	0.601705		4.77348	0.123562		17.6175	15.4636		2.60304	<0.03	99.5646	86.8062	35.3849	56.0897	8.52534
					2SD	0.230737	0.0527087	0.0895754	0.0814423		0.202891	0.061421		0.214884	0.171737		0.0812317		0.571006	0.442716	0.394359	0.35528	0.309198
					2RSD (%)	0.422432	15.9966	2.62392	13.5353		4.25039	49.7087		1.21972	1.11059		3.12065		0.573503	0.510006	1.11448	0.633414	3.62681
					min	54.4112	0.2751	3.3439	0.5219		4.6117	<0.08		17.44	15.283		2.5325	<0.03	99.1457	86.4716	35.1075	55.7299	8.27878
					max	54.861	0.3813	3.4988	0.6838		4.9437	0.1734		17.8422	15.6338		2.6585	0.0282	100.124	87.1612	35.7113	56.4313	8.7721
Cat-88: 19 measurements within 3 fragments
LMU Munich	November 2018	focused	CAT-I	Cat-88	10 / 1 .	54.3299	0.257	2.0344	0.7347		4.2636	0.1036		15.8793	20.0609		2.1797	bdl	99.8612	86.9091	44.1069	48.5762	7.31689
					10 / 2 .	54.0542	0.2285	1.9928	0.6606		4.1886	bdl		15.9475	20.0964		2.1859	bdl	99.4221	87.1578	44.1152	48.7079	7.17684
					10 / 3 .	54.6806	0.246	1.9289	0.6945		4.0466	0.1591		15.8481	20.1911		2.1215	bdl	99.9291	87.4705	44.4739	48.569	6.95712
					10 / 4 .	54.2577	0.2349	1.953	0.649		4.1066	0.0787		15.7913	20.1809		2.1377	bdl	99.409	87.2685	44.493	48.4401	7.06688
					10 / 5 .	54.3468	0.2871	1.9384	0.6849		4.1337	0.1644		15.9392	20.2141		2.0567	bdl	99.784	87.299	44.312	48.615	7.07295
					10 / 6 .	54.481	0.3301	1.9263	0.6391		4.012	0.1215		15.9826	20.3829		2.1282	bdl	100.006	87.6561	44.551	48.6044	6.84458
					10 / 7 .	54.2468	0.2728	1.894	0.699		4.0714	0.109		15.9275	20.2025		2.1058	bdl	99.5503	87.4583	44.361	48.6609	6.97805
					11 / 1 .	54.3043	0.2333	1.913	0.6966		4.297	0.0804		15.8331	20.4534		2.0798	bdl	99.9012	86.7867	44.6223	48.0605	7.31721
					11 / 3 .	54.5463	0.3094	1.9252	0.7002		4.1869	0.1466		15.8459	20.3045		2.1323	bdl	100.106	87.0906	44.5081	48.3282	7.16364
					11 / 4 .	54.2495	0.2238	1.9001	0.7236		4.2619	bdl		15.8423	20.1363		2.0996	bdl	99.5044	86.8871	44.2507	48.439	7.31034
					11 / 5 .	54.43	0.2824	1.8828	0.7788		4.324	0.1001		15.7616	20.233		2.1855	bdl	99.986	86.6625	44.4311	48.1574	7.4115
					11 / 6 .	54.491	0.2554	1.9152	0.7512		4.2096	0.1001		15.9092	20.3259		2.0781	bdl	100.046	87.0747	44.4312	48.3864	7.18246
					11 / 7 .	54.5415	0.2363	1.9013	0.6844		4.3679	0.1376		15.8291	20.4158		2.2016	bdl	100.329	86.595	44.5284	48.0356	7.43597
					12 / 1 .	54.1325	0.2985	1.9339	0.7077		4.0642	0.1002		15.8675	19.9611		2.1021	bdl	99.1867	87.4363	44.1514	48.832	7.01663
					12 / 2 .	54.2123	0.2556	1.9601	0.7095		4.2396	bdl		15.9148	20.3907		2.1147	bdl	99.8444	86.9985	44.4795	48.302	7.2185
					12 / 3 .	54.2317	0.2826	1.9313	0.7368		4.1102	0.1002		15.9362	20.118		2.142	bdl	99.6002	87.36	44.2163	48.7326	7.05107
					12 / 4 .	54.3675	0.2508	1.9276	0.7211		4.1403	0.127		15.9568	20.0946		2.092	bdl	99.6943	87.2935	44.137	48.7648	7.09822
					12 / 6 .	54.2595	0.2667	1.8845	0.7085		4.2276	0.0876		16.021	20.1337		2.0937	bdl	99.7068	87.1054	44.0328	48.7505	7.21674
					12 / 7 .	54.3031	0.2255	1.9692	0.6514		4.1052	0.0948		15.9055	20.2448		2.1143	0.0331	99.6469	87.3521	44.4168	48.5531	7.03011
					mean	54.3403	0.261932	1.93221	0.701663		4.17668	0.103589		15.8915	20.2179		2.12375	<0.03	99.7639	87.1506	44.3483	48.5008	7.15083
					2SD	0.311411	0.0604595	0.0755322	0.0719552		0.200461	0.0670137		0.133681	0.266021		0.0809115		0.562556	0.580543	0.356042	0.475826	0.319826
					2RSD (%)	0.573075	23.0822	3.90911	10.2549		4.79954	64.6916		0.841211	1.31577		3.80984		0.563887	0.666138	0.802831	0.981069	4.47258
					min	54.0542	0.2238	1.8828	0.6391		4.012	<0.08		15.7616	19.9611		2.0567	<0.03	99.1867	86.595	44.0328	48.0356	6.84458
					max	54.6806	0.3301	2.0344	0.7788		4.3679	0.1644		16.021	20.4534		2.2016	0.0331	100.329	87.6561	44.6223	48.832	7.43597
Cat-89: 21 measurements within 3 fragments
LMU Munich	November 2018	focused	CAT-I	Cat-89	13 / 1 .	55.0816	0.2771	2.7976	0.5965		4.7943	0.1503		18.9428	15.1847		2.1176	0.0342	99.9765	87.5669	33.533	58.2031	8.2639
					13 / 2 .	54.9805	0.2692	2.8175	0.6511		4.6212	0.1342		19.1846	15.3693		2.1045	bdl	100.156	88.0954	33.6538	58.448	7.89822
					13 / 3 .	54.8619	0.2851	2.7774	0.6058		4.6848	0.0895		19.023	15.3934		2.1513	0.0261	99.8981	87.8614	33.8185	58.148	8.0335
					13 / 4 .	54.9438	0.2787	2.7915	0.6741		4.6721	0.0984		19.0964	15.3965		2.1175	0.0422	100.111	87.9313	33.7546	58.2504	7.99498
					13 / 5 .	54.9947	0.3213	2.7913	0.6831		4.6518	0.1091		19.0186	15.311		2.1787	bdl	100.084	87.9342	33.7221	58.2809	7.99699
					13 / 6 .	54.8629	0.2534	2.8442	0.6489		4.5719	0.1217		19.1392	15.3891		2.1035	0.0251	99.9598	88.1828	33.7577	58.4143	7.82799
					13 / 7 .	55.206	0.3323	2.7947	0.7072		4.8001	0.1198		19.1862	15.1287		2.1313	bdl	100.425	87.6922	33.1987	58.5795	8.22176
					14 / 1 .	54.5871	0.2736	2.7826	0.6081		4.7367	0.1448		19.1003	15.2038		2.1542	bdl	99.6104	87.787	33.4324	58.4376	8.12992
					14 / 2 .	54.901	0.2721	2.7844	0.6288		4.6595	0.1055		18.8745	15.114		2.1361	bdl	99.4882	87.8356	33.5777	58.3424	8.07989
					14 / 3 .	54.958	0.2198	2.8239	0.6438		4.7034	0.1323		18.994	15.1227		2.107	0.036	99.7408	87.8028	33.4416	58.4401	8.11828
					14 / 4 .	55.0119	0.2784	2.81	0.671		4.6077	bdl		18.9754	15.2432		2.157	0.0354	99.8489	88.0109	33.6932	58.3572	7.9496
					14 / 5 .	55.0565	0.2974	2.7623	0.583		4.8097	0.1484		18.9639	15.2529		2.1113	bdl	100	87.5441	33.6023	58.1273	8.27043
					14 / 6 .	54.7544	0.3287	2.7544	0.6042		4.6355	0.175		19.0712	15.3075		2.121	0.0378	99.7897	88.0005	33.6722	58.3689	7.95898
					14 / 7 .	54.9475	0.2594	2.8086	0.6197		4.6009	0.0947		19.0232	15.2067		2.1288	0.0304	99.7198	88.0529	33.5942	58.4722	7.93353
					15 / 1 .	54.8094	0.2705	2.8048	0.653		4.6924	0.1376		18.9692	15.2827		2.0733	bdl	99.7172	87.8138	33.7083	58.2133	8.07841
					15 / 2 .	54.8762	0.3323	2.7786	0.6202		4.583	0.1234		18.9878	15.3036		2.1292	0.0363	99.7704	88.0743	33.7832	58.3201	7.89679
					15 / 3 .	54.6451	0.2928	2.7823	0.5909		4.5092	0.1145		18.9681	15.3323		2.1326	bdl	99.39	88.233	33.8886	58.3321	7.7793
					15 / 4 .	54.9271	0.3084	2.7701	0.6139		4.636	0.1823		18.9319	15.0839		2.0493	bdl	99.5241	87.9218	33.4875	58.479	8.03353
					15 / 5 .	54.9081	0.2562	2.8162	0.6134		4.7506	0.1501		18.9193	15.3106		2.1202	0.0372	99.882	87.6528	33.7669	58.0552	8.1779
					15 / 6 .	54.7292	0.2895	2.7939	0.6372		4.692	0.1216		19.1251	15.3318		2.1164	0.0279	99.8645	87.9021	33.6196	58.3498	8.03066
					15 / 7 .	55.1612	0.3052	2.8306	0.6447		4.7111	0.1591		19.1635	15.2945		2.1537	0.0295	100.453	87.8802	33.515	58.4272	8.05787
					mean	54.9145	0.285781	2.79604	0.633267		4.67257	0.127205		19.0313	15.2649		2.12355	0.0275667	99.8767	87.8941	33.6296	58.3356	8.03488
					2SD	0.308575	0.0574734	0.0454749	0.0652691		0.157218	0.0589706		0.184361	0.193062		0.0574556	0.016316	0.55005	0.37006	0.318039	0.264306	0.266824
					2RSD (%)	0.56192	20.111	1.6264	10.3067		3.36471	46.3588		0.96872	1.26474		2.70564	59.1876	0.550729	0.42103	0.945714	0.45308	3.32082
					min	54.5871	0.2198	2.7544	0.583		4.5092	<0.08		18.8745	15.0839		2.0493	<0.03	99.39	87.5441	33.1987	58.0552	7.7793
					max	55.206	0.3323	2.8442	0.7072		4.8097	0.1823		19.1862	15.3965		2.1787	0.0422	100.453	88.233	33.8886	58.5795	8.27043
Cat-90: 21 measurements within 3 fragments
LMU Munich	November 2018	focused	CAT-II	Cat-90	16 / 1 .	54.474	0.4819	3.3613	bdl		5.9835	0.1124		16.2268	16.0697		2.8343	bdl	99.5814	82.8595	37.0977	52.1205	10.7817
					16 / 2 .	54.556	0.4928	3.3757	bdl		5.9574	0.1427		16.0227	15.9692		2.811	bdl	99.3693	82.7415	37.2135	51.9505	10.836
					16 / 3 .	54.6628	0.4724	3.3176	0.0775		5.8684	0.1588		16.1841	16.0413		2.8313	bdl	99.633	83.0967	37.1847	52.1975	10.6179
					16 / 4 .	54.2962	0.4341	3.3597	0.0715		6.1303	0.148		16.3275	16.0298		2.8176	bdl	99.6279	82.6016	36.823	52.1852	10.9918
					16 / 5 .	54.4441	0.4107	3.3358	bdl		5.9102	0.148		16.1651	16.1709		2.8395	bdl	99.4628	82.9802	37.3675	51.9726	10.66
					16 / 6 .	54.3751	0.4896	3.3397	bdl		5.9655	0.1248		16.2684	16.1306		2.7963	bdl	99.5508	82.9385	37.1485	52.1281	10.7234
					16 / 7 .	54.2951	0.4564	3.3349	bdl		6.0014	0.1444		16.3172	16.0388		2.8334	0.0281	99.5025	82.896	36.9336	52.2795	10.7869
					17 / 1 .	54.4888	0.476	3.3608	bdl		5.8746	0.1464		16.0058	16.0501		2.8628	bdl	99.336	82.9255	37.4083	51.9045	10.6872
					17 / 2 .	54.4733	0.4316	3.342	bdl		5.9461	0.1375		16.0396	16.2135		2.819	bdl	99.4741	82.7837	37.5561	51.6933	10.7505
					17 / 3 .	54.4056	0.4822	3.4072	0.0958		5.9627	0.1107		16.2288	16.0287		2.8619	bdl	99.5956	82.9107	37.0496	52.1926	10.7578
					17 / 4 .	54.2612	0.4743	3.3399	bdl		5.9812	0.1428		16.1943	16.2111		2.8167	bdl	99.4498	82.8365	37.3428	51.9031	10.7542
					17 / 5 .	54.2965	0.4695	3.3191	bdl		5.9723	0.1392		16.1604	16.123		2.8439	bdl	99.3814	82.8279	37.2619	51.9646	10.7735
					17 / 6 .	54.5145	0.4741	3.3832	0.0658		6.0355	0.1357		16.1142	15.8934		2.8941	0.026	99.5365	82.6366	36.9401	52.1106	10.9493
					17 / 7 .	54.3751	0.4329	3.3273	bdl		6.1325	0.1534		16.0685	16.2508		2.877	bdl	99.6696	82.3654	37.4491	51.5203	11.0306
					18 / 1 .	54.641	0.4962	3.3448	bdl		6.0564	0.1945		16.1527	16.096		2.8568	bdl	99.9022	82.6212	37.1755	51.9064	10.9181
					18 / 2 .	54.5242	0.493	3.3507	bdl		6.11	0.1196		16.1788	16.1392		2.8668	bdl	99.8506	82.5177	37.1711	51.8449	10.984
					18 / 3 .	54.4517	0.4442	3.3355	bdl		5.8651	0.1482		16.0163	15.9164		2.8336	bdl	99.0511	82.9577	37.2064	52.0921	10.7015
					18 / 4 .	54.2387	0.4378	3.3904	0.069		5.9839	0.1624		16.1681	16.1		2.831	bdl	99.4035	82.8071	37.2115	51.9933	10.7952
					18 / 5 .	54.3042	0.4456	3.3686	bdl		6.0734	0.1731		16.2794	16.1203		2.8221	bdl	99.6418	82.6931	37.0486	52.0564	10.895
					18 / 6 .	54.4224	0.4802	3.3983	bdl		6.1507	0.1588		16.264	16.2431		2.8194	bdl	99.9845	82.4976	37.1926	51.8146	10.9928
					18 / 7 .	54.4055	0.5182	3.4395	bdl		6.1321	0.1499		16.1963	16.2837		2.7766	bdl	99.9645	82.4811	37.3438	51.6795	10.9766
					mean	54.4241	0.466367	3.35867	<0.07		6.00444	0.1453		16.1704	16.1009		2.83548	<0.03	99.5699	82.7608	37.1965	51.9767	10.8268
					2SD	0.236614	0.0543624	0.062572			0.181368	0.0387961		0.194073	0.212009		0.0550576		0.449107	0.387272	0.359547	0.387043	0.249887
					2RSD (%)	0.43476	11.6566	1.863			3.02057	26.7007		1.20017	1.31675		1.94174		0.451047	0.467941	0.966615	0.744648	2.30803
					min	54.2387	0.4107	3.3176	<0.07		5.8651	0.1107		16.0058	15.8934		2.7766	<0.03	99.0511	82.3654	36.823	51.5203	10.6179
					max	54.6628	0.5182	3.4395	0.0958		6.1507	0.1945		16.3275	16.2837		2.8941	0.0281	99.9845	83.0967	37.5561	52.2795	11.0306
Cat-91: 21 measurements within 3 fragments
LMU Munich	November 2018	focused	CAT-II	Cat-91	19 / 1 .	54.1489	0.454	3.3827	0.0858		5.6596	0.162		16.1544	15.9281		2.8426	bdl	98.8353	83.5743	37.196	52.488	10.316
					19 / 2 .	54.2848	0.5488	3.3465	0.0769		5.6712	0.0997		16.1629	16.1483		2.8474	bdl	99.2054	83.5534	37.4991	52.2216	10.2793
					19 / 3 .	54.3851	0.5171	3.3754	0.0773		5.8251	0.1228		16.2039	16.0654		2.8386	bdl	99.4318	83.2175	37.2251	52.2397	10.5352
					19 / 4 .	54.3628	0.4638	3.3755	0.1162		5.5579	0.1585		16.1951	16.2102		2.7999	bdl	99.2524	83.8558	37.6269	52.3034	10.0697
					19 / 5 .	54.3012	0.5139	3.464	0.0991		5.9226	0.0961		16.2953	16.1241		2.8431	bdl	99.6763	83.0637	37.1357	52.2174	10.6469
					19 / 6 .	54.4103	0.5013	3.4142	0.1153		5.8643	0.1406		16.2585	16.2033		2.8503	bdl	99.7734	83.1708	37.3332	52.1205	10.5463
					19 / 7 .	54.4158	0.4666	3.4042	0.0851		5.8442	0.1246		16.2928	16.1143		2.8148	bdl	99.5781	83.2482	37.1769	52.2991	10.524
					20 / 1 .	54.521	0.5034	3.3848	0.1249		5.7899	0.1788		16.3358	16.3185		2.8818	bdl	100.057	83.4145	37.4565	52.1703	10.3732
					20 / 2 .	54.3294	0.4608	3.392	0.0829		5.6906	0.1627		16.0788	16.3216		2.8619	bdl	99.4039	83.4344	37.8388	51.8638	10.2974
					20 / 3 .	54.352	0.4607	3.3905	0.1238		5.5702	0.2217		16.2928	16.2553		2.8119	bdl	99.4878	83.9072	37.5654	52.3872	10.0475
					20 / 4 .	54.4564	0.5206	3.4173	0.1279		5.785	0.1894		16.2601	16.1771		2.8981	bdl	99.8455	83.3618	37.3467	52.229	10.4244
					20 / 5 .	54.6002	0.448	3.3276	bdl		5.8213	0.109		16.1431	16.3635		2.8246	bdl	99.7107	83.1741	37.7318	51.791	10.4772
					20 / 6 .	54.4948	0.4685	3.3563	0.0835		5.8331	0.1323		16.1828	16.3891		2.8618	bdl	99.8204	83.1801	37.7125	51.8108	10.4767
					20 / 7 .	54.5035	0.5145	3.4142	0.0956		5.7237	0.1359		16.2417	16.3115		2.8022	bdl	99.7671	83.4935	37.6041	52.0965	10.2994
					21 / 1 .	54.4649	0.5674	3.3885	0.1422		5.6348	0.1446		16.1979	16.3489		2.7976	0.0324	99.7192	83.6712	37.7712	52.0676	10.1612
					21 / 2 .	54.4369	0.5011	3.368	0.0911		5.7066	0.1731		16.2191	16.446		2.8948	bdl	99.8521	83.5155	37.8359	51.9167	10.2474
					21 / 3 .	54.4656	0.4523	3.421	0.088		5.5565	0.116		16.0419	16.3066		2.8255	bdl	99.2813	83.7301	37.9545	51.9508	10.0947
					21 / 4 .	54.445	0.528	3.4269	0.0936		5.6865	0.1642		16.3194	16.4366		2.8759	bdl	99.9814	83.6485	37.7149	52.1005	10.1845
					21 / 5 .	54.2908	0.5011	3.361	0.1062		5.7872	0.0964		16.222	16.5132		2.7989	bdl	99.6985	83.324	37.8736	51.7662	10.3602
					21 / 6 .	54.4	0.5011	3.4659	0.0938		5.7922	0.1053		16.1999	16.4625		2.8035	bdl	99.8445	83.293	37.8246	51.7878	10.3876
					21 / 7 .	54.2506	0.4663	3.4623	0.101		5.8009	0.0964		16.3695	16.6189		2.7863	bdl	99.9647	83.4167	37.8369	51.8544	10.3087
					mean	54.3962	0.4933	3.39709	0.0987333		5.73921	0.139529		16.2223	16.2887		2.83626	<0.03	99.628	83.4404	37.5838	52.0801	10.3361
					2SD	0.209178	0.06728	0.0756406	0.0399054		0.209736	0.0698051		0.163498	0.329396		0.0676271		0.607608	0.46748	0.520228	0.432849	0.331361
					2RSD (%)	0.384545	13.6388	2.22663	40.4174		3.65445	50.0292		1.00786	2.02223		2.38437		0.609877	0.560256	1.38418	0.831121	3.20587
					min	54.1489	0.448	3.3276	<0.07		5.5565	0.0961		16.0419	15.9281		2.7863	<0.03	98.8353	83.0637	37.1357	51.7662	10.0475
					max	54.6002	0.5674	3.4659	0.1422		5.9226	0.2217		16.3695	16.6189		2.8981	0.0324	100.057	83.9072	37.9545	52.488	10.6469
Cat-98: 21 measurements within 3 fragments
LMU Munich	November 2018	focused	CAT-II	Cat-98	22 / 1 .	54.3133	0.2043	1.5205	2.3884		1.944	0.0928		15.758	21.3805		2.2175	bdl	99.8287	93.5272	47.7001	48.9147	3.38526
					22 / 2 .	54.5518	0.2011	1.5113	2.4245		1.9944	bdl		15.7754	21.2257		2.1748	bdl	99.9176	93.3774	47.4513	49.0686	3.48011
					22 / 3 .	54.619	0.1899	1.4529	2.4471		2.1235	bdl		15.9911	21.1687		2.1744	bdl	100.257	93.0669	46.9629	49.36	3.67711
					22 / 4 .	54.6387	0.1472	1.5796	2.3927		1.9628	0.0821		15.815	21.3425		2.2479	bdl	100.209	93.4907	47.5559	49.0304	3.41373
					22 / 5 .	54.5419	0.152	1.5738	2.2652		2.004	bdl		15.9213	21.3718		2.2356	bdl	100.147	93.4045	47.4001	49.1307	3.4692
					22 / 6 .	54.2578	0.1615	1.4779	2.3406		1.961	bdl		15.8882	21.3658		2.2223	bdl	99.7391	93.5243	47.4769	49.1219	3.40122
					22 / 7 .	54.5795	0.114	1.2962	2.324		2.0607	bdl		15.9898	21.3227		2.1774	bdl	99.9372	93.2576	47.1965	49.2433	3.56022
					23 / 1 .	54.4429	0.1984	1.2298	2.7835		2.171	bdl		15.6885	20.9196		2.3111	bdl	99.7888	92.7961	47.0713	49.1158	3.81291
					23 / 2 .	54.3823	0.1794	1.2095	2.8347		2.1884	bdl		15.6558	20.9177		2.3242	bdl	99.7206	92.7285	47.1029	49.0507	3.8464
					23 / 3 .	54.3691	0.1891	1.1786	2.4675		2.1253	bdl		15.8178	21.4352		2.1287	bdl	99.7827	92.9907	47.5259	48.7961	3.67804
					23 / 4 .	54.7242	0.1589	1.0594	2.5452		2.0259	bdl		16.0592	21.347		2.1391	bdl	100.115	93.3907	47.1525	49.3547	3.49285
					23 / 5 .	54.529	0.1398	1.0871	2.7095		2.0288	0.0788		15.9374	21.3615		2.1726	bdl	100.06	93.3347	47.3442	49.1461	3.50969
					23 / 6 .	54.681	0.1859	1.1728	2.5235		2.0369	bdl		16.068	21.5093		2.1937	bdl	100.402	93.3606	47.3196	49.1828	3.49767
					23 / 7 .	54.4747	0.1399	1.3615	2.4357		1.8517	bdl		15.7578	21.7835		2.0966	bdl	99.9757	93.8155	48.2433	48.5558	3.20091
					24 / 1 .	54.6156	0.1754	1.3587	2.8935		2.1112	bdl		15.6106	20.639		2.381	bdl	99.8593	92.9481	46.8997	49.3557	3.7446
					24 / 2 .	54.5996	0.218	1.3427	2.8151		2.2824	bdl		15.5981	20.7975		2.391	bdl	100.109	92.414	46.9666	49.0102	4.02313
					24 / 3 .	54.6201	0.1374	1.3055	3.0338		2.1598	bdl		15.6849	20.797		2.3366	bdl	100.11	92.8291	46.9395	49.2556	3.80492
					24 / 4 .	54.6348	0.1564	1.2705	2.9889		2.1172	0.0784		15.8182	20.8987		2.3885	bdl	100.352	93.0158	46.9002	49.3912	3.70861
					24 / 5 .	54.6525	0.1692	1.2378	2.6492		2.1351	bdl		16.0005	21.3435		2.2315	bdl	100.462	93.0355	47.1447	49.1742	3.68112
					24 / 6 .	54.4593	0.1595	1.2679	2.9308		2.1909	bdl		15.6608	20.861		2.4176	bdl	100.027	92.723	47.0258	49.1192	3.85494
					24 / 7 .	54.6142	0.2276	1.5213	2.865		2.1134	bdl		15.6174	20.6373		2.5494	bdl	100.207	92.9441	46.8857	49.3666	3.74769
					mean	54.5382	0.171662	1.33406	2.62183		2.07564	<0.08		15.8149	21.1631		2.26245	<0.03	100.048	93.1417	47.2507	49.1307	3.61859
					2SD	0.252859	0.0583046	0.312462	0.488986		0.204506			0.306362	0.628896		0.23072		0.439158	0.690051	0.671018	0.408506	0.400179
					2RSD (%)	0.463638	33.9648	23.4219	18.6506		9.85267			1.93717	2.97166		10.1978		0.438948	0.740862	1.42012	0.831469	11.059
					min	54.2578	0.114	1.0594	2.2652		1.8517	<0.08		15.5981	20.6373		2.0966	<0.03	99.7206	92.414	46.8857	48.5558	3.20091
					max	54.7242	0.2276	1.5796	3.0338		2.2824	0.0928		16.068	21.7835		2.5494	<0.03	100.462	93.8155	48.2433	49.3912	4.02313
Cat-100: 21 measurements within 3 fragments
LMU Munich	November 2018	focused	CAT-II	Cat-100	25 / 1 .	54.7505	0.3636	3.9982	0.5809		4.5995	0.1072		17.299	15.5263		2.8965	0.035	100.157	87.0202	35.9527	55.7341	8.3132
					25 / 2 .	54.4412	0.3382	4.0506	0.5649		4.7502	0.1018		17.2832	15.617		2.8047	0.0337	99.9855	86.6411	36.0073	55.444	8.54869
					25 / 3 .	54.5357	0.2796	4.0187	0.5597		4.8324	0.1339		17.2984	15.5312		2.7773	bdl	99.9897	86.4516	35.8099	55.4934	8.69672
					25 / 4 .	54.3814	0.3239	4.0314	0.5405		4.6978	0.1446		17.28	15.4033		2.8453	0.0313	99.6794	86.7669	35.728	55.7668	8.50519
					25 / 5 .	54.4788	0.2656	4.0477	0.5439		4.6676	0.1268		17.2355	15.5556		2.8017	0.0322	99.7552	86.8113	36.0255	55.5371	8.43744
					25 / 6 .	54.5589	0.2909	4.0084	0.5642		4.5918	0.0768		17.3574	15.4051		2.7256	0.0251	99.6041	87.0771	35.71	55.9818	8.30813
					25 / 7 .	54.7646	0.324	3.9687	0.5793		4.7046	0.1286		17.2839	15.5819		2.7901	0.0272	100.153	86.7529	35.9843	55.5355	8.48026
					26 / 1 .	54.7123	0.359	4.0242	0.5582		4.4254	0.1072		17.4702	15.4594		2.7493	0.0328	99.898	87.5576	35.7685	56.2396	7.99198
					26 / 2 .	54.6355	0.3099	4.0993	0.5687		4.4806	0.1215		17.4616	15.4659		2.7038	0.0257	99.8725	87.4165	35.7524	56.163	8.08463
					26 / 3 .	54.8727	0.2941	4.0782	0.5788		4.5777	0.1197		17.4775	15.5441		2.7612	bdl	100.328	87.1889	35.7874	55.9862	8.22634
					26 / 4 .	54.6522	0.3193	4.0565	0.549		4.5931	0.1322		17.3671	15.4623		2.7417	bdl	99.895	87.0802	35.7832	55.9202	8.29669
					26 / 5 .	54.7408	0.321	4.0527	0.5978		4.5459	0.1376		17.3934	15.4972		2.8132	0.0257	100.125	87.2129	35.8352	55.96	8.20485
					26 / 6 .	54.599	0.2941	4.0225	0.5768		4.4741	0.1536		17.4676	15.4474		2.7461	0.0263	99.8074	87.4362	35.7222	56.2021	8.07574
					26 / 7 .	54.7432	0.299	4.0605	0.6086		4.3907	0.1179		17.2961	15.6758		2.7596	0.0356	99.987	87.5342	36.3136	55.7474	7.93903
					27 / 1 .	54.7577	0.326	4.1242	0.5609		4.6808	0.1091		17.5189	15.6746		2.7984	0.0291	100.58	86.9649	35.8661	55.774	8.35992
					27 / 2 .	54.6803	0.3055	4.0609	0.5594		4.478	0.1609		17.3258	15.5664		2.7636	bdl	99.9255	87.3367	36.0601	55.843	8.09687
					27 / 3 .	54.7311	0.3007	3.984	0.5654		4.5289	0.1037		17.3525	15.4499		2.8128	0.0288	99.8579	87.2284	35.8231	55.9805	8.19643
					27 / 4 .	54.4979	0.3148	4.0403	0.5519		4.6859	0.143		17.5112	15.4777		2.7914	bdl	100.03	86.9475	35.5814	56.0104	8.40821
					27 / 5 .	54.452	0.3799	3.9866	0.5514		4.4782	0.0894		17.47	15.4382		2.8091	0.0276	99.6823	87.4276	35.7031	56.2133	8.08364
					27 / 6 .	54.7073	0.2881	4.0282	0.5547		4.5483	0.1198		17.3829	15.4364		2.7159	0.0347	99.8163	87.2002	35.7554	56.0214	8.22316
					27 / 7 .	54.6517	0.2721	3.9802	0.4884		4.5804	0.1322		17.4786	15.5039		2.7959	0.0294	99.913	87.183	35.725	56.0369	8.23813
					mean	54.6355	0.312824	4.03438	0.562067		4.58628	0.122262		17.3815	15.5105		2.7811	0.0280286	99.9543	87.1065	35.8426	55.8853	8.27215
					2SD	0.261976	0.0592844	0.079348	0.0476482		0.226879	0.0414781		0.179199	0.159281		0.0896872	0.0101452	0.453148	0.603689	0.328187	0.482739	0.389063
					2RSD (%)	0.479498	18.9514	1.9668	8.47733		4.9469	33.9256		1.03098	1.02693		3.22488	36.1958	0.453355	0.693047	0.915633	0.863804	4.70329
					min	54.3814	0.2656	3.9687	0.4884		4.3907	0.0768		17.2355	15.4033		2.7038	<0.03	99.6041	86.4516	35.5814	55.444	7.93903
					max	54.8727	0.3799	4.1242	0.6086		4.8324	0.1609		17.5189	15.6758		2.8965	0.0356	100.58	87.5576	36.3136	56.2396	8.69672
Cat–87: 28 measurements within 28 fragments
IMR CAGS**	November 2024	2 µm	A7021	Cat–87	cat871_66	54.915	0.342	3.759	0.654	0.018	4.684	bdl		16.865	15.271	0.478	2.929	0.035	99.95	86.5196	36.0232	55.3525	8.62433
					cat871_67	55.261	0.344	3.863	0.749	0.016	4.616	0.008		16.793	15.16	0.065	3.015	0.015	99.905	86.6398	35.9856	55.4619	8.55244
					cat871_68	55.043	0.335	3.844	0.625	bdl	4.718	0.031		16.776	15.415	0.195	3.001	0.012	100.002	86.3729	36.3228	54.9998	8.67737
					cat871_69	54.971	0.302	3.907	0.624	0.063	4.764	bdl		16.762	15.319	0.163	2.979	0.012	99.87	86.2484	36.1644	55.0571	8.77844
					cat871_70	54.768	0.35	3.857	0.717	0.025	4.797	0.031		16.935	15.308	0.239	2.994	0.01	100.031	86.2882	35.9218	55.2919	8.78626
					cat871_71	55.089	0.35	3.855	0.696	bdl	4.998	0.062		16.931	15.207	0.043	2.986	0.006	100.228	85.7924	35.6427	55.2137	9.14361
					cat871_72	54.876	0.329	3.828	0.716	0.07	4.67	bdl		16.799	15.583	bdl	2.931	0.012	99.814	86.5088	36.5786	54.8651	8.55632
					cat871_73	55.201	0.406	3.956	0.623	0.043	4.893	bdl		16.848	15.398	0.206	3.097	0.017	100.692	85.9902	36.0958	54.9513	8.95287
					cat871_74	55.265	0.348	3.851	0.7	0.057	4.664	bdl		16.738	15.201	bdl	3.077	0.016	99.917	86.4813	36.0813	55.2777	8.64098
					cat871_75	54.962	0.356	3.737	0.668	0.063	4.803	bdl		16.9	15.429	bdl	2.966	0.01	99.894	86.2489	36.1405	55.0781	8.78138
					cat871_76	54.991	0.3	3.861	0.645	0.021	4.901	bdl		16.828	15.269	bdl	2.986	0.017	99.819	85.9561	35.9202	55.0805	8.99928
					cat871_77	55.088	0.394	3.778	0.678	bdl	4.75	0.039		16.883	15.2	bdl	2.995	0.012	99.817	86.3681	35.851	55.4043	8.74471
					cat871_78	54.743	0.342	3.878	0.629	0.046	4.814	0.027		16.747	15.496	bdl	2.894	0.014	99.63	86.1134	36.4145	54.7556	8.82989
					cat871_79	54.88	0.325	3.88	0.673	0.046	4.988	0.012		16.883	15.281	0.39	2.959	0.024	100.341	85.7822	35.8167	55.0579	9.12545
					cat872_65	55.084	0.323	3.822	0.619	0.041	4.777	0.008		16.908	15.33	0.13	2.908	0.006	99.956	86.3187	35.9998	55.2442	8.75603
					cat872_64	55.139	0.381	3.843	0.641	0.091	4.835	0.016		16.757	15.331	0.152	2.966	0.011	100.163	86.0684	36.1412	54.9623	8.89657
					cat872_63	55.045	0.318	3.837	0.588	0.02	4.944	0.012		16.911	15.268	0.184	3.092	0.017	100.236	85.91	35.7932	55.16	9.04673
					cat872_62	55.112	0.417	3.96	0.627	0.03	4.857	0.07		16.886	15.38	0.119	2.9	0.01	100.368	86.1059	36.0479	55.0665	8.88559
					cat872_60	55.027	0.327	3.811	0.64	0.027	4.903	0.035		16.906	15.237	0.033	3.086	0.014	100.046	86.007	35.7792	55.2343	8.98644
					cat872_59	55.158	0.343	3.772	0.65	0.027	4.887	bdl		16.697	15.177	bdl	2.96	0.021	99.692	85.8962	35.945	55.0208	9.03418
					cat872_58	55.08	0.392	3.88	0.674	0.03	4.848	bdl		16.705	15.275	bdl	3.096	0.007	99.987	85.9988	36.1098	54.9448	8.94541
					cat872_57	55.012	0.433	3.813	0.643	0.027	4.826	0.047		16.999	15.345	bdl	3.067	0.016	100.228	86.2615	35.8834	55.3079	8.80864
					cat872_56	55.302	0.34	3.812	0.671	0.039	4.855	bdl		16.896	15.359	0.076	2.955	0.017	100.322	86.1179	36.006	55.1103	8.88373
					cat872_55	55.137	0.369	3.684	0.638	0.02	5.051	bdl		17.185	15.456	0.033	2.811	0.019	100.403	85.8453	35.6878	55.2089	9.10322
					cat872_54	55.482	0.36	3.731	0.659	0.048	4.809	0.027		16.924	15.273	0.174	2.82	0.028	100.335	86.2509	35.8742	55.3091	8.81671
					cat872_53	55.115	0.398	3.727	0.681	0.018	4.82	0.019		17.216	15.386	0.239	2.882	0.012	100.513	86.4258	35.697	55.5744	8.72865
					cat872_52	54.588	0.306	3.808	0.601	0.023	4.675	0.05		16.583	15.261	bdl	2.957	0.013	98.865	86.3444	36.3506	54.9577	8.6917
					cat872_51	54.897	0.394	3.808	0.695	0.036	5.058	bdl		16.664	15.195	bdl	2.901	0.017	99.665	85.4498	35.8979	54.7752	9.32698
					mean	55.044	0.354429	3.82721	0.658	0.0341786	4.82875	0.0179286		16.8545	15.3146	0.10425	2.97179	0.015	100.025	86.154	36.0061	55.133	8.86085
					2SD	0.36726	0.0709646	0.129697	0.074845	0.0419914	0.230712	0.0415333		0.274145	0.204443	0.252359	0.156133	0.0127192	0.701969	0.544469	0.447194	0.402079	0.37795
					2RSD (%)	0.667212	20.0223	3.38882	11.3746	122.859	4.77788	231.66		1.62654	1.33495	242.071	5.25385	84.7946	0.701796	0.631972	1.24199	0.72929	4.2654
					min	54.588	0.3	3.684	0.588	<0.02	4.616	<0.01		16.583	15.16	<0.02	2.811	0.006	98.865	85.4498	35.6427	54.7556	8.55244
					max	55.482	0.433	3.96	0.749	0.091	5.058	0.07		17.216	15.583	0.478	3.097	0.035	100.692	86.6398	36.5786	55.5744	9.32698
Cat-86: 5 measurements within 5 fragments
IMR CAGS	November 2024	2 µm	A7021	Cat-86	cat86_1	55.139	0.298	3.543	0.463	0.064	5.075	0.012		17.035	15.557	bdl	2.625	0.035	99.846	85.6803	35.995	54.8397	9.1653
					cat86_2	55.003	0.307	3.546	0.503	0.064	4.734	0.035		17.183	15.481	0.347	2.535	0.018	99.756	86.6134	35.9324	55.4911	8.5765
					cat86_3	55.154	0.354	3.56	0.542	0.068	5.195	bdl		17.274	15.493	0.271	2.606	0.024	100.545	85.5642	35.549	55.1469	9.30404
					cat86_4	55.173	0.363	3.386	0.604	0.018	5.134	bdl		17.596	15.575	0.271	2.621	0.011	100.752	85.9342	35.3459	55.5599	9.09413
					cat86_5	54.969	0.309	3.281	0.593	0.068	4.716	0.043		16.977	15.547	bdl	2.539	0.005	99.047	86.5174	36.2832	55.1261	8.59068
					mean	55.0876	0.3262	3.4632	0.541	0.0564	4.9708	0.0188		17.213	15.5306	0.1778	2.5852	0.0186	99.9892	86.0619	35.8211	55.2327	8.94613
					2SD	0.188593	0.0598899	0.248497	0.119172	0.0431184	0.456897	0.0382988		0.488559	0.08253	0.330495	0.0891785	0.0232637	1.3614	0.959806	0.745682	0.589082	0.67898
					2RSD (%)	0.342351	18.3599	7.17536	22.0281	76.4511	9.19162	203.717		2.83831	0.531402	185.88	3.44958	125.074	1.36155	1.11525	2.08168	1.06654	7.58965
					min	54.969	0.298	3.281	0.463	0.018	4.716	<0.01		16.977	15.481	<0.02	2.535	0.005	99.047	85.5642	35.3459	54.8397	8.5765
					max	55.173	0.363	3.56	0.604	0.068	5.195	0.043		17.596	15.575	0.347	2.625	0.035	100.752	86.6134	36.2832	55.5599	9.30404
Cat-88: 5 measurements within 5 fragments
IMR CAGS	November 2024	2 µm	A7021	Cat-88	cat88_6	54.755	0.233	1.901	0.596	0.054	4.313	bdl		16.035	20.329	bdl	1.952	0.03	100.198	86.8891	44.1879	48.4946	7.31748
					cat88_7	54.997	0.256	1.826	0.58	0.095	4.318	bdl		15.828	20.35	0.206	2.007	0.006	100.469	86.727	44.488	48.1439	7.3681
					cat88_8	54.808	0.243	1.757	0.67	0.054	4.272	bdl		15.897	20.253	bdl	1.953	0.016	99.923	86.8994	44.3117	48.3928	7.29549
					cat88_9	54.756	0.256	1.895	0.597	0.065	4.522	0.054		15.856	20.233	bdl	1.936	bdl	100.17	86.2076	44.1539	48.1436	7.70253
					cat88_10	55.06	0.218	1.861	0.568	0.065	3.955	bdl		15.801	20.253	0.304	2.009	0.021	100.115	87.6872	44.6842	48.5049	6.81091
					mean	54.8752	0.2412	1.848	0.6022	0.0666	4.276	<0.01		15.8834	20.2836	0.102	1.9714	0.0146	100.175	86.8821	44.3651	48.336	7.2989
					2SD	0.286634	0.0323543	0.118119	0.0795286	0.0336036	0.408296			0.183786	0.104418	0.287805	0.068185	0.023816	0.392548	1.06188	0.442472	0.361697	0.637333
					2RSD (%)	0.522337	13.4139	6.3917	13.2063	50.4558	9.54856			1.15709	0.514792	282.162	3.45871	163.123	0.391862	1.22221	0.997342	0.748298	8.7319
					min	54.755	0.218	1.757	0.568	0.054	3.955	<0.01		15.801	20.233	<0.02	1.936	<0.01	99.923	86.2076	44.1539	48.1436	6.81091
					max	55.06	0.256	1.901	0.67	0.095	4.522	0.054		16.035	20.35	0.304	2.009	0.03	100.469	87.6872	44.6842	48.5049	7.70253
Cat-89: 5 measurements within 5 fragments
IMR CAGS	November 2024	2 µm	A7021	Cat-89	cat89_11	55.347	0.317	2.788	0.659	0.073	4.83	bdl		18.894	15.271	0.087	2.062	0.037	100.365	87.4577	33.6891	57.9939	8.31694
					cat89_12	54.984	0.294	2.776	0.637	0.073	4.935	0.031		18.872	15.186	0.12	2.057	0.03	99.995	87.2069	33.5265	57.9695	8.50406
					cat89_13	55.328	0.376	2.783	0.643	0.02	4.576	0.035		18.979	15.094	bdl	2.088	0.023	99.945	88.0855	33.4885	58.587	7.9245
					cat89_14	55.169	0.273	2.831	0.623	0.047	4.939	bdl		18.737	15.222	0.196	2.079	0.027	100.143	87.1175	33.7167	57.7444	8.53898
					cat89_15	55.107	0.298	2.853	0.602	0.09	4.766	0.023		18.938	15.331	bdl	2.043	0.038	100.089	87.6285	33.7684	58.0378	8.19385
					mean	55.187	0.3116	2.8062	0.6328	0.0606	4.8092	0.0178		18.884	15.2208	0.0806	2.0658	0.031	100.107	87.4992	33.6378	58.0665	8.29567
					2SD	0.305637	0.0784933	0.0677259	0.0430442	0.0548197	0.298923	0.0336274		0.183831	0.178759	0.167043	0.0357603	0.0128841	0.327065	0.770337	0.246145	0.624668	0.501214
					2RSD (%)	0.553821	25.1904	2.41344	6.80217	90.4616	6.21564	188.918		0.973477	1.17444	207.249	1.73106	41.5616	0.326714	0.880393	0.731749	1.07578	6.04188
					min	54.984	0.273	2.776	0.602	0.02	4.576	<0.01		18.737	15.094	<0.02	2.043	0.023	99.945	87.1175	33.4885	57.7444	7.9245
					max	55.347	0.376	2.853	0.659	0.09	4.939	0.035		18.979	15.331	0.196	2.088	0.038	100.365	88.0855	33.7684	58.587	8.53898
Cat-90: 5 measurements within 5 fragments
IMR CAGS	November 2024	2 µm	A7021	Cat-90	cat90_16	55.052	0.39	3.446	0.043	0.093	6.486	bdl		16.166	15.988	0.369	2.798	0.013	100.848	81.6275	36.7176	51.6558	11.6266
					cat90_17	54.789	0.461	3.458	0.056	0.063	6.094	0.031		16.035	15.962	0.119	2.735	0.008	99.811	82.4265	37.096	51.8496	11.0544
					cat90_18	55.022	0.467	3.493	0.045	0.046	6.185	0.027		16.032	16.099	bdl	2.817	0.013	100.246	82.208	37.238	51.5954	11.1666
					cat90_19	54.933	0.401	3.402	0.075	0.055	6.433	0.039		15.75	16.008	bdl	2.878	0.005	99.979	81.3581	37.2773	51.0299	11.6927
					cat90_20	54.842	0.378	3.478	0.029	0.063	5.871	bdl		15.96	16.174	0.261	2.899	0.031	99.99	82.8936	37.6468	51.6868	10.6664
					mean	54.9276	0.4194	3.4554	0.0496	0.064	6.2138	0.021		15.9886	16.0462	0.1498	2.8254	0.014	100.175	82.1027	37.1951	51.5635	11.2413
					2SD	0.225728	0.0831457	0.069794	0.0342812	0.035327	0.504812	0.032218		0.305377	0.176229	0.325949	0.131062	0.020199	0.814314	1.23362	0.671154	0.625532	0.850442
					2RSD (%)	0.410956	19.8249	2.01985	69.1153	55.1985	8.12404	153.419		1.90997	1.09826	217.59	4.6387	144.279	0.812893	1.50254	1.80441	1.21313	7.56531
					min	54.789	0.378	3.402	0.029	0.046	5.871	<0.01		15.75	15.962	<0.02	2.735	0.005	99.811	81.3581	36.7176	51.0299	10.6664
					max	55.052	0.467	3.493	0.075	0.093	6.486	0.039		16.166	16.174	0.369	2.899	0.031	100.848	82.8936	37.6468	51.8496	11.6927
Cat-91: 5 measurements within 5 fragments
IMR CAGS	November 2024	2 µm	A7021	Cat-91	cat91_31	54.896	0.524	3.459	0.087	0.052	5.773	bdl		16.049	16.242	bdl	2.739	bdl	99.829	83.2088	37.7038	51.8359	10.4602
					cat91_32	54.72	0.47	3.504	0.099	0.077	6.108	0.043		16.145	16.044	bdl	2.771	0.009	99.99	82.4922	37.0746	51.9085	11.0168
					cat91_33	55.164	0.599	3.499	0.092	0.03	6.06	bdl		16.193	16.237	0.174	2.925	0.014	100.987	82.6485	37.3288	51.7968	10.8744
					cat91_34	54.771	0.476	3.491	0.114	0.039	6.034	bdl		16.134	16.01	bdl	2.92	0.012	100.001	82.6578	37.0878	52.0018	10.9104
					cat91_35	54.877	0.537	3.601	0.091	0.066	5.954	0.012		16.157	16.157	bdl	2.859	0.016	100.327	82.8685	37.3276	51.9357	10.7367
					mean	54.8856	0.5212	3.5108	0.0966	0.0528	5.9858	<0.01		16.1356	16.138	0.0348	2.8428	0.011	100.227	82.7752	37.3045	51.8957	10.7997
					2SD	0.343868	0.104761	0.106756	0.0212885	0.038351	0.262787			0.106504	0.214937	0.15563	0.170026	0.00938083	0.923715	0.553791	0.510292	0.162456	0.429157
					2RSD (%)	0.626518	20.0999	3.04078	22.0378	72.6345	4.39017			0.660059	1.33187	447.214	5.98093	85.2803	0.921624	0.669031	1.36791	0.313043	3.97378
					min	54.72	0.47	3.459	0.087	0.03	5.773	<0.01		16.049	16.01	<0.02	2.739	<0.01	99.829	82.4922	37.0746	51.7968	10.4602
					max	55.164	0.599	3.601	0.114	0.077	6.108	0.043		16.193	16.242	0.174	2.925	0.016	100.987	83.2088	37.7038	52.0018	11.0168
Cat-98: 5 measurements within 5 fragments
IMR CAGS	November 2024	2 µm	A7021	Cat-98	cat98_41	55.029	0.172	1.234	2.416	0.07	2.291	bdl		15.638	21.282	bdl	2.077	0.006	100.215	92.4055	47.4746	48.5363	3.98904
					cat98_42	55.014	0.21	1.174	2.316	0.069	2.099	bdl		15.966	21.323	0.109	1.991	bdl	100.274	93.1314	47.2002	49.1732	3.62662
					cat98_43	54.914	0.164	1.189	3.104	0.085	2.208	bdl		15.475	20.893	0.109	2.361	bdl	100.508	92.5889	47.3254	48.7709	3.90379
					cat98_44	55.154	0.124	1.22	2.401	0.051	2.244	0.019		15.53	21.207	bdl	2.152	0.005	100.118	92.5018	47.5854	48.4844	3.93017
					cat98_45	54.779	0.21	1.264	2.412	0.096	2.272	0.016		15.781	21.463	bdl	2.005	bdl	100.301	92.5269	47.4916	48.5844	3.924
					mean	54.978	0.176	1.2162	2.5298	0.0742	2.2228	<0.01		15.678	21.2336	0.0458	2.1172	<0.01	100.283	92.6309	47.4154	48.7098	3.87472
					2SD	0.280303	0.0719444	0.0716715	0.647173	0.0342754	0.151878			0.397827	0.423881	0.115736	0.301299		0.287887	0.574921	0.304339	0.561283	0.284553
					2RSD (%)	0.509846	40.8775	5.89307	25.582	46.1932	6.83271			2.53748	1.99628	252.698	14.231		0.287074	0.620658	0.641857	1.1523	7.34382
					min	54.779	0.124	1.174	2.316	0.051	2.099	<0.01		15.475	20.893	<0.02	1.991	<0.01	100.118	92.4055	47.2002	48.4844	3.62662
					max	55.154	0.21	1.264	3.104	0.096	2.291	0.019		15.966	21.463	0.109	2.361	0.006	100.508	93.1314	47.5854	49.1732	3.98904
Cat-100: 5 measurements within 5 fragments
IMR CAGS	November 2024	2 µm	A7021	Cat-100	cat100_46	54.747	0.288	4.183	0.497	0.023	4.416	0.023		17.311	15.371	0.174	2.67	0.014	99.717	87.4808	35.8269	56.1391	8.03397
					cat100_47	54.827	0.278	4.128	0.567	bdl	4.759	0.016		16.98	15.403	bdl	2.919	0.027	99.904	86.4132	36.0365	55.2729	8.69056
					cat100_48	55.079	0.305	4.024	0.515	0.016	4.816	bdl		17.209	15.451	bdl	2.753	0.031	100.199	86.4307	35.8045	55.4847	8.71087
					cat100_49	54.898	0.296	4.03	0.517	0.032	4.828	bdl		17.048	15.383	0.207	2.771	0.039	100.049	86.2907	35.8819	55.3279	8.79014
					cat100_50	54.832	0.359	4.048	0.488	0.027	4.611	0.008		16.65	15.271	bdl	2.828	0.025	99.147	86.5531	36.3283	55.1098	8.56185
					mean	54.8766	0.3052	4.0826	0.5168	0.0196	4.686	<0.01		17.0396	15.3758	0.0762	2.7882	0.0272	99.8032	86.6337	35.9756	55.4669	8.55748
					2SD	0.250338	0.0633624	0.139783	0.0611948	0.0248435	0.347733			0.507706	0.132109	0.209983	0.184929	0.0182428	0.815638	0.965139	0.433956	0.797922	0.607825
					2RSD (%)	0.456184	20.761	3.42386	11.8411	126.753	7.42067			2.97956	0.859201	275.568	6.63256	67.0691	0.817246	1.11405	1.20625	1.43856	7.10285
					min	54.747	0.278	4.024	0.488	<0.02	4.416	<0.01		16.65	15.271	<0.02	2.67	0.014	99.147	86.2907	35.8045	55.1098	8.03397
					max	55.079	0.359	4.183	0.567	0.032	4.828	0.023		17.311	15.451	0.207	2.919	0.039	100.199	87.4808	36.3283	56.1391	8.79014
06JY31-CPX: 5 measurements within 5 fragments
IMR CAGS	November 2024	2 µm	A7021	06JY31-CPX	06jy31_26	52.581	0.303	4.679	1.055	0.065	2.982	bdl		16.597	20.634	bdl	1.065	0.01	99.971	90.8435	44.8041	50.1419	5.05401
					06jy31_27	52.641	0.242	4.593	1.107	0.083	3.184	0.078		16.865	20.476	bdl	1.03	0.005	100.304	90.4231	44.1043	50.5427	5.35307
					06jy31_28	52.451	0.303	4.568	1.089	0.07	3.159	bdl		16.785	20.249	bdl	1.115	bdl	99.791	90.4502	43.9541	50.6936	5.35229
					06jy31_29	52.748	0.267	4.926	1.183	0.04	3.408	bdl		17.099	19.808	0.022	0.983	bdl	100.484	89.9433	42.82	51.4296	5.75042
					06jy31_30	52.399	0.309	4.675	0.968	0.067	2.887	bdl		16.374	20.919	bdl	0.936	bdl	99.534	90.9991	45.5212	49.5752	4.90359
					mean	52.564	0.2848	4.6882	1.0804	0.065	3.124	0.0156		16.744	20.4172	<0.02	1.0258	<0.01	100.017	90.5318	44.2407	50.4766	5.28268
					2SD	0.282963	0.0582821	0.283406	0.156803	0.031273	0.402261	0.0697653		0.548503	0.837663		0.139308		0.766119	0.824811	2.01901	1.37268	0.651598
					2RSD (%)	0.538321	20.4642	6.04509	14.5134	48.1123	12.8765	447.214		3.27582	4.10273		13.5805		0.765991	0.911073	4.56368	2.71945	12.3346
					min	52.399	0.242	4.568	0.968	0.04	2.887	<0.01		16.374	19.808	<0.02	0.936	<0.01	99.534	89.9433	42.82	49.5752	4.90359
					max	52.748	0.309	4.926	1.183	0.083	3.408	0.078		17.099	20.919	0.022	1.115	0.01	100.484	90.9991	45.5212	51.4296	5.75042
Cat–87: 53 measurements within 49 fragments
IGG CAS***	April 2025	focused	A6585	Cat–87	32 / 1 .	55.3709	0.3485	3.8586	0.6395	0.0347	4.7996	0.1271	0.0408	16.6644	15.42	bdl	2.8069	0.0147	100.139	86.09	36.4089	54.7456	8.8455
					33 / 1 .	55.8108	0.3616	3.8849	0.6606	0.0346	4.8268	0.1429	0.057	16.7013	15.4241	bdl	2.7623	0.0115	100.683	86.0488	36.3528	54.7677	8.87955
					34 / 1 .	56.1147	0.3604	3.9031	0.6743	0.0409	4.8024	0.1513	0.0373	16.9171	15.42	bdl	2.8011	0.0159	101.254	86.2624	36.1073	55.1154	8.77734
					35 / 1 .	55.4567	0.3547	3.8212	0.6431	0.0354	4.7091	0.1247	0.0581	16.7471	15.4814	bdl	2.6884	0.0144	100.141	86.3748	36.4628	54.8802	8.65708
					36 / 1 .	56.1646	0.3463	3.8924	0.6511	0.0414	4.8518	0.1667	0.0482	16.6657	15.4172	bdl	2.8771	0.0121	101.12	85.9609	36.3681	54.6985	8.93332
					37 / 1 .	55.7499	0.3599	3.8928	0.6557	0.0291	4.7003	0.1608	0.051	16.7851	15.4506	bdl	2.7847	0.0154	100.642	86.4234	36.3772	54.985	8.63781
					38 / 1 .	55.3235	0.3478	3.8905	0.6584	0.0386	4.8152	0.1574	0.0455	16.5875	15.3023	bdl	2.8039	0.0145	99.9946	85.9955	36.3132	54.7678	8.919
					39 / 1 .	55.9676	0.3524	3.9806	0.6555	0.0395	4.7533	0.1218	0.0583	16.3926	15.5039	bdl	2.8285	0.0123	100.667	86.009	36.8948	54.2761	8.82905
					40 / 1 .	55.625	0.3619	3.9778	0.6509	0.0369	4.815	0.1811	0.0414	16.662	15.2227	bdl	2.9892	0.0175	100.594	86.0499	36.1038	54.9826	8.91358
					41 / 1 .	55.1907	0.3489	4.0017	0.653	0.0208	4.7837	0.1596	0.0449	16.5659	15.4304	bdl	2.7656	0.0091	99.9815	86.0588	36.5535	54.6013	8.84524
					42 / 1 .	55.0636	0.3563	3.8345	0.6818	0.0394	4.7561	0.1527	0.0432	16.8524	15.4303	bdl	2.8257	0.015	100.044	86.3316	36.2297	55.054	8.71636
					43 / 1 .	55.2876	0.3649	3.9307	0.6833	0.0427	4.7903	0.107	0.0674	16.6829	15.4146	bdl	2.8995	0.0109	100.286	86.1265	36.3849	54.7895	8.82563
					44 / 1 .	54.5007	0.3555	3.6979	0.6449	0.0347	4.6891	0.1464	0.0471	16.5265	15.1795	bdl	2.8773	0.0162	98.7189	86.2685	36.2854	54.9657	8.74899
					45 / 1 .	54.7032	0.3514	3.8419	0.6278	0.0248	4.7853	0.1726	0.058	16.4261	15.4019	bdl	2.7862	0.017	99.195	85.9527	36.6786	54.4264	8.89492
					46 / 1 .	54.9877	0.3483	3.9909	0.6379	0.0351	4.6927	0.1333	0.053	16.6385	15.3529	bdl	2.843	0.0127	99.7234	86.3393	36.4109	54.9024	8.68675
					47 / 1 .	55.5143	0.3653	3.9631	0.6331	0.0415	4.8559	0.1088	0.0506	16.7315	15.7247	bdl	2.8897	0.0114	100.878	85.9983	36.7448	54.3983	8.85682
					48 / 1 .	54.8869	0.3433	3.966	0.6435	0.0221	4.7518	0.1579	0.0404	16.4497	15.4299	bdl	2.7295	0.0118	99.4376	86.0546	36.715	54.4597	8.82536
					49 / 1 .	56.1935	0.3527	4.0137	0.6741	0.0404	4.7292	0.133	0.0414	16.5038	15.4898	bdl	2.8665	0.0162	101.044	86.1509	36.7547	54.4864	8.7589
					50 / 1 .	54.5536	0.365	3.927	0.6716	0.0313	4.7432	0.14	0.0516	16.1795	15.3936	bdl	2.8159	0.0178	98.8743	85.8766	36.9974	54.1045	8.8981
					51 / 1 .	55.3861	0.3517	3.9564	0.702	0.039	4.8553	0.1172	0.0559	16.5305	15.3437	bdl	2.8237	0.0118	100.165	85.8536	36.4171	54.5882	8.99469
					112 / 1 .	56.1631	0.3589	3.9692	0.6842	0.0305	4.7834	0.1039	0.0624	16.6601	15.2307	bdl	2.8788	0.0125	100.943	86.1274	36.1393	55.0015	8.85914
					113 / 1 .	55.768	0.3502	3.8931	0.6436	0.0273	4.7232	0.1382	0.0727	16.7498	15.3923	bdl	2.7976	0.0118	100.55	86.3415	36.3165	54.9853	8.69823
					115 / 1 .	55.8034	0.3621	4.0094	0.6459	0.0431	4.8705	0.157	0.0498	16.7586	15.0616	bdl	2.9011	0.0133	100.671	85.9816	35.7077	55.2796	9.01277
					116 / 1 .	56.2992	0.3541	3.9256	0.6453	0.0438	4.7331	0.1204	0.0458	16.4648	15.2842	bdl	2.7171	0.0107	100.644	86.1128	36.4892	54.6909	8.81987
					118 / 1 .	55.1834	0.3403	3.7887	0.6447	0.0348	4.8479	0.1463	0.0404	16.7118	15.0998	bdl	2.896	0.0127	99.7722	86.0039	35.8361	55.1835	8.98043
					123 / 1 .	55.076	0.3421	3.924	0.6752	0.0288	4.7169	0.1246	0.0487	16.4745	15.1741	bdl	2.95	0.0154	99.5454	86.1608	36.3211	54.8662	8.81266
					124 / 1 .	56.0812	0.3493	3.7832	0.6827	0.0487	4.769	0.1208	0.0594	16.7652	15.4438	bdl	2.6587	0.0144	100.77	86.2382	36.3448	54.8951	8.76011
					126 / 1 .	56.0307	0.3599	4.0133	0.6488	0.0298	4.8241	0.1505	0.0559	16.8595	15.1151	bdl	2.9125	0.0114	101.017	86.1683	35.701	55.4053	8.89366
					127 / 1 .	54.6186	0.3423	3.803	0.6395	0.037	4.7256	0.1219	0.0512	16.3608	14.9876	bdl	2.8198	0.018	98.5422	86.0559	36.1672	54.9319	8.90091
					128 / 1 .	56.2751	0.3624	3.9696	0.6505	0.0442	4.8584	0.1374	0.0597	16.7456	15.435	bdl	3.0005	0.0057	101.543	86.0022	36.2953	54.7874	8.91726
					129 / 1 .	55.9589	0.3532	3.934	0.6578	0.0434	4.8707	0.1803	0.0471	16.5947	15.3746	bdl	2.7787	0.0116	100.819	85.8622	36.3763	54.6287	8.99499
					130 / 1 .	55.5764	0.3413	3.7774	0.6495	0.0292	4.801	0.136	0.0358	16.7515	15.4275	bdl	2.7091	0.016	100.268	86.1489	36.3153	54.8636	8.82105
					131 / 1 .	55.6925	0.3628	3.9995	0.6703	0.0225	4.8214	0.1532	0.0402	16.7192	15.2832	bdl	2.7437	0.0166	100.516	86.0751	36.123	54.9822	8.89482
					132 / 1 .	55.4662	0.3503	3.9135	0.663	0.0373	4.7666	0.1413	0.0559	16.5518	15.289	bdl	2.8301	0.0143	100.095	86.0915	36.3687	54.7811	8.85018
					133 / 1 .	56.2389	0.3573	3.9667	0.6466	0.0321	4.7729	0.1188	0.0491	16.3532	15.3607	bdl	2.8184	0.0133	100.729	85.9303	36.7137	54.3821	8.90417
					134 / 1 .	55.1797	0.3532	3.8027	0.6677	0.0331	4.7793	0.1432	0.0543	16.6163	15.1968	bdl	2.88	0.0097	99.7099	86.1062	36.143	54.9848	8.87218
					135 / 1 .	55.0171	0.3519	3.8431	0.6518	0.0444	4.7974	0.1535	0.0382	16.4541	15.2867	bdl	2.7753	0.0167	99.4394	85.9428	36.4623	54.6061	8.93162
					136 / 1 .	56.1603	0.352	4.0078	0.6493	0.0346	4.7428	0.136	0.0493	16.6709	15.3646	bdl	2.8124	0.0116	101.004	86.2366	36.3559	54.8845	8.75958
					137 / 1 .	55.609	0.3395	3.958	0.6254	0.0385	4.635	0.1677	0.0429	16.1858	15.1568	bdl	2.8068	0.0122	99.5748	86.1588	36.704	54.5351	8.76092
					138 / 1 .	55.8818	0.3578	3.8198	0.6481	0.0258	4.8716	0.1241	0.0493	16.8098	15.3702	bdl	2.6752	0.0092	100.645	86.0156	36.1133	54.9525	8.93417
					140 / 1 .	56.0643	0.3579	4.0109	0.6889	0.0395	4.7448	0.1173	0.0599	16.4689	15.2862	bdl	2.7876	0.0091	100.642	86.0862	36.4793	54.6825	8.83812
					141 / 1 .	55.4151	0.3467	3.8106	0.6273	0.0282	4.6915	0.1554	0.0516	16.4486	15.0775	bdl	2.7606	0.0139	99.4394	86.2063	36.2221	54.9806	8.79731
					142 / 1 .	56.1338	0.3566	3.922	0.6565	0.0297	4.7128	0.1547	0.0507	16.6997	15.3745	bdl	2.8367	0.0149	100.94	86.3321	36.3565	54.9448	8.6987
					143 / 1 .	55.7667	0.3476	3.9844	0.6733	0.034	4.7344	0.13	0.0452	16.612	15.1737	bdl	2.7677	0.0139	100.276	86.2156	36.1432	55.0546	8.80226
					144 / 1 .	56.0426	0.3662	4.044	0.683	0.032	4.7791	0.1246	0.0428	16.8152	15.3868	bdl	2.8697	0.0138	101.207	86.2484	36.1932	55.0323	8.77444
					145 / 1 .	56.0719	0.3566	3.9854	0.6896	0.0277	4.8365	0.1459	0.0506	16.8348	15.2855	bdl	2.9067	0.0178	101.213	86.1201	35.9797	55.1344	8.88594
					146 / 1 .	56.3054	0.3483	3.9215	0.6449	0.0223	4.7372	0.1167	0.053	16.691	15.3691	bdl	2.8795	0.0137	101.121	86.2649	36.3424	54.9142	8.74342
			A7021		52 / 1 .	56.0569	0.3672	3.8731	0.6994	0.0443	4.748	0.0988	0.0487	16.6109	15.1843	bdl	2.7781	0.0097	100.52	86.1807	36.1515	55.0251	8.8234
					56 / 1 .	55.6111	0.3603	3.9481	0.6549	0.0377	4.7801	0.1447	0.0542	16.6672	15.5537	bdl	2.6946	0.0148	100.532	86.1407	36.6188	54.5971	8.78418
					98 / 1 .	55.2713	0.3481	3.8892	0.657	0.0387	4.7487	0.1185	0.0694	16.6797	15.1976	bdl	2.7243	0.0181	99.7651	86.2281	36.089	55.1093	8.80174
					99 / 1 .	55.3511	0.3536	3.9094	0.6669	0.038	4.6981	0.1351	0.0399	16.6036	15.2497	bdl	2.9336	0.0158	99.9769	86.3009	36.2931	54.9796	8.72729
					100 / 1 .	55.5144	0.3621	3.9448	0.6621	0.0266	4.7715	0.1456	0.0493	16.6239	15.3445	bdl	2.7591	0.0148	100.234	86.1312	36.3627	54.8116	8.82576
					101 / 1 .	55.1258	0.346	3.8884	0.6731	0.0402	4.7348	0.1372	0.0529	16.7079	15.1655	bdl	2.9454	0.0145	99.8261	86.2829	36.0159	55.2073	8.77675
					mean	55.5974	0.353866	3.91432	0.658658	0.0349189	4.77235	0.138904	0.0503283	16.6213	15.3248	<0.04	2.82019	0.0135868	100.303	86.1269	36.3359	54.832	8.83211
					2SD	0.984807	0.0145867	0.152174	0.0365276	0.0134743	0.110617	0.0385103	0.0162302	0.320358	0.278051		0.157365	0.00538246	1.36316	0.276313	0.528367	0.523788	0.174356
					2RSD (%)	1.77132	4.12209	3.88763	5.54576	38.5875	2.31788	27.7244	32.2486	1.92739	1.81438		5.57995	39.6154	1.35903	0.320821	1.45412	0.95526	1.97411
					min	54.5007	0.3395	3.6979	0.6254	0.0208	4.635	0.0988	0.0358	16.1795	14.9876	<0.04	2.6587	0.0057	98.5422	85.8536	35.701	54.1045	8.63781
					max	56.3054	0.3672	4.044	0.702	0.0487	4.8716	0.1811	0.0727	16.9171	15.7247	<0.04	3.0005	0.0181	101.543	86.4234	36.9974	55.4053	9.01277
Cat-86: 3 measurements within 3 fragments
IGG CAS	April 2025	focused	A7021	Cat-86	57 / 1 .	55.2175	0.3278	3.4763	0.6071	0.0294	4.867	0.1212	0.0607	17.2941	15.7374	bdl	2.3621	0.0175	100.11	86.3649	36.0962	55.1904	8.71334
					58 / 1 .	55.649	0.3216	3.4631	0.599	0.0249	4.838	0.1373	0.0503	17.0574	15.6278	bdl	2.4586	0.021	100.261	86.2727	36.2284	55.0175	8.7541
					61 / 1 .	55.1632	0.3142	3.5811	0.5229	0.0347	4.8396	0.1392	0.0582	16.8871	15.5362	bdl	2.5644	0.0091	99.638	86.1495	36.2914	54.8846	8.82395
					mean	55.3432	0.3212	3.50683	0.576333	0.0296667	4.8482	0.132567	0.0564	17.0795	15.6338	<0.04	2.4617	0.0158667	100.003	86.2624	36.2054	55.0308	8.7638
					2SD	0.53238	0.0136176	0.129309	0.092903	0.00981088	0.0326018	0.0197791	0.0108573	0.408801	0.201468		0.202371	0.0122317	0.649962	0.216127	0.199211	0.306649	0.111873
					2RSD (%)	0.96196	4.23961	3.68735	16.1197	33.0704	0.672452	14.9201	19.2505	2.39352	1.28867		8.22079	77.0902	0.649943	0.250546	0.550224	0.557231	1.27654
					min	55.1632	0.3142	3.4631	0.5229	0.0249	4.838	0.1212	0.0503	16.8871	15.5362	<0.04	2.3621	0.0091	99.638	86.1495	36.0962	54.8846	8.71334
					max	55.649	0.3278	3.5811	0.6071	0.0347	4.867	0.1392	0.0607	17.2941	15.7374	<0.04	2.5644	0.021	100.261	86.3649	36.2914	55.1904	8.82395
Cat-88: 4 measurements within 4 fragments
IGG CAS	April 2025	focused	A7021	Cat-88	62 / 1 .	54.8626	0.2438	1.8967	0.6068	0.0489	4.1784	0.1361	bdl	15.7079	20.5155	bdl	1.8659	0.0109	100.099	87.015	44.9585	47.8944	7.14717
					63 / 1 .	54.9789	0.2621	1.8641	0.6247	0.0509	4.0697	0.1025	0.0274	15.7236	20.5446	bdl	1.8144	0.0079	100.053	87.321	45.0557	47.9779	6.96641
					64 / 1 .	54.9567	0.2403	1.8374	0.5694	0.052	4.1893	0.103	0.0195	15.8649	20.6355	bdl	1.9268	bdl	100.389	87.0977	44.8802	48.008	7.11174
					66 / 1 .	54.4369	0.2548	1.9392	0.6006	0.0593	4.1012	0.113	0.0285	15.6856	20.4914	bdl	1.8664	0.0087	99.5796	87.2084	45.0195	47.9476	7.0329
					mean	54.8088	0.25025	1.88435	0.600375	0.052775	4.13465	0.11365	0.021025	15.7455	20.5467	<0.04	1.86837	0.00735	100.03	87.1605	44.9785	47.957	7.06455
					2SD	0.505981	0.0200576	0.0877528	0.0460795	0.00907065	0.116837	0.0314573	0.0182847	0.162225	0.126076		0.0919189	0.00769675	0.670246	0.266256	0.153642	0.0969784	0.16201
					2RSD (%)	0.923175	8.01502	4.65692	7.67511	17.1874	2.82579	27.6791	86.9664	1.0303	0.613606		4.91972	104.718	0.670045	0.305478	0.34159	0.20222	2.29328
					min	54.4369	0.2403	1.8374	0.5694	0.0489	4.0697	0.1025	<0.02	15.6856	20.4914	<0.04	1.8144	<0.01	99.5796	87.015	44.8802	47.8944	6.96641
					max	54.9789	0.2621	1.9392	0.6247	0.0593	4.1893	0.1361	0.0285	15.8649	20.6355	<0.04	1.9268	0.0109	100.389	87.321	45.0557	48.008	7.14717
Cat-89: 3 measurements within 3 fragments
IGG CAS	April 2025	focused	A7021	Cat-89	67 / 1 .	55.7351	0.2938	2.8295	0.6017	0.0253	4.6477	0.1452	0.0681	18.4955	15.3894	bdl	1.9528	0.0227	100.235	87.6446	34.3891	57.5045	8.10646
					68 / 1 .	56.3115	0.2926	2.875	0.6257	0.0263	4.6274	0.1935	0.064	18.7599	15.3466	bdl	2.0517	0.0212	101.213	87.8444	34.0581	57.9262	8.01566
					71 / 1 .	56.0672	0.2964	2.8391	0.6026	0.0327	4.7652	0.1412	0.0535	18.3944	15.2606	bdl	1.9807	0.0174	100.472	87.3111	34.2373	57.4182	8.34455
					mean	56.0379	0.294267	2.84787	0.61	0.0281	4.6801	0.159967	0.0618667	18.5499	15.3322	<0.04	1.99507	0.0204333	100.64	87.6	34.2281	57.6163	8.15556
					2SD	0.578625	0.00388501	0.0479668	0.0272081	0.00802994	0.148789	0.058219	0.0150603	0.377464	0.131193		0.101982	0.00546382	1.02073	0.538787	0.331358	0.543717	0.339699
					2RSD (%)	1.03256	1.32024	1.68431	4.46034	28.5763	3.17918	36.3945	24.3432	2.03485	0.855668		5.11173	26.7397	1.01424	0.615054	0.968087	0.943686	4.16524
					min	55.7351	0.2926	2.8295	0.6017	0.0253	4.6274	0.1412	0.0535	18.3944	15.2606	<0.04	1.9528	0.0174	100.235	87.3111	34.0581	57.4182	8.01566
					max	56.3115	0.2964	2.875	0.6257	0.0327	4.7652	0.1935	0.0681	18.7599	15.3894	<0.04	2.0517	0.0227	101.213	87.8444	34.3891	57.9262	8.34455
Cat-90: 5 measurements within 5 fragments
IGG CAS	April 2025	focused	A7021	Cat-90	72 / 1 .	55.8254	0.4686	3.5432	0.0483	0.051	6.1158	0.1696	0.0234	15.9073	16.127	bdl	2.6978	0.0154	100.986	82.2583	37.4757	51.4315	11.0929
					73 / 1 .	55.7415	0.4744	3.4614	0.048	0.0353	6.0222	0.2023	0.0193	15.7325	16.0876	bdl	2.7367	0.0116	100.586	82.3221	37.6957	51.2902	11.0141
					74 / 1 .	55.4237	0.4578	3.4643	0.0543	0.0456	6.0471	0.1535	0.0159	15.7749	16.2359	bdl	2.7189	0.0107	100.405	82.3012	37.8421	51.1567	11.0012
					75 / 1 .	55.2041	0.4652	3.4987	0.063	0.0681	5.9415	0.1815	bdl	15.6539	16.0309	bdl	2.7144	0.0083	99.8459	82.4452	37.7655	51.3093	10.9252
					76 / 1 .	54.8842	0.4718	3.5356	0.0478	0.0461	6.0321	0.1766	0.0157	16.0675	16.2463	bdl	2.7822	bdl	100.307	82.603	37.5116	51.6173	10.8711
					mean	55.4158	0.46756	3.50064	0.05228	0.04922	6.03174	0.1767	0.0178	15.8272	16.1455	<0.04	2.73	0.01006	100.426	82.386	37.6581	51.361	10.9809
					2SD	0.775455	0.0129102	0.0767964	0.0131616	0.0240047	0.124645	0.0355958	0.00715821	0.325417	0.187512		0.0645998	0.00822022	0.830827	0.279606	0.318686	0.34656	0.170919
					2RSD (%)	1.39934	2.76118	2.19378	25.1752	48.7703	2.06649	20.1448	40.2147	2.05606	1.16138		2.36629	81.7119	0.827303	0.339386	0.846262	0.674752	1.55652
					min	54.8842	0.4578	3.4614	0.0478	0.0353	5.9415	0.1535	<0.02	15.6539	16.0309	<0.04	2.6978	<0.01	99.8459	82.2583	37.4757	51.1567	10.8711
					max	55.8254	0.4744	3.5432	0.063	0.0681	6.1158	0.2023	0.0234	16.0675	16.2463	<0.04	2.7822	0.0154	100.986	82.603	37.8421	51.6173	11.0929
Cat-91: 5 measurements within 5 fragments
IGG CAS	April 2025	focused	A7021	Cat-91	77 / 1 .	55.565	0.5013	3.5783	0.1009	0.0427	5.8733	0.1736	0.0218	15.8063	16.3682	bdl	2.7313	0.0103	100.772	82.7504	38.1146	51.2104	10.675
					78 / 1 .	55.7466	0.5119	3.5621	0.0926	0.0444	5.8361	0.1792	0.0382	15.7158	16.2371	bdl	2.7567	0.008	100.729	82.7591	38.0629	51.2586	10.6785
					79 / 1 .	55.3814	0.5014	3.5893	0.099	0.0528	5.8531	0.1975	0.0231	15.8432	16.1787	bdl	2.7789	0.013	100.514	82.8327	37.8089	51.5146	10.6765
					80 / 1 .	55.574	0.5049	3.6403	0.094	0.0499	5.8773	0.1937	0.0166	15.8843	16.294	bdl	2.8395	0.0095	100.989	82.8108	37.9088	51.4182	10.673
					81 / 1 .	55.053	0.5065	3.5855	0.0949	0.0483	5.8245	0.2171	0.0192	15.8337	16.2398	bdl	2.8039	0.0083	100.222	82.8937	37.929	51.4529	10.618
					mean	55.464	0.5052	3.5911	0.09628	0.04762	5.85286	0.19222	0.02378	15.8167	16.2636	<0.04	2.78206	0.00982	100.645	82.8093	37.9649	51.3709	10.6642
					2SD	0.527169	0.00873613	0.0588224	0.00702766	0.00818951	0.0458296	0.0341366	0.0168774	0.125897	0.142625		0.083702	0.00400849	0.580842	0.116907	0.246573	0.260757	0.0517834
					2RSD (%)	0.950471	1.72924	1.63801	7.29919	17.1976	0.783029	17.7591	70.9733	0.795975	0.876963		3.00864	40.8197	0.577117	0.141176	0.649477	0.507597	0.485582
					min	55.053	0.5013	3.5621	0.0926	0.0427	5.8245	0.1736	0.0166	15.7158	16.1787	<0.04	2.7313	0.008	100.222	82.7504	37.8089	51.2104	10.618
					max	55.7466	0.5119	3.6403	0.1009	0.0528	5.8773	0.2171	0.0382	15.8843	16.3682	<0.04	2.8395	0.013	100.989	82.8937	38.1146	51.5146	10.6785
Cat-98: 4 measurements within 4 fragments
IGG CAS	April 2025	focused	A7021	Cat-98	87 / 1 .	55.167	0.1785	1.2939	2.3505	0.0507	2.1797	bdl	0.0328	15.472	21.5702	bdl	2.0658	bdl	100.334	92.6756	48.1494	48.0529	3.79776
					89 / 1 .	55.5544	0.1916	1.2835	2.7707	0.0477	2.1186	bdl	0.0337	15.3077	21.0534	bdl	2.2185	bdl	100.533	92.7952	47.8427	48.3994	3.75783
					90 / 1 .	55.538	0.183	1.2227	2.4732	0.0549	2.1552	bdl	0.0296	15.5721	21.3568	bdl	1.9378	bdl	100.446	92.7952	47.7724	48.4647	3.7629
					91 / 1 .	56.0197	0.1708	1.2759	2.4416	0.0442	2.0773	bdl	0.0409	15.5879	21.587	bdl	2.0274	bdl	101.234	93.044	48.0815	48.307	3.61143
					mean	55.5698	0.180975	1.269	2.509	0.049375	2.1327	<0.06	0.03425	15.4849	21.3918	<0.04	2.06238	<0.01	100.637	92.8275	47.9615	48.306	3.73248
					2SD	0.69848	0.0173838	0.0634724	0.364113	0.0090824	0.0893176		0.00953939	0.257628	0.497553		0.234176		0.811978	0.309952	0.364323	0.361425	0.165255
					2RSD (%)	1.25694	9.60564	5.00177	14.5123	18.3947	4.188		27.8522	1.66373	2.3259		11.3547		0.80684	0.333902	0.759615	0.748199	4.42747
					min	55.167	0.1708	1.2227	2.3505	0.0442	2.0773	<0.06	0.0296	15.3077	21.0534	<0.04	1.9378	<0.01	100.334	92.6756	47.7724	48.0529	3.61143
					max	56.0197	0.1916	1.2939	2.7707	0.0549	2.1797	<0.06	0.0409	15.5879	21.587	<0.04	2.2185	<0.01	101.234	93.044	48.1494	48.4647	3.79776
Cat-100: 5 measurements within 5 fragments
IGG CAS	April 2025	focused	A7021	Cat-100	92 / 1 .	55.7476	0.3021	4.2207	0.5273	0.0335	4.692	0.1565	0.0542	17.0227	15.5054	bdl	2.7072	0.0144	100.995	86.608	36.1834	55.2703	8.54631
					93 / 1 .	54.8983	0.2918	4.1567	0.5144	0.0301	4.7544	0.1564	0.0598	16.6804	15.4588	bdl	2.6416	0.02	99.666	86.2144	36.4783	54.7648	8.75687
					94 / 1 .	55.255	0.3016	4.1153	0.5678	0.026	4.53	0.1034	0.0668	16.9344	15.5216	bdl	2.6767	0.0241	100.114	86.9514	36.4193	55.2843	8.29637
					95 / 1 .	54.6637	0.2975	4.0858	0.5322	0.0418	4.6169	0.1365	0.06	16.7389	15.2004	bdl	2.7224	0.0198	99.1035	86.6002	36.1108	55.3281	8.56105
					96 / 1 .	55.7328	0.3003	4.1693	0.5492	0.0303	4.7833	0.1381	0.0734	17.0571	15.6542	bdl	2.6115	0.0185	101.127	86.4066	36.3037	55.0379	8.65848
					mean	55.2595	0.29866	4.14956	0.53818	0.03234	4.67532	0.13818	0.06284	16.8867	15.4681	<0.04	2.67188	0.01936	100.201	86.5561	36.2991	55.1371	8.56382
					2SD	0.973508	0.00846002	0.103637	0.0414537	0.0118411	0.206694	0.0433598	0.0148038	0.337953	0.332621		0.0915731	0.00695787	1.72819	0.547762	0.308896	0.473627	0.343617
					2RSD (%)	1.7617	2.83266	2.49754	7.70257	36.6145	4.42096	31.3792	23.5579	2.00129	2.15037		3.42729	35.9394	1.72473	0.632841	0.850975	0.858999	4.01243
					min	54.6637	0.2918	4.0858	0.5144	0.026	4.53	0.1034	0.0542	16.6804	15.2004	<0.04	2.6115	0.0144	99.1035	86.2144	36.1108	54.7648	8.29637
					max	55.7476	0.3021	4.2207	0.5678	0.0418	4.7833	0.1565	0.0734	17.0571	15.6542	<0.04	2.7224	0.0241	101.127	86.9514	36.4783	55.3281	8.75687
06JY31-CPX: 4 measurements within 4 fragments
IGG CAS	April 2025	focused	A7021	06JY31-CPX	103 / 1 .	53.137	0.3038	4.7302	1.0636	0.0336	2.9591	bdl	0.062	16.1999	20.5071	bdl	1.0315	bdl	100.049	90.7053	45.2131	49.6946	5.0923
					104 / 1 .	53.0751	0.277	4.628	1.1103	0.0361	2.9949	bdl	0.05	16.4694	19.9275	bdl	1.1021	bdl	99.7287	90.7429	44.1071	50.7189	5.17406
					105 / 1 .	53.0963	0.2856	4.8901	1.1695	0.0252	3.0738	0.0738	0.0458	16.7386	19.877	bdl	1.2139	0.0063	100.494	90.6603	43.6229	51.1116	5.26543
					106 / 1 .	53.5388	0.3252	4.7778	1.0346	0.0409	2.7723	0.0794	0.0658	16.2409	20.9823	bdl	1.0986	bdl	100.969	91.2608	45.87	49.3995	4.73053
					mean	53.2118	0.2979	4.75652	1.0945	0.03395	2.95002	0.061025	0.0559	16.4122	20.3235	<0.04	1.11153	<0.01	100.31	90.8423	44.7033	50.2311	5.06558
					2SD	0.439016	0.0427114	0.217582	0.117856	0.0131458	0.255611	0.0384577	0.0190452	0.495612	1.04811		0.151176		1.07921	0.562032	2.04737	1.63002	0.468586
					2RSD (%)	0.825035	14.3375	4.5744	10.768	38.7212	8.66469	63.0196	34.0701	3.01978	5.15715		13.6007		1.07588	0.618689	4.5799	3.24504	9.25039
					min	53.0751	0.277	4.628	1.0346	0.0252	2.7723	<0.06	0.0458	16.1999	19.877	<0.04	1.0315	<0.01	99.7287	90.6603	43.6229	49.3995	4.73053
					max	53.5388	0.3252	4.8901	1.1695	0.0409	3.0738	0.0794	0.0658	16.7386	20.9823	<0.04	1.2139	0.0063	100.969	91.2608	45.87	51.1116	5.26543
Average detection limits for oxides (calculated), wt%
Laboratory	Date	Beam size				SiO2	TiO2	Al2O3	Cr2O3	V2O3	FeO	MnO	NiO	MgO	CaO	ZnO	Na2O	K2O
LMU Munich	November 2018	focused				0.05	0.08	0.04	0.07		0.08	0.08		0.04	0.06		0.04	0.03
IMR CAGS	November 2024	2 µm				0.02	0.04	0.01	0.02	0.02	0.01	0.01		0.01	0.01	0.02	0.01	0.01
IGG CAS	April 2025	focused				0.08	0.02	0.04	0.02	0.02	0.04	0.06	0.02	0.1	0.03	0.04	0.08	0.01
# bdl: below detection limit
* LMU Munich: Ludwig-Maximilians-Universität München.
** IMR CAGS: Institute of Geology, Chinese Academy of Geological Sciences.
*** IGG CAS: Institute of Geology and Geophysics, Chinese Academy of Sciences.
Mg# = Mg-number = mol% Mg/(Mg + Fe)
Wo = mol% Ca/(Mg + Fe + Ca)
En = mol% Mg/(Mg + Fe + Ca)
Fs = mol% Fe/(Mg + Fe + Ca)

## Sheet: Table S3 EPMA summary
Supplementary Table S3
Summary of major and minor element compositions (wt.%) for Cat–87 clinopyroxene, seven other clinopyroxene samples from the Catoca kimberlite, and clinopyroxene reference material 06JY31-CPX
Sample type	Host volcanic rock	Sample ID	Laboratory (this study) / Reference		SiO2	TiO2	Al2O3	Cr2O3	V2O3	FeO	MnO#	NiO	MgO	CaO	ZnO#	Na2O	K2O	Total		Mg# (mol%)	Wo (mol%)	En (mol%)	Fs (mol%)		Matrix-matched with Cat–87		P (GPa)	T (°C)		Group	Adjective	Pyroxene name	enstatite	ferrosillite	wollastonite	jadeite	aegirine	Quad
																											Nimis and Taylor29 and 40 mW/m2 geotherm			Pyroxene classification follows Morimoto10 and chemical component calculations were performed using PX-NOM (Sturm22). Calculations of Fe3+ were done following Droop (1987).
Kimberlite-borne Cpx Megacryst	Catoca kimberlite pipe, Angola	Cat–87	LMU Munich*	Mean (n = 21)	54.638	0.338052	3.75605	0.672481		4.78856	0.126171		17.0899	15.1952		2.92855	<0.03	99.5482		86.4163	35.5768	55.6722	8.75105							Ca-Na	chromian	omphacite	----------	----------	----------	12.2419	8.48661	79.2714
			IMR CAGS**	Mean (n = 28)	55.044	0.354429	3.82721	0.658	0.0341786	4.82875	0.0179286		16.8545	15.3146	0.10425	2.97179	0.015	100.025		86.1532	36.0055	55.1333	8.86118							Ca-Na	chromian	omphacite	----------	----------	----------	13.9721	6.87719	79.1507
			IGG CAS***	Mean (n = 53)	55.5974	0.353866	3.91432	0.658658	0.0349189	4.77235	0.138904	0.0503283	16.6213	15.3248	<0.04	2.82019	0.0135868	100.303		86.1272	36.3355	54.8325	8.83205							Quad (Ca-Mg-Fe)	aluminian chromian sodian	augite	54.6909	9.06871	36.2404	----------	----------	----------
				Grand mean	55.0931	0.348782	3.83253	0.663046	0.0345487	4.79655	0.132538	0.0503283	16.8553	15.2782		2.90684	0.0142934	100.006		86.2334	35.971	55.2143	8.81462				5.2182	1187.1		Ca-Na	chromian	omphacite	----------	----------	----------	14.2895	6.14337	79.5671
Kimberlite-borne Cpx Megacryst	Catoca kimberlite pipe, Angola	Cat-86	LMU Munich	Mean (n = 21)	54.621	0.3295	3.4138	0.601705		4.77348	0.123562		17.6175	15.4636		2.60304	<0.03	99.5646		86.8054	35.3845	56.0898	8.52573		yes					Quad (Ca-Mg-Fe)	aluminian chromian sodian	augite	55.9654	8.72965	35.3049	----------	----------	----------
			IMR CAGS	Mean (n = 5)	55.0876	0.3262	3.4632	0.541	0.0564	4.9708	0.0188		17.213	15.5306	0.1778	2.5852	0.0186	99.9892		86.0582	35.818	55.2339	8.94815							Quad (Ca-Mg-Fe)	aluminian chromian sodian	augite	55.2347	8.94806	35.8173	----------	----------	----------
			IGG CAS	Mean (n = 3)	55.3432	0.3212	3.50683	0.576333	0.0296667	4.8482	0.132567	0.0564	17.0795	15.6338	<0.04	2.4617	0.0158667	100.003		86.2631	36.2047	55.0318	8.76346							Quad (Ca-Mg-Fe)	aluminian chromian sodian	augite	54.8993	8.98427	36.1164	----------	----------	----------
				Grand mean	55.0173	0.325633	3.46128	0.573013	0.0430333	4.86416	0.128064	0.0564	17.3033	15.5427		2.54998	0.0172333	99.8821		86.3781	35.8008	55.4541	8.74518				5.3944	1218.3		Quad (Ca-Mg-Fe)	aluminian chromian sodian	augite	55.3258	8.9574	35.7168	----------	----------	----------
Kimberlite-borne Cpx Megacryst	Catoca kimberlite pipe, Angola	Cat-88	LMU Munich	Mean (n = 19)	54.3403	0.261932	1.93221	0.701663		4.17668	0.103589		15.8915	20.2179		2.12375	<0.03	99.7639		87.1503	44.3486	48.5004	7.15103		no					Quad (Ca-Mg-Fe)	chromian sodian	augite	48.4142	7.31747	44.2684	----------	----------	----------
			IMR CAGS	Mean (n = 5)	54.8752	0.2412	1.848	0.6022	0.0666	4.276	<0.01		15.8834	20.2836	0.102	1.9714	0.0146	100.175		86.879	44.3643	48.3358	7.29996							Quad (Ca-Mg-Fe)	chromian sodian	augite	48.3365	7.29991	44.3635	----------	----------	----------
			IGG CAS	Mean (n = 4)	54.8088	0.25025	1.88435	0.600375	0.052775	4.13465	0.11365	0.021025	15.7455	20.5467	<0.04	1.86837	0.00735	100.03		87.1602	44.9783	47.9571	7.06468							Quad (Ca-Mg-Fe)	chromian sodian	augite	47.8637	7.24705	44.8892	----------	----------	----------
				Grand mean	54.6748	0.251127	1.88819	0.634746	0.0596875	4.19578	0.10862	0.021025	15.8401	20.3494		1.98784	0.010975	100.022		87.0627	44.5638	48.2643	7.17194				3.2259	829.579		Quad (Ca-Mg-Fe)	chromian sodian	augite	48.1745	7.34612	44.4794	----------	----------	----------
Kimberlite-borne Cpx Megacryst	Catoca kimberlite pipe, Angola	Cat-89	LMU Munich	Mean (n = 21)	54.9145	0.285781	2.79604	0.633267		4.67257	0.127205		19.0313	15.2649		2.12355	0.0275667	99.8767		87.8939	33.6296	58.3356	8.03484		yes					Quad (Ca-Mg-Fe)	aluminian chromian sodian	augite	58.2074	8.23804	33.5546	----------	----------	----------
			IMR CAGS	Mean (n = 5)	55.187	0.3116	2.8062	0.6328	0.0606	4.8092	0.0178		18.884	15.2208	0.0806	2.0658	0.031	100.107		87.4991	33.638	58.0662	8.29583							Quad (Ca-Mg-Fe)	aluminian chromian sodian	augite	58.0669	8.29574	33.6373	----------	----------	----------
			IGG CAS	Mean (n = 3)	56.0379	0.294267	2.84787	0.61	0.0281	4.6801	0.159967	0.0618667	18.5499	15.3322	<0.04	1.99507	0.0204333	100.64		87.6012	34.2277	57.6173	8.15498							Quad (Ca-Mg-Fe)	aluminian chromian sodian	augite	57.4558	8.41346	34.1307	----------	----------	----------
				Grand mean	55.3798	0.297216	2.8167	0.625356	0.04435	4.72062	0.143586	0.0618667	18.8218	15.2726		2.06147	0.0263333	100.272		87.6654	33.8302	58.008	8.16177		yes		5.875	1303.02		Quad (Ca-Mg-Fe)	aluminian chromian sodian	augite	57.8633	8.39202	33.7447	----------	----------	----------
Kimberlite-borne Cpx Megacryst	Catoca kimberlite pipe, Angola	Cat-90	LMU Munich	Mean (n = 21)	54.4241	0.466367	3.35867	<0.07		6.00444	0.1453		16.1704	16.1009		2.83548	<0.03	99.5699		82.7603	37.1963	51.9765	10.8272		yes					Ca-Na		omphacite	----------	----------	----------	10.5742	9.54463	79.8811
			IMR CAGS	Mean (n = 5)	54.9276	0.4194	3.4554	0.0496	0.064	6.2138	0.021		15.9886	16.0462	0.1498	2.8254	0.014	100.175		82.1002	37.1939	51.564	11.2422							Quad (Ca-Mg-Fe)	aluminian sodian	augite	51.5647	11.2421	37.1932	----------	----------	----------
			IGG CAS	Mean (n = 5)	55.4158	0.46756	3.50064	0.05228	0.04922	6.03174	0.1767	0.0178	15.8272	16.1455	<0.04	2.73	0.01006	100.426		82.3863	37.6574	51.3617	10.9808							Quad (Ca-Mg-Fe)	aluminian sodian	augite	51.1957	11.2698	37.5345	----------	----------	----------
				Grand mean	54.9225	0.451109	3.43824	0.05094	0.05661	6.08333	0.161	0.0178	15.9954	16.0976		2.79696	0.01203	100.083		82.4161	37.3484	51.635	11.0166		yes		4.8382	1119.53		Quad (Ca-Mg-Fe)	aluminian sodian	augite	51.4837	11.2785	37.2378	----------	----------	----------
Kimberlite-borne Cpx Megacryst	Catoca kimberlite pipe, Angola	Cat-91	LMU Munich	Mean (n = 21)	54.3962	0.4933	3.39709	0.0987333		5.73921	0.139529		16.2223	16.2887		2.83626	<0.03	99.628		83.4396	37.5842	52.0795	10.3363		yes					Ca-Na		omphacite	----------	----------	----------	10.3507	9.77472	79.8746
			IMR CAGS	Mean (n = 5)	54.8856	0.5212	3.5108	0.0966	0.0528	5.9858	<0.01		16.1356	16.138	0.0348	2.8428	0.011	100.227		82.7739	37.3043	51.8956	10.8							Quad (Ca-Mg-Fe)	aluminian sodian	augite	51.8964	10.8	37.3036	----------	----------	----------
			IGG CAS	Mean (n = 5)	55.464	0.5052	3.5911	0.09628	0.04762	5.85286	0.19222	0.02378	15.8167	16.2636	<0.04	2.78206	0.00982	100.645		82.8094	37.9649	51.3709	10.6642							Quad (Ca-Mg-Fe)	aluminian sodian	augite	51.1901	10.9799	37.83	----------	----------	----------
				Grand mean	54.9153	0.506567	3.49966	0.0972044	0.05021	5.85929	0.165874	0.02378	16.0582	16.2301		2.82037	0.01041	100.237		83.0086	37.6166	51.7836	10.5998		yes		4.7835	1109.78		Quad (Ca-Mg-Fe)	aluminian sodian	augite	51.6274	10.8706	37.502	----------	----------	----------
Cpx in Xenolith of Ap-Phl-Cpx Rock	Catoca kimberlite pipe, Angola	Cat-98	LMU Munich	Mean (n = 21)	54.5382	0.171662	1.33406	2.62183		2.07564	<0.08		15.8149	21.1631		2.26245	<0.03	100.048		93.1422	47.2524	49.1302	3.61735		no					Quad (Ca-Mg-Fe)	chromian sodian	diopside	49.1198	3.63943	47.2408	----------	----------	----------
			IMR CAGS	Mean (n = 5)	54.978	0.176	1.2162	2.5298	0.0742	2.2228	<0.01		15.678	21.2336	0.0458	2.1172	<0.01	100.283		92.6323	47.4153	48.7104	3.87427							Quad (Ca-Mg-Fe)	chromian sodian	diopside	48.7112	3.87424	47.4145	----------	----------	----------
			IGG CAS	Mean (n = 4)	55.5698	0.180975	1.269	2.509	0.049375	2.1327	<0.06	0.03425	15.4849	21.3918	<0.04	2.06238	<0.01	100.637		92.8277	47.9622	48.3055	3.73229							Quad (Ca-Mg-Fe)	chromian sodian	diopside	48.3063	3.73226	47.9614	----------	----------	----------
				Grand mean	55.0286	0.176212	1.27309	2.55354	0.0617875	2.14371		0.03425	15.6593	21.2629		2.14734		100.341		92.8679	47.5427	48.716	3.74131				1.7252	556.507		Quad (Ca-Mg-Fe)	chromian sodian	diopside	48.7168	3.74128	47.542	----------	----------	----------
Kimberlite-borne Cpx Megacryst	Catoca kimberlite pipe, Angola	Cat-100	LMU Munich	Mean (n = 21)	54.6355	0.312824	4.03438	0.562067		4.58628	0.122262		17.3815	15.5105		2.7811	0.0280286	99.9543		87.1062	35.8425	55.8852	8.27234		yes					Quad (Ca-Mg-Fe)	aluminian chromian sodian	augite	55.7614	8.47668	35.7619	----------	----------	----------
			IMR CAGS	Mean (n = 5)	54.8766	0.3052	4.0826	0.5168	0.0196	4.686	<0.01		17.0396	15.3758	0.0762	2.7882	0.0272	99.8032		86.6343	35.974	55.4685	8.55751							Quad (Ca-Mg-Fe)	aluminian chromian sodian	augite	55.4693	8.55742	35.9733	----------	----------	----------
			IGG CAS	Mean (n = 5)	55.2595	0.29866	4.14956	0.53818	0.03234	4.67532	0.13818	0.06284	16.8867	15.4681	<0.04	2.67188	0.01936	100.201		86.5562	36.2993	55.1369	8.56381							Quad (Ca-Mg-Fe)	aluminian chromian sodian	augite	54.9967	8.79752	36.2058	----------	----------	----------
				Grand mean	54.9238	0.305561	4.08885	0.539016	0.02597	4.6492	0.130221	0.06284	17.1026	15.4514		2.74706	0.0248629	100.051		86.7678	36.0375	55.4988	8.46366		yes		5.3054	1202.55		Quad (Ca-Mg-Fe)	aluminian chromian sodian	augite	55.3667	8.68282	35.9505	----------	----------	----------
Cpx in Mantle Peridotite Xenolith&	Longgang basalts, China&	06JY31-CPX	Tang et al.11		53.6	0.29	4.38	1.22		2.83	0.09	0.05	16.2	20.5		1.17	0.01	100.4		91.0746	45.3051	49.8132	4.88173		no					Quad (Ca-Mg-Fe)	aluminian chromian	diopside	49.7358	5.03102	45.2332	----------	----------	----------
			IMR CAGS	Mean (n = 5)	52.564	0.2848	4.6882	1.0804	0.065	3.124	0.0156		16.744	20.4172	<0.02	1.0258	<0.01	100.017		90.525	44.2387	50.478	5.28337							Quad (Ca-Mg-Fe)	aluminian chromian	augite	50.4788	5.28333	44.2379	----------	----------	----------
			IGG CAS	Mean (n = 4)	53.2118	0.2979	4.75652	1.0945	0.03395	2.95002	0.061025	0.0559	16.4122	20.3235	<0.04	1.11153	<0.01	100.31		90.84	44.7051	50.2299	5.06499							Quad (Ca-Mg-Fe)	aluminian chromian	augite	50.1775	5.16559	44.6569	----------	----------	----------
				Grand mean	53.1253	0.2909	4.60824	1.13163	0.049475	2.96801	0.0755125	0.05295	16.4521	20.4136		1.10244		100.27		90.8096	44.7462	50.1758	5.07804							Quad (Ca-Mg-Fe)	aluminian chromian	augite	50.111	5.20205	44.6869	----------	----------	----------
* LMU Munich: Ludwig-Maximilians-Universität München.
** IMR CAGS: Institute of Geology, Chinese Academy of Geological Sciences.
*** IGG CAS: Institute of Geology and Geophysics, Chinese Academy of Sciences.
# The values of ZnO and MnO obtained in the IMR CAGS EPMA lab are systematically relatively high and low, respectively, and thus might be erroneous. Hence, they were excluded from calculations of grand mean values.
& Data from Tang et al.32
Mg# = Mg-number = mol% Mg/(Mg + Fe)
Wo = mol% Ca/(Mg + Fe + Ca)
En = mol% Mg/(Mg + Fe + Ca)
Fs = mol% Fe/(Mg + Fe + Ca)
Refernces (not presented in the main text):
G. T. R. Droop, A general equation for estimating Fe3+ concentrations in ferromagnesian silicates and oxides from microprobe analyses, using stoichiometric criteria. Mineralogical Magazine, 1987, 51, 431-435.

## Sheet: Table S4 SIMS O HA
Supplementary Table S4
SIMS oxygen isotope data (homogeneity assessment) for Cat–87 clinopyroxene and NIST SRM 610 glass
Epoxy mount ID	Analysis ID	Date	Primary intensity, nA	Intensity O16	O18/O16	measured δ18O, ‰	DTCA_X-corrected δ18O, ‰	IMF	final δ18Oa, ‰	± 2SE (internal error)	X position, μm	Y position, μm	DTFA_X	DTFA_Y	DTCA_X				± 1SD (over all)	± 2SD (over all)	n (over all)	Statistics for Cat–87 (Session #1 and Session #2, n = 128)
Session #1: 18 measurements within fragments 1-9 (2 spots per fragment)																± 1SD	± 2SD	n	0.138642	0.277285	128	Skewness	-0.130867	Kurtosis	0.0389721
A6573	CAT-87/1@1	2023-05-08 13:43:00	1.2367	2014537000	0.00202053	7.64462		2.33965	5.30497	0.148075	5900	3474	30	0	5	0.191028	0.382056	18				Std. error of Skewness	0.216506	Std. error of Kurtosis	0.433013
A6573	CAT-87/1@02	2023-05-08 13:46:00	1.23654	2000525000	0.00202038	7.56882		2.33965	5.22917	0.190993	5016	3509	33	2	8							Z-score of Skewness	-0.604447	Z-score of Kurtosis	0.0900022
A6573	CAT-87/1@03	2023-05-08 13:48:00	1.23709	1997501000	0.00202104	7.89797		2.33965	5.55832	0.145048	1761	3548	29	8	8
A6573	CAT-87/1@04	2023-05-08 13:51:00	1.23818	1999442000	0.00202095	7.85258		2.33965	5.51293	0.100153	1615	2960	30	0	8
A6573	CAT-87/1@05	2023-05-08 13:56:00	1.23435	1992894000	0.00202092	7.83862		2.33965	5.49897	0.143105	-651	3539	32	2	8
A6573	CAT-87/1@06	2023-05-08 13:58:00	1.22919	1981207000	0.00202141	8.08249		2.33965	5.74284	0.141387	-952	3458	30	2	11
A6573	CAT-87/1@07	2023-05-08 14:00:00	1.23482	2013368000	0.00202057	7.66357		2.33965	5.32392	0.141534	-1767	3734	27	4	8
A6573	CAT-87/1@08	2023-05-08 14:03:00	1.23388	1990725000	0.00202127	8.01616		2.33965	5.67651	0.129718	-2376	3795	27	6	10
A6573	CAT-87/1@09	2023-05-08 14:08:00	1.23357	2007828000	0.00202122	7.98873		2.33965	5.64908	0.116633	-3404	3324	28	1	9
A6573	CAT-87/1@10	2023-05-08 14:10:00	1.23036	1984108000	0.00202119	7.97377		2.33965	5.63412	0.181692	-3579	3170	30	-1	12
A6573	CAT-87/1@11	2023-05-08 14:12:00	1.23263	1977182000	0.00202177	8.26351		2.33965	5.92386	0.139532	-3056	5743	28	27	8
A6573	CAT-87/1@12	2023-05-08 14:15:00	1.23263	2006722000	0.002021	7.88001		2.33965	5.54036	0.179487	-2484	5806	22	29	6
A6573	CAT-87/1@13	2023-05-08 14:20:00	1.2331	1986596000	0.00202083	7.79473		2.33965	5.45508	0.157613	-1393	4810	30	15	11
A6573	CAT-87/1@14	2023-05-08 14:22:00	1.23811	1995310000	0.00202118	7.96778		2.33965	5.62813	0.155646	-323	4708	29	15	9
A6573	CAT-87/1@15	2023-05-08 14:24:00	1.23584	1990940000	0.00202104	7.89846		2.33965	5.55881	0.221839	2776	4669	33	14	8
A6573	CAT-87/1@16	2023-05-08 14:29:00	1.23177	1977704000	0.002021	7.88051		2.33965	5.54086	0.13794	2877	5325	35	26	10
A6573	CAT-87/1@17	2023-05-08 14:31:00	1.23154	1963646000	0.00202119	7.97277		2.33965	5.63312	0.152742	4275	4758	39	15	11
A6573	CAT-87/1@18	2023-05-08 14:34:00	1.23717	1993118000	0.00202018	7.46858		2.33965	5.12893	0.136434	5082	4807	35	15	6
Session #2: 110 measurements within fragments 10-59 (1 to 4 spots per fragment)																± 1SD	± 2SD	n
A6585	CAT-87/2@1	2023-05-12 14:38:00	1.25649	2083472000	0.00201793	6.347	6.59045	1.03151	5.55893	0.109777	1616	-1748	-26	-13	2	0.181052	0.362103	110	before DTCA_X correction
A6585	CAT-87/2@002	2023-05-12 14:41:00	1.25461	2065305000	0.00201797	6.36894	6.53269	1.03151	5.50118	0.144402	1504	-1737	-26	-13	3	0.129246	0.258492	110	after DTCA_X correction
A6585	CAT-87/2@003	2023-05-12 14:43:00	1.2554	2069643000	0.00201769	6.22881	6.39255	1.03151	5.36104	0.120225	1257	-1772	-27	-13	3
A6585	CAT-87/2@004	2023-05-12 14:45:00	1.25242	2061568000	0.00201827	6.51755	6.6016	1.03151	5.57009	0.135502	1126	-1762	-27	-10	4
A6585	CAT-87/2@005	2023-05-12 14:50:00	1.25282	2058479000	0.0020181	6.43277	6.43712	1.03151	5.40561	0.125444	792	-1840	-27	-14	5
A6585	CAT-87/2@006	2023-05-12 14:53:00	1.25109	2065346000	0.00201849	6.62727	6.71132	1.03151	5.6798	0.125094	489	-1842	-28	-11	4
A6585	CAT-87/2@007	2023-05-12 14:55:00	1.25117	2054633000	0.0020182	6.48364	6.48799	1.03151	5.45648	0.152665	432	-1818	-28	-14	5
A6585	CAT-87/2@008	2023-05-12 14:57:00	1.25266	2074291000	0.0020181	6.43427	6.59802	1.03151	5.56651	0.148669	236	-2085	-24	-18	3
A6585	CAT-87/2@009	2023-05-12 15:02:00	1.26252	2069821000	0.00201791	6.34101	6.42506	1.03151	5.39355	0.103685	108	-1904	-28	-15	4
A6585	CAT-87/2@010	2023-05-12 15:04:00	1.24867	2098495000	0.00201781	6.28616	6.3702	1.03151	5.33869	0.169587	12	-1915	-28	-15	4
A6585	CAT-87/2@011	2023-05-12 15:07:00	1.26713	2093391000	0.002018	6.3839	6.46795	1.03151	5.43644	0.151415	-216	-1956	-28	-15	4
A6585	CAT-87/2@012	2023-05-12 15:09:00	1.26353	2078302000	0.00201865	6.70956	6.7139	1.03151	5.68239	0.155575	-346	-1933	-28	-14	5
A6585	CAT-87/2@013	2023-05-12 15:14:00	1.25978	2083108000	0.00201899	6.87712	6.80177	1.03151	5.77025	0.0979003	-523	-2125	-29	-14	6
A6585	CAT-87/2@014	2023-05-12 15:16:00	1.26009	2086164000	0.00201832	6.54448	6.54883	1.03151	5.51732	0.11604	-678	-1967	-28	-15	5
A6585	CAT-87/2@015	2023-05-12 15:19:00	1.26181	2077986000	0.002018	6.3844	6.38875	1.03151	5.35724	0.148536	-811	-1953	-28	-15	5
A6585	CAT-87/2@016	2023-05-12 15:21:00	1.26478	2109541000	0.00201865	6.71005	6.6347	1.03151	5.60319	0.125722	-1086	-2194	-30	-17	6
A6585	CAT-87/2@017	2023-05-12 15:26:00	1.2683	2112643000	0.00201825	6.50608	6.51043	1.03151	5.47892	0.109694	-1158	-2206	-30	-17	5
A6585	CAT-87/2@018	2023-05-12 15:28:00	1.26956	2094613000	0.00201876	6.76292	6.76726	1.03151	5.73575	0.141745	-1419	-2230	-26	-17	5
A6585	CAT-87/2@019	2023-05-12 15:30:00	1.27018	2072404000	0.00201856	6.66068	6.50563	1.03151	5.47412	0.11594	-1732	-1692	-26	-14	7
A6585	CAT-87/2@020	2023-05-12 15:33:00	1.27331	2103160000	0.00201841	6.58937	6.51401	1.03151	5.4825	0.10994	-1643	-1664	-30	-13	6
A6585	CAT-87/2@021	2023-05-12 15:38:00	1.27135	2066348000	0.00201898	6.87263	6.47848	1.03151	5.44697	0.126395	-1796	-1467	-29	-11	10
A6585	CAT-87/2@022	2023-05-12 15:40:00	1.27433	2082447000	0.00201872	6.74247	6.58742	1.03151	5.5559	0.132038	-1722	-1421	-29	-10	7
A6585	CAT-87/2@023	2023-05-12 15:42:00	1.27417	2089124000	0.0020187	6.73449	6.57944	1.03151	5.54792	0.123269	-1445	-1407	-29	-11	7
A6585	CAT-87/2@024	2023-05-12 15:45:00	1.27566	2103174000	0.00201854	6.6537	6.57835	1.03151	5.54683	0.0913282	-1324	-1623	-30	-14	6
A6585	CAT-87/2@025	2023-05-12 15:49:00	1.27065	2091001000	0.00201876	6.76292	6.68756	1.03151	5.65605	0.174281	-1220	-1392	-29	-11	6
A6585	CAT-87/2@026	2023-05-12 15:52:00	1.26807	2091597000	0.00201898	6.87213	6.79678	1.03151	5.76527	0.205817	-1148	-1338	-29	-11	6
A6585	CAT-87/2@027	2023-05-12 15:54:00	1.27112	2083221000	0.00201866	6.71404	6.63869	1.03151	5.60718	0.144041	-825	-1359	-29	-11	6
A6585	CAT-87/2@028	2023-05-12 15:57:00	1.2676	2084972000	0.00201891	6.83922	6.84357	1.03151	5.81205	0.119213	-714	-1338	-29	-9	5
A6585	CAT-87/2@029	2023-05-12 16:01:00	1.26494	2086847000	0.00201825	6.50858	6.59262	1.03151	5.56111	0.12945	-479	-1552	-29	-13	4
A6585	CAT-87/2@030	2023-05-12 16:04:00	1.25915	2070646000	0.00201825	6.50808	6.43273	1.03151	5.40121	0.108659	-276	-1536	-28	-13	6
A6585	CAT-87/2@031	2023-05-12 16:06:00	1.25813	2079881000	0.00201795	6.35797	6.28262	1.03151	5.2511	0.14825	-139	-1487	-28	-13	6
A6585	CAT-87/2@032	2023-05-12 16:08:00	1.25344	2065530000	0.00201827	6.51706	6.4417	1.03151	5.41019	0.182208	-67	-1242	-28	-11	6
A6585	CAT-87/2@033	2023-05-12 16:13:00	1.25313	2063443000	0.00201887	6.81827	6.82262	1.03151	5.79111	0.132576	9	-1218	-28	-11	5
A6585	CAT-87/2@034	2023-05-12 16:16:00	1.25101	2066676000	0.00201832	6.54299	6.46764	1.03151	5.43612	0.105215	225	-1474	-26	-13	6
A6585	CAT-87/2@035	2023-05-12 16:18:00	1.25094	2044890000	0.00201862	6.6931	6.61775	1.03151	5.58623	0.129634	264	-1196	-27	-11	6
A6585	CAT-87/2@036	2023-05-12 16:20:00	1.25008	2052080000	0.00201845	6.60782	6.53247	1.03151	5.50095	0.121025	373	-1198	-26	-11	6
A6585	CAT-87/2@037	2023-05-12 16:25:00	1.25884	2051966000	0.00201813	6.44774	6.45208	1.03151	5.42057	0.146453	502	-1430	-25	-12	5
A6585	CAT-87/2@038	2023-05-12 16:27:00	1.24351	2061283000	0.00201804	6.40335	6.328	1.03151	5.29649	0.122421	619	-1433	-27	-13	6
A6585	CAT-87/2@039	2023-05-12 16:30:00	1.24616	2047932000	0.00201812	6.44225	6.5263	1.03151	5.49478	0.11894	1007	-1360	-27	-11	4
A6585	CAT-87/2@040	2023-05-12 16:32:00	1.24397	2072424000	0.00201766	6.21434	6.37809	1.03151	5.34658	0.0968203	1127	-1394	-28	-13	3
A6585	CAT-87/2@041	2023-05-12 16:37:00	1.24523	2062389000	0.00201832	6.54099	6.70474	1.03151	5.67323	0.134536	1444	-1359	-28	-10	3
A6585	CAT-87/2@042	2023-05-12 16:39:00	1.24405	2055107000	0.00201784	6.30211	6.54556	1.03151	5.51405	0.106635	1544	-1068	-27	-10	2
A6585	CAT-87/2@043	2023-05-12 16:42:00	1.24257	2035041000	0.00201828	6.52404	6.68778	1.03151	5.65627	0.138017	1293	-1119	-28	-5	3
A6585	CAT-87/2@044	2023-05-12 16:44:00	1.24124	2036606000	0.00201828	6.52553	6.60958	1.03151	5.57807	0.119083	1228	-1190	-27	-8	4
A6585	CAT-87/2@045	2023-05-12 16:49:00	1.24257	2047106000	0.00201813	6.44823	6.53228	1.03151	5.50077	0.118585	673	-1172	-28	-8	4
A6585	CAT-87/2@046	2023-05-12 16:51:00	1.24257	2065375000	0.00201766	6.21434	6.45779	1.03151	5.42628	0.138363	1082	-730	-29	-9	2
A6585	CAT-87/2@047	2023-05-12 16:53:00	1.23944	2060667000	0.00201778	6.27219	6.43594	1.03151	5.40443	0.167226	1070	-494	-29	-8	3
A6585	CAT-87/2@048	2023-05-12 16:56:00	1.24084	2038980000	0.00201763	6.19739	6.28143	1.03151	5.24992	0.119631	948	-499	-29	-7	4
A6585	CAT-87/2@049	2023-05-12 17:00:00	1.24883	2052901000	0.00201804	6.40186	6.4859	1.03151	5.45439	0.1288	732	-810	-28	-9	4
A6585	CAT-87/2@050	2023-05-12 17:03:00	1.24186	2043670000	0.0020184	6.58488	6.66893	1.03151	5.63741	0.131397	646	-819	-28	-9	4
A6585	CAT-87/2@051	2023-05-12 17:05:00	1.23686	2020244000	0.00201832	6.54498	6.62903	1.03151	5.59752	0.131445	567	-546	-24	-7	4
A6585	CAT-87/2@052	2023-05-12 17:08:00	1.23646	2030024000	0.00201853	6.64821	6.65256	1.03151	5.62105	0.140218	261	-562	-28	-7	5
A6585	CAT-87/2@053	2023-05-12 17:12:00	1.23654	2054959000	0.00201801	6.38989	6.47393	1.03151	5.44242	0.133585	277	-826	-29	-10	4
A6585	CAT-87/2@054	2023-05-12 17:15:00	1.23803	2037336000	0.002018	6.3839	6.38825	1.03151	5.35674	0.128106	140	-840	-28	-10	5
A6585	CAT-87/2@055	2023-05-12 17:17:00	1.23584	2037152000	0.00201858	6.67415	6.59879	1.03151	5.56728	0.154819	-387	-646	-29	-8	6
A6585	CAT-87/2@056	2023-05-12 17:19:00	1.23897	2045255000	0.00201821	6.48614	6.49048	1.03151	5.45897	0.0992359	-585	-876	-29	-9	5
A6585	CAT-87/2@057	2023-05-12 17:24:00	1.23592	2036715000	0.00201872	6.74446	6.74881	1.03151	5.7173	0.117035	-676	-882	-29	-9	5
A6585	CAT-87/2@058	2023-05-12 17:26:00	1.23357	2032239000	0.00201885	6.8078	6.73245	1.03151	5.70093	0.120333	-772	-666	-29	-8	6
A6585	CAT-87/2@059	2023-05-12 17:29:00	1.23733	2036079000	0.00201848	6.62478	6.54942	1.03151	5.51791	0.127607	-1039	-938	-30	-9	6
A6585	CAT-87/2@060	2023-05-12 17:31:00	1.23772	2036250000	0.00201859	6.67913	6.68348	1.03151	5.65197	0.138478	-1038	-715	-30	-7	5
A6585	CAT-87/2@061	2023-05-12 17:36:00	1.23287	2027203000	0.00201859	6.67614	6.60079	1.03151	5.56928	0.143125	-1163	-724	-30	-7	6
A6585	CAT-87/2@062	2023-05-12 17:38:00	1.23271	2031343000	0.00201882	6.79433	6.79868	1.03151	5.76717	0.133295	-1304	-1028	-29	-10	5
A6585	CAT-87/2@063	2023-05-12 17:41:00	1.23349	2029119000	0.00201863	6.69958	6.54453	1.03151	5.51302	0.184034	-1409	-1069	-29	-10	7
A6585	CAT-87/2@064	2023-05-12 17:43:00	1.23467	2041584000	0.00201859	6.67614	6.68049	1.03151	5.64898	0.160507	-1351	-808	-30	-8	5
A6585	CAT-87/2@065	2023-05-12 17:48:00	1.2331	2020562000	0.00201865	6.70656	6.63121	1.03151	5.5997	0.124878	-1436	-776	-29	-8	6
A6585	CAT-87/2@066	2023-05-12 17:50:00	1.23302	2029175000	0.00201846	6.6143	6.37955	1.03151	5.34804	0.116513	-1666	-1026	-29	-10	8
A6585	CAT-87/2@067	2023-05-12 17:52:00	1.23161	2020995000	0.00201925	7.00678	6.77203	1.03151	5.74052	0.154663	-1693	-810	-29	-8	8
A6585	CAT-87/2@068	2023-05-12 17:55:00	1.23983	2071029000	0.00201818	6.47217	6.63592	1.03151	5.60441	0.136585	1230	-1983	-27	-18	3
A6585	CAT-87/2@069	2023-05-12 18:00:00	1.23912	2068654000	0.00201793	6.347	6.51075	1.03151	5.47923	0.130989	889	-2003	-27	-18	3
A6585	CAT-87/2@070	2023-05-12 18:02:00	1.23818	2055079000	0.00201824	6.50259	6.50694	1.03151	5.47543	0.166707	732	-2028	-28	-19	5
A6585	CAT-87/2@071	2023-05-12 18:04:00	1.23599	2061651000	0.00201813	6.44774	6.45208	1.03151	5.42057	0.127593	497	-2066	-27	-19	5
A6585	CAT-87/2@072	2023-05-12 18:07:00	1.24006	2053075000	0.00201829	6.53052	6.69427	1.03151	5.66276	0.137211	290	-2067	-24	-19	3
A6585	CAT-87/2@073	2023-05-12 18:11:00	1.2342	2053882000	0.00201799	6.37842	6.30306	1.03151	5.27155	0.141561	-577	-2144	-29	-18	6
A6585	CAT-87/2@074	2023-05-12 18:14:00	1.2356	2056171000	0.00201798	6.37293	6.37728	1.03151	5.34576	0.148736	-821	-2175	-29	-18	5
A6585	CAT-87/2@075	2023-05-12 18:16:00	1.23146	2045121000	0.00201812	6.44275	6.4471	1.03151	5.41558	0.151825	-1646	-2093	-30	-15	5
A6585	CAT-87/2@076	2023-05-12 18:19:00	1.23177	2024823000	0.00201919	6.97586	6.66141	1.03151	5.6299	0.118875	-1782	-2129	-29	-16	9
A6585	CAT-87/2@077	2023-05-12 18:23:00	1.23193	2030210000	0.00201886	6.81229	6.73694	1.03151	5.70542	0.118131	-1648	-2267	-27	-17	6
A6585	CAT-87/2@078	2023-05-12 18:26:00	1.23279	2038580000	0.00201849	6.62627	6.63062	1.03151	5.59911	0.126312	-623	-1927	-28	-15	5
A6585	CAT-87/2@079	2023-05-12 18:28:00	1.23373	2013889000	0.00201877	6.7699	6.53515	1.03151	5.50363	0.124931	-1798	-1684	-29	-13	8
A6585	CAT-87/2@080	2023-05-12 18:30:00	1.23028	2069727000	0.00201795	6.35897	6.52271	1.03151	5.4912	0.158846	-5	-1450	-27	-12	3
A6585	CAT-87/2@081	2023-05-12 18:35:00	1.23115	2026918000	0.00201855	6.6557	6.73974	1.03151	5.70823	0.141299	1211	-1106	-27	-9	4
A6585	CAT-87/2@082	2023-05-12 18:38:00	1.23584	2049479000	0.00201769	6.22831	6.47175	1.03151	5.44024	0.125466	1378	-1388	-27	-12	2
A6585	CAT-87/2@083	2023-05-12 18:40:00	1.23138	2034815000	0.00201798	6.37542	6.53917	1.03151	5.50766	0.118277	1003	-489	-29	-7	3
A6585	CAT-87/2@084	2023-05-12 18:42:00	1.23334	2035263000	0.00201829	6.53052	6.61457	1.03151	5.58306	0.145658	205	-816	-29	-10	4
A6585	CAT-87/2@085	2023-05-12 18:47:00	1.23459	2022984000	0.00201847	6.61779	6.62214	1.03151	5.59063	0.156703	27	-620	-28	-8	5
A6585	CAT-87/2@086	2023-05-12 18:49:00	1.23451	2021937000	0.00201856	6.66068	6.66503	1.03151	5.63352	0.145289	-720	-648	-29	-8	5
A6585	CAT-87/2@087	2023-05-12 18:52:00	1.23404	2029293000	0.00201831	6.5385	6.62255	1.03151	5.59103	0.145714	-831	-673	-30	-8	4
A6585	CAT-87/2@088	2023-05-12 18:54:00	1.24335	2034240000	0.00201805	6.40983	6.41418	1.03151	5.38267	0.151363	-948	-936	-30	-9	5
A6585	CAT-87/2@089	2023-05-12 18:59:00	1.22825	2018183000	0.00201907	6.91851	6.76346	1.03151	5.73195	0.149107	-1401	-1009	-29	-9	7
A6585	CAT-87/2@090	2023-05-12 19:01:00	1.22982	2022530000	0.00201863	6.69858	6.54353	1.03151	5.51202	0.11975	-1633	-811	-29	-8	7
A6585	CAT-87/2@091	2023-05-12 19:04:00	1.22934	2019796000	0.00201849	6.62577	6.47072	1.03151	5.43921	0.109546	-1104	-709	-30	-8	7
A6585	CAT-87/2@092	2023-05-12 19:06:00	1.22997	2030324000	0.00201878	6.7704	6.61534	1.03151	5.58383	0.136454	-1501	-1382	-29	-11	7
A6585	CAT-87/2@093	2023-05-12 19:11:00	1.2313	2035351000	0.00201817	6.46918	6.39383	1.03151	5.36231	0.117935	-1314	-1562	-29	-13	6
A6585	CAT-87/2@094	2023-05-12 19:13:00	1.23404	2036738000	0.00201809	6.42928	6.27423	1.03151	5.24272	0.138052	-1382	-1616	-30	-14	7
A6585	CAT-87/2@095	2023-05-12 19:16:00	1.23294	2027960000	0.00201867	6.71903	6.64368	1.03151	5.61216	0.126679	-298	-1910	-27	-15	6
A6585	CAT-87/2@096	2023-05-12 19:18:00	1.23334	2043724000	0.00201839	6.5759	6.65995	1.03151	5.62844	0.182972	55	-1873	-29	-16	4
A6585	CAT-87/2@097	2023-05-12 19:23:00	1.2342	2044046000	0.0020181	6.43128	6.59503	1.03151	5.56351	0.132031	1195	-1760	-27	-15	3
A6585	CAT-87/2@098	2023-05-12 19:25:00	1.23552	2039636000	0.00201816	6.46419	6.54824	1.03151	5.51673	0.114534	1063	-1757	-27	-15	4
A6585	CAT-87/2@099	2023-05-12 19:27:00	1.23287	2042572000	0.00201786	6.31159	6.55504	1.03151	5.52352	0.134586	1553	-1758	-23	-15	2
A6585	CAT-87/2@100	2023-05-12 19:30:00	1.23506	2049674000	0.0020178	6.28117	6.44492	1.03151	5.4134	0.111258	1145	-1943	-27	-17	3
A6585	CAT-87/2@101	2023-05-12 19:35:00	1.24084	2042590000	0.00201821	6.48863	6.49298	1.03151	5.46146	0.136988	675	-1398	-27	-13	5
A6585	CAT-87/2@102	2023-05-12 19:37:00	1.22833	2032097000	0.00201843	6.59984	6.68389	1.03151	5.65237	0.16641	948	-1106	-28	-10	4
A6585	CAT-87/2@103	2023-05-12 19:39:00	1.23177	2046175000	0.00201823	6.5001	6.58415	1.03151	5.55263	0.125762	734	-1186	-27	-11	4
A6585	CAT-87/2@104	2023-05-12 19:42:00	1.23067	2035306000	0.00201854	6.6542	6.49915	1.03151	5.46763	0.129265	-1390	-1394	-29	-11	7
A6585	CAT-87/2@105	2023-05-12 19:44:00	1.22942	2031878000	0.0020186	6.68013	6.60478	1.03151	5.57327	0.132208	-1608	-1033	-29	-10	6
A6585	CAT-87/2@106	2023-05-12 19:49:00	1.22856	2007456000	0.00201869	6.72751	6.41306	1.03151	5.38154	0.130003	-1723	-862	-29	-9	9
A6585	CAT-87/2@107	2023-05-12 19:51:00	1.22841	1989761000	0.00201879	6.77588	6.62083	1.03151	5.58932	0.125553	-1480	-745	-25	-8	7
A6585	CAT-87/2@108	2023-05-12 19:53:00	1.23122	2031200000	0.00201867	6.71903	6.72338	1.03151	5.69186	0.133292	-1089	-975	-30	-9	5
A6585	CAT-87/2@109	2023-05-12 19:56:00	1.23044	2018394000	0.00201818	6.47467	6.39931	1.03151	5.3678	0.172037	-521	-681	-29	-8	6
A6585	CAT-87/2@110	2023-05-12 19:58:00	1.22966	2024507000	0.00201879	6.77937	6.70402	1.03151	5.67251	0.143359	612	-873	-28	-10	6
a: IMF-corrected values, using the value obtained by IRMS (i.e., δ18O = 5.53‰).
Data for NIST610 glass reference material
Epoxy mount ID	Analysis ID	Date	Primary intensiy, nA	Intensity O16	O18/O16	measured δ18O, ‰				± 2SE (internal error)	X position, μm	Y position, μm	DTFA_X	DTFA_Y	DTCA_X
Session #1																Mean	± 1SD	± 2SD	n
A6573	610/1@1	2023-05-08 13:39:00	1.23623	1986904000	0.00202518	9.96459				0.162093	6324	1667	35	-6	7	9.89855	0.103087	0.206174	7
A6573	610/1@2	2023-05-08 13:41:00	1.23756	1981374000	0.00202485	9.79803				0.116678	6285	1926	35	-5	7
A6573	610/1@3	2023-05-08 13:53:00	1.23631	1993518000	0.00202481	9.78007				0.178997	5448	1734	33	-6	9
A6573	610/1@4	2023-05-08 14:05:00	1.23615	1986455000	0.00202505	9.89777				0.140888	5283	1862	33	-5	7
A6573	610/1@5	2023-05-08 14:17:00	1.23255	1976217000	0.00202541	10.0768				0.121027	4008	1831	34	-4	9
A6573	610/1@6	2023-05-08 14:27:00	1.23365	1965615000	0.00202494	9.8464				0.16086	4051	2098	35	-2	9
A6573	610/1@7	2023-05-08 14:36:00	1.23404	1977358000	0.0020251	9.92619				0.150231	4188	1989	34	-3	7
Session #2																Mean	± 1SD	± 2SD	n
A6585	610/2@1	2023-05-12 14:34:00	1.25211	2043653000	0.00202328	9.01755				0.136241	-1644	-337	-27	-6	7	8.95384	0.141436	0.282871	30
A6585	610/2@2	2023-05-12 14:36:00	1.25633	2034737000	0.0020236	9.17564				0.12937	-1766	-261	-27	-5	7
A6585	610/2@3	2023-05-12 14:48:00	1.24914	2037297000	0.00202299	8.87243				0.145093	-1403	-130	-28	-6	8
A6585	610/2@4	2023-05-12 15:00:00	1.25454	2043479000	0.002023	8.87542				0.171437	-1358	-356	-28	-7	7
A6585	610/2@5	2023-05-12 15:12:00	1.2586	2062888000	0.00202297	8.86346				0.101679	-1064	-95	-28	-6	6
A6585	610/2@6	2023-05-12 15:23:00	1.26502	2077445000	0.00202322	8.98663				0.127817	-723	-63	-28	-7	6
A6585	610/2@7	2023-05-12 15:35:00	1.27378	2090502000	0.00202311	8.93128				0.156545	-415	-251	-28	-7	5
A6585	610/2@8	2023-05-12 15:47:00	1.28434	2083317000	0.00202303	8.89188				0.130144	-456	16	-28	-6	5
A6585	610/2@9	2023-05-12 15:59:00	1.26588	2055524000	0.00202337	9.06344				0.145591	-175	-88	-27	-6	6
A6585	610/2@10	2023-05-12 16:11:00	1.25368	2040635000	0.00202332	9.03451				0.137381	-140	-232	-27	-6	7
A6585	610/2@11	2023-05-12 16:23:00	1.2457	2030594000	0.00202311	8.93277				0.154384	-92	-322	-27	-7	7
A6585	610/2@12	2023-05-12 16:35:00	1.24304	2044928000	0.00202287	8.81059				0.129751	175	-254	-27	-7	5
A6585	610/2@13	2023-05-12 16:46:00	1.24069	2036473000	0.00202344	9.09435				0.130193	271	-186	-27	-7	7
A6585	610/2@14	2023-05-12 16:58:00	1.24397	2047822000	0.00202252	8.63605				0.15816	350	16	-28	-7	4
A6585	610/2@15	2023-05-12 17:10:00	1.23866	2023091000	0.00202346	9.10632				0.143954	544	44	-27	-7	5
A6585	610/2@16	2023-05-12 17:22:00	1.23568	2026177000	0.00202316	8.95472				0.166525	640	110	-27	-7	5
A6585	610/2@17	2023-05-12 17:34:00	1.24796	2033688000	0.00202299	8.87193				0.147887	601	-207	-27	-7	4
A6585	610/2@18	2023-05-12 17:45:00	1.23302	2034434000	0.00202304	8.89787				0.130025	783	-86	-27	-7	4
A6585	610/2@19	2023-05-12 17:57:00	1.23607	2030966000	0.00202335	9.04897				0.13255	818	86	-27	-7	5
A6585	610/2@20	2023-05-12 18:09:00	1.24476	2037068000	0.0020231	8.92779				0.153432	951	95	-27	-7	4
A6585	610/2@21	2023-05-12 18:21:00	1.23404	2020042000	0.00202342	9.08538				0.143412	935	188	-27	-3	4
A6585	610/2@22	2023-05-12 18:33:00	1.23232	2033097000	0.00202274	8.74626				0.142439	818	178	-28	-7	4
A6585	610/2@23	2023-05-12 18:45:00	1.23201	2023362000	0.00202374	9.24546				0.168981	548	-150	-27	-4	3
A6585	610/2@24	2023-05-12 18:57:00	1.22958	2034542000	0.00202287	8.81408				0.143803	287	86	-29	-7	4
A6585	610/2@25	2023-05-12 19:08:00	1.23208	2024256000	0.00202334	9.04498				0.116677	4	-219	-28	-8	5
A6585	610/2@26	2023-05-12 19:20:00	1.2306	2011418000	0.00202312	8.93776				0.127077	64	21	-24	-7	3
A6585	610/2@27	2023-05-12 19:32:00	1.23443	2023081000	0.00202252	8.63654				0.121484	-86	-64	-28	-7	6
A6585	610/2@28	2023-05-12 19:46:00	1.2295	2024010000	0.00202324	8.99661				0.130089	-679	-10	-29	-8	6
A6585	610/2@29	2023-05-12 20:01:00	1.22872	2010455000	0.00202337	9.06194				0.171428	-1296	-95	-29	-7	7
A6585	610/2@30	2023-05-12 20:03:00	1.23232	2018745000	0.00202335	9.05246				0.126644	0	0	-29	-7	6

## Sheet: Table S5 IRMS O
Supplementary Table S5
IRMS oxygen isotope data for Cat–87 clinopyroxene, eight other clinopyroxene samples from the Catoca kimberlite, and clinopyroxene reference materials 06JY29-CPX and 06JY31-CPX
Sample type	Host volcanic rock	Laboratory	Date	Sample ID	Analysis ID	Weight, mg	δ18O, ‰	Comments	Mean	± 1SD	± 2SD	n
Kimberlite-borne Cpx Megacryst	Catoca kimberlite pipe, Angola	IGG CAS*	May 2024	Cat–87	CAT87/1	~1.5	5.42		5.53375	0.0678101	0.13562	8
					CAT87/2	~1.5	5.51
					CAT87/3	~1.5	5.62
					CAT87/4	~1.5	5.51
					CAT87/5	~1.5	5.55
					CAT87/6	~1.5	5.63
					CAT87/7	~1.5	5.53
					CAT87/8	~1.5	5.5
Kimberlite-borne Cpx Megacryst	Catoca kimberlite pipe, Angola		December 2024	Cat-86	C-86/6-A	~1.5	5.55		5.615	0.0919239	0.183848	2
					C-86/6-B	~1.5	5.68
Kimberlite-borne Cpx Megacryst				Cat-88	C-88/8-A	~1.5	5.52		5.52	-	-	1
					C-88/8-B	~1.5	5.21	Unusual Reaction; Excluded Analysis
Kimberlite-borne Cpx Megacryst				Cat-89	C-89/4-A	~1.5	5.56		5.57	0.0141421	0.0282843	2
					C-89/4-B	~1.5	5.58
Kimberlite-borne Cpx Megacryst				Cat-90	C-90/2-A	~1.5	5.67		5.6	0.0989949	0.19799	2
					C-90/2-B	~1.5	5.53
Kimberlite-borne Cpx Megacryst				Cat-91	C-91/5-A	~1.5	5.41		5.465	0.0777817	0.155563	2
					C-91/5-B	~1.5	5.52
Kimberlite-borne Cpx Megacryst				Cat-96	C-96/3-A	~1.5	5.08	Heterogeneous Material? / Effect of Alterations?	5.205	0.176777	0.353553	2
					C-96/3-B	~1.5	5.33
Cpx in Xenolith of Ap-Phl-Cpx Rock				Cat-98	C-98/1-A	~1.5	5.5		5.49	0.0141421	0.0282843	2
					C-98/1-B	~1.5	5.48
Kimberlite-borne Cpx Megacryst				Cat-100	C-100/7-A	~1.5	5.51		5.555	0.0636396	0.127279	2
					C-100/7-B	~1.5	5.6
Cpx in Mantle Peridotite Xenolith	Longgang basalts, China**		May 2023	06JY31-CPX	31-1	~1.5	5.552		5.5185	0.0473762	0.0947523	2
					31-2	~1.5	5.485
Cpx in Mantle Peridotite Xenolith	Longgang basalts, China (?)			06JY29-CPX	29-1	~1.5	5.904	Poorer Homogeneity?	5.756	0.209304	0.418607	2
					29-2	~1.5	5.608
* IGG CAS: Institute of Geology and Geophysics, Chinese Academy of Sciences.
** Data from Tang et al.32

## Sheet: Table S6 SIMS O Cpx
Supplementary Table S6
SIMS oxygen isotope data for seven clinopyroxene samples from the Catoca kimberlite and clinopyroxene reference material 06JY31-CPX, corrected for IMF using Cat–87 clinopyroxene
Epoxy mount ID	Analysis ID	Date	Primary intensity, nA	Intensity O16	O18/O16	measured δ18O, ‰	drift-corrected δ18O, ‰a	IMF	δ18O*, ‰b	± 2SE (internal error)	X position, μm	Y position, μm
Session #3A (Part 1): IMF was corrected using Cat–87_line_01 clinopyroxene (see maint text for details)
Cat-86: 20 measurements within 19 fragments													Mean δ18O*, ‰	± 1SD	± 2SD	n	IRMS δ18O, ‰	residual bias (rel. Cat–87), ‰
A7021	Cat-86@1	2024-11-20 14:00:00	0.968913	1540050000	0.00202451	9.63096	9.7669	4.34642	5.42047	0.188043	4383	-3518	5.60792	0.129087	0.258174	20	5.62	-0.0120818
A7021	Cat-86@02	2024-11-20 14:03:00	0.96328	1523579000	0.00202488	9.81598	9.94951	4.34642	5.60309	0.135452	4097	-3546
A7021	Cat-86@03	2024-11-20 14:06:00	0.95976	1520151000	0.00202474	9.74516	9.8763	4.34642	5.52988	0.138332	3734	-3554
A7021	Cat-86@04	2024-11-20 14:10:00	0.961324	1507280000	0.00202503	9.88829	10.017	4.34642	5.67061	0.155918	2935	-3563
A7021	Cat-86@05	2024-11-20 14:17:00	0.952171	1512133000	0.00202492	9.83393	9.95787	4.34642	5.61145	0.138443	2517	-3593
A7021	Cat-86@06	2024-11-20 14:20:00	0.951233	1511995000	0.00202458	9.66387	9.78541	4.34642	5.43899	0.179481	2056	-3542
A7021	Cat-86@07	2024-11-20 14:23:00	0.948495	1495341000	0.00202508	9.91522	10.0344	4.34642	5.68794	0.154038	1787	-3559
A7021	Cat-86@08	2024-11-20 14:26:00	0.948416	1507826000	0.00202464	9.69429	9.81103	4.34642	5.46461	0.216502	1102	-3588
A7021	Cat-86@09	2024-11-20 14:33:00	0.945835	1501617000	0.00202491	9.82944	9.94138	4.34642	5.59496	0.136548	730	-3583
A7021	Cat-86@10	2024-11-20 14:36:00	0.942158	1499533000	0.0020248	9.77309	9.88263	4.34642	5.5362	0.136482	248	-3569
A7021	Cat-86@11	2024-11-20 14:40:00	0.943175	1506896000	0.00202485	9.80102	9.90815	4.34642	5.56173	0.118442	-179	-3649
A7021	Cat-86@12	2024-11-20 14:43:00	0.941063	1507295000	0.00202473	9.74018	9.84491	4.34642	5.49849	0.144655	-519	-3606
A7021	Cat-86@13	2024-11-20 14:50:00	0.940046	1493833000	0.00202527	10.007	10.1069	4.34642	5.7605	0.135508	-957	-3635
A7021	Cat-86@14	2024-11-20 14:53:00	0.938794	1483623000	0.00202517	9.95961	10.0571	4.34642	5.71072	0.151578	-1360	-3611
A7021	Cat-86@15	2024-11-20 15:00:00	0.938011	1495483000	0.00202494	9.8454	9.93814	4.34642	5.59172	0.0923325	-1830	-3556
A7021	Cat-86@16	2024-11-20 15:03:00	0.937386	1494041000	0.00202526	10.0055	10.0958	4.34642	5.7494	0.146257	-2268	-3596
A7021	Cat-86@17	2024-11-20 15:10:00	0.936369	1488894000	0.00202489	9.81947	9.90501	4.34642	5.55858	0.162385	-2816	-3586
A7021	Cat-86@18	2024-11-20 15:13:00	0.935352	1488493000	0.00202566	10.2035	10.2866	4.34642	5.94019	0.10771	-3492	-3618
A7021	Cat-86@19	2024-11-20 15:17:00	0.936056	1496361000	0.00202526	10.0015	10.0822	4.34642	5.73581	0.171733	-3934	-3648
A7021	Cat-86@20	2024-11-20 15:20:00	0.933318	1490444000	0.00202477	9.76112	9.83946	4.34642	5.49304	0.136237	-4379	-3629
Cat-88: 20 measurements within 9 fragments													Mean δ18O*, ‰	± 1SD	± 2SD	n	IRMS δ18O, ‰	residual bias (rel. Cat–87), ‰
A7021	Cat-88@1	2024-11-20 15:27:00	0.936682	1472390000	0.00202654	10.6408	10.7144	4.34642	6.36795	0.125689	4237	-2811	6.25033	0.126701	0.253401	20	5.52	0.730329
A7021	Cat-88@02	2024-11-20 15:30:00	0.937464	1475286000	0.00202627	10.5062	10.5773	4.34642	6.2309	0.139409	1545	-2805
A7021	Cat-88@03	2024-11-20 15:33:00	0.938324	1487766000	0.00202637	10.5566	10.6253	4.34642	6.27887	0.177156	754	-2882
A7021	Cat-88@04	2024-11-20 15:37:00	0.937542	1485438000	0.0020263	10.5251	10.5915	4.34642	6.24505	0.15486	198	-2861
A7021	Cat-88@05	2024-11-20 15:43:00	0.936603	1468474000	0.00202652	10.6314	10.6929	4.34642	6.34647	0.145657	-1340	-2920
A7021	Cat-88@06	2024-11-20 15:47:00	0.935039	1472279000	0.00202676	10.752	10.8112	4.34642	6.46476	0.126198	-1830	-2904
A7021	Cat-88@07	2024-11-20 15:50:00	0.933944	1460373000	0.00202675	10.7471	10.8038	4.34642	6.45737	0.141226	-2343	-2995
A7021	Cat-88@08	2024-11-20 15:53:00	0.937386	1479500000	0.00202627	10.5067	10.561	4.34642	6.2146	0.182807	-3026	-2990
A7021	Cat-88@09	2024-11-20 16:00:00	0.932692	1455742000	0.00202652	10.6339	10.6834	4.34642	6.33697	0.145742	-4089	-2940
A7021	Cat-88@10	2024-11-20 16:04:00	0.937542	1464292000	0.00202622	10.4827	10.5299	4.34642	6.18346	0.137102	4166	-2788
A7021	Cat-88@11	2024-11-20 16:11:00	0.93676	1463243000	0.00202626	10.5037	10.546	4.34642	6.19961	0.288892	1658	-2787
A7021	Cat-88@12	2024-11-20 16:14:00	0.93676	1460683000	0.00202645	10.5969	10.6369	4.34642	6.29046	0.483695	673	-2949
A7021	Cat-88@13	2024-11-20 16:21:00	0.938481	1486874000	0.00202639	10.5685	10.6037	4.34642	6.25724	0.189919	133	-2849
A7021	Cat-88@14	2024-11-20 16:24:00	0.935508	1470461000	0.00202657	10.6558	10.6885	4.34642	6.34211	0.127468	-1216	-2798
A7021	Cat-88@15	2024-11-20 16:27:00	0.934882	1477453000	0.00202645	10.5964	10.6268	4.34642	6.28036	0.128624	-1797	-2989
A7021	Cat-88@16	2024-11-20 16:31:00	0.934178	1474077000	0.00202635	10.5496	10.5775	4.34642	6.23109	0.155223	-3129	-2922
A7021	Cat-88@17	2024-11-20 16:37:00	0.939028	1481024000	0.00202586	10.3022	10.3254	4.34642	5.97893	0.177509	4338	-2827
A7021	Cat-88@18	2024-11-20 16:41:00	0.937229	1475972000	0.00202586	10.3022	10.323	4.34642	5.97653	0.141444	511	-2837
A7021	Cat-88@19	2024-11-20 16:44:00	0.939733	1474458000	0.00202626	10.5047	10.523	4.34642	6.1766	0.201842	-1303	-2806
A7021	Cat-88@20	2024-11-20 16:48:00	0.939107	1471297000	0.00202621	10.4778	10.4937	4.34642	6.14727	0.14853	-1148	-2913
Cat-89: 20 measurements within 18 fragments													Mean δ18O*, ‰	± 1SD	± 2SD	n	IRMS δ18O, ‰	residual bias (rel. Cat–87), ‰
A7021	Cat-89@1	2024-11-20 16:54:00	0.937464	1488213000	0.00202529	10.0185	10.0296	4.34642	5.68317	0.109067	3732	-2031	5.55853	0.110388	0.220776	20	5.57	-0.0114654
A7021	Cat-89@02	2024-11-20 16:58:00	0.936916	1484133000	0.00202494	9.8464	9.85514	4.34642	5.50871	0.164939	3056	-2033
A7021	Cat-89@03	2024-11-20 17:01:00	0.936603	1477942000	0.00202498	9.86535	9.87169	4.34642	5.52526	0.120456	2689	-2020
A7021	Cat-89@04	2024-11-20 17:04:00	0.935821	1474055000	0.00202502	9.8843	9.88824	4.34642	5.54182	0.132389	2281	-2020
A7021	Cat-89@05	2024-11-20 17:11:00	0.93543	1482937000	0.00202487	9.80999	9.80913	4.34642	5.46271	0.174757	1828	-2041
A7021	Cat-89@06	2024-11-20 17:14:00	0.935665	1483077000	0.0020252	9.97157	9.96831	4.34642	5.62189	0.110537	865	-2050
A7021	Cat-89@07	2024-11-20 17:21:00	0.933083	1448360000	0.00202575	10.2484	10.2403	4.34642	5.89387	0.199594	335	-2151
A7021	Cat-89@08	2024-11-20 17:25:00	0.935821	1483490000	0.00202505	9.89926	9.8888	4.34642	5.54238	0.193311	-126	-2128
A7021	Cat-89@09	2024-11-20 17:31:00	0.934335	1475482000	0.00202495	9.84889	9.83363	4.34642	5.48721	0.192548	-576	-2132
A7021	Cat-89@10	2024-11-20 17:35:00	0.9341	1475622000	0.00202521	9.97955	9.96189	4.34642	5.61547	0.159373	-1541	-2128
A7021	Cat-89@11	2024-11-20 17:38:00	0.932144	1476786000	0.00202506	9.90575	9.88568	4.34642	5.53926	0.125256	-2034	-2142
A7021	Cat-89@12	2024-11-20 17:41:00	0.931205	1470246000	0.00202518	9.9631	9.94063	4.34642	5.59421	0.145169	-2419	-2179
A7021	Cat-89@13	2024-11-20 17:48:00	0.929875	1476280000	0.00202496	9.85538	9.82811	4.34642	5.48169	0.155617	-2751	-2224
A7021	Cat-89@14	2024-11-20 17:51:00	0.929719	1466899000	0.00202538	10.0643	10.0347	4.34642	5.68825	0.170451	-3124	-2230
A7021	Cat-89@15	2024-11-20 17:55:00	0.928389	1469559000	0.00202499	9.86884	9.83678	4.34642	5.49036	0.161818	-3536	-2260
A7021	Cat-89@16	2024-11-20 17:58:00	0.928937	1473531000	0.00202524	9.99202	9.95756	4.34642	5.61114	0.141692	-3950	-2302
A7021	Cat-89@17	2024-11-20 18:05:00	0.92659	1465724000	0.00202516	9.95562	9.91635	4.34642	5.56993	0.239007	-4340	-2241
A7021	Cat-89@18	2024-11-20 18:08:00	0.925181	1463162000	0.00202486	9.80551	9.76384	4.34642	5.41742	0.132445	-4809	-2286
A7021	Cat-89@19	2024-11-20 18:11:00	0.928154	1472232000	0.00202498	9.86685	9.82278	4.34642	5.47636	0.109036	-4050	-2342
A7021	Cat-89@20	2024-11-20 18:15:00	0.932457	1481226000	0.00202488	9.81249	9.76602	4.34642	5.4196	0.169182	3622	-2063
Cat-90: 20 measurements within 18 fragments													Mean δ18O*, ‰	± 1SD	± 2SD	n	IRMS δ18O, ‰	residual bias (rel. Cat–87), ‰
A7021	Cat-90@1	2024-11-20 18:22:00	0.930971	1494658000	0.00202433	9.5387	9.48744	4.34642	5.14101	0.152967	4418	-1370	5.4909	0.171471	0.342943	20	5.6	-0.1091
A7021	Cat-90@02	2024-11-20 18:29:00	0.931127	1479954000	0.00202478	9.76561	9.70955	4.34642	5.36312	0.308359	3960	-1477
A7021	Cat-90@03	2024-11-20 18:32:00	0.931205	1471531000	0.00202524	9.99601	9.93755	4.34642	5.59113	0.28444	3605	-1366
A7021	Cat-90@04	2024-11-20 18:35:00	0.93058	1475857000	0.00202587	10.3107	10.2498	4.34642	5.90341	0.249406	3049	-1422
A7021	Cat-90@05	2024-11-20 18:42:00	0.929563	1492500000	0.00202505	9.89826	9.8326	4.34642	5.48618	0.145652	2544	-1406
A7021	Cat-90@06	2024-11-20 18:45:00	0.928624	1486642000	0.00202529	10.018	9.94989	4.34642	5.60347	0.113047	1863	-1463
A7021	Cat-90@07	2024-11-20 18:49:00	0.929093	1493389000	0.00202515	9.94913	9.87867	4.34642	5.53225	0.133405	1462	-1471
A7021	Cat-90@08	2024-11-20 18:52:00	0.929171	1492416000	0.00202495	9.84889	9.77603	4.34642	5.42961	0.171031	1064	-1441
A7021	Cat-90@09	2024-11-20 18:59:00	0.929641	1494821000	0.00202529	10.018	9.94029	4.34642	5.59387	0.166552	585	-1432
A7021	Cat-90@10	2024-11-20 19:02:00	0.930658	1498883000	0.00202469	9.72222	9.64216	4.34642	5.29574	0.139441	113	-1549
A7021	Cat-90@11	2024-11-20 19:06:00	0.930267	1495103000	0.00202483	9.78905	9.70658	4.34642	5.36016	0.201758	-366	-1580
A7021	Cat-90@12	2024-11-20 19:09:00	0.926903	1492964000	0.0020253	10.0229	9.93808	4.34642	5.59166	0.162548	-1011	-1515
A7021	Cat-90@13	2024-11-20 19:16:00	0.930032	1497741000	0.00202515	9.94764	9.85797	4.34642	5.51155	0.162943	-1779	-1566
A7021	Cat-90@14	2024-11-20 19:19:00	0.928702	1492008000	0.00202525	9.99701	9.90494	4.34642	5.55852	0.167002	-2441	-1600
A7021	Cat-90@15	2024-11-20 19:26:00	0.927607	1487790000	0.00202506	9.90525	9.80838	4.34642	5.46196	0.134232	-3279	-1658
A7021	Cat-90@16	2024-11-20 19:29:00	0.925494	1481210000	0.0020256	10.1716	10.0723	4.34642	5.72587	0.178248	-3612	-1640
A7021	Cat-90@17	2024-11-20 19:36:00	0.925103	1486467000	0.00202538	10.0653	9.96127	4.34642	5.61484	0.149049	-4239	-1662
A7021	Cat-90@18	2024-11-20 19:39:00	0.921035	1480914000	0.00202494	9.8464	9.73994	4.34642	5.39351	0.212397	-4867	-1720
A7021	Cat-90@19	2024-11-20 19:43:00	0.926746	1501449000	0.00202469	9.72222	9.61336	4.34642	5.26694	0.152694	3878	-1377
A7021	Cat-90@20	2024-11-20 19:46:00	0.92925	1489037000	0.00202495	9.85089	9.73962	4.34642	5.3932	0.141218	2387	-1421
Cat–87_line_12 (as unknown)													Mean δ18O*, ‰	± 1SD	± 2SD	n
A7021	Cat-87_line_12@28	2024-11-20 14:57:00	0.935508	1476745000	0.0020251	9.9247	10.0198	4.34642	5.67341	0.157196	-3193	3120	5.70857	0.229115	0.45823	6
A7021	Cat-87_line_12@29	2024-11-20 16:07:00	0.934335	1499201000	0.00202593	10.3356	10.3804	4.34642	6.03394	0.190462	-3710	3036
A7021	Cat-87_line_12@30	2024-11-20 17:18:00	0.929797	1489258000	0.00202538	10.0623	10.0567	4.34642	5.71025	0.181176	-3875	3024
A7021	Cat-87_line_12@31	2024-11-20 18:25:00	0.925886	1479330000	0.00202577	10.2583	10.2047	4.34642	5.85824	0.276332	-2671	3217
A7021	Cat-87_line_12@32	2024-11-20 19:22:00	0.927372	1497153000	0.00202538	10.0618	9.96738	4.34642	5.62095	0.121513	-2259	3123
A7021	Cat-87_line_12@33	2024-11-20 20:33:00	0.923148	1463481000	0.00202494	9.8459	9.70104	4.34642	5.35462	0.129716	-1041	3238
Session #3A (Part 2): IMF was corrected using Cat–87_line_12 clinopyroxene (see maint text for details)
06JY31CPX: 20 measurements within 14 fragments													Mean δ18O*, ‰	± 1SD	± 2SD	n	IRMS δ18O, ‰	residual bias (rel. Cat–87), ‰
A7021	06JY31CPX@1	2024-11-20 21:24:00	0.936212	1437212000	0.00202757	11.1565		4.56312	6.59337	0.17531	2621	-174	6.37344	0.13232	0.264641	20	5.52	0.853443
A7021	06JY31CPX@02	2024-11-20 21:27:00	0.931675	1424828000	0.0020269	10.8214		4.56312	6.25824	0.176463	1860	-142
A7021	06JY31CPX@03	2024-11-20 21:30:00	0.931362	1421947000	0.00202734	11.0423		4.56312	6.47917	0.257763	1342	-128
A7021	06JY31CPX@04	2024-11-20 21:34:00	0.931127	1437254000	0.00202719	10.9665		4.56312	6.40337	0.218751	846	-174
A7021	06JY31CPX@05	2024-11-20 21:40:00	0.925338	1410395000	0.00202743	11.0882		4.56312	6.52505	0.293978	307	-243
A7021	06JY31CPX@06	2024-11-20 21:44:00	0.925416	1420015000	0.00202734	11.0428		4.56312	6.47967	0.262406	-125	-198
A7021	06JY31CPX@07	2024-11-20 21:47:00	0.923382	1422992000	0.00202698	10.8633		4.56312	6.30013	0.211009	-677	-312
A7021	06JY31CPX@08	2024-11-20 21:50:00	0.921114	1419146000	0.00202728	11.0124		4.56312	6.44925	0.172776	-1440	-230
A7021	06JY31CPX@09	2024-11-20 21:57:00	0.919001	1433282000	0.00202713	10.9391		4.56312	6.37594	0.225036	-1899	-263
A7021	06JY31CPX@10	2024-11-20 22:00:00	0.897482	1441588000	0.00202665	10.6972		4.56312	6.13407	0.132594	-2328	-309
A7021	06JY31CPX@11	2024-11-20 22:04:00	0.897546	1426600000	0.00202659	10.6683		4.56312	6.10514	0.229173	-2848	-319
A7021	06JY31CPX@12	2024-11-20 22:07:00	0.897338	1431492000	0.00202744	11.0887		4.56312	6.52555	0.255387	-3874	-313
A7021	06JY31CPX@13	2024-11-20 22:14:00	0.916029	1427539000	0.00202695	10.8448		4.56312	6.28168	0.179063	-4211	-352
A7021	06JY31CPX@14	2024-11-20 22:17:00	0.894986	1423897000	0.00202728	11.0094		4.56312	6.44625	0.239229	-4681	-389
A7021	06JY31CPX@15	2024-11-20 22:21:00	0.921426	1421072000	0.00202686	10.7994		4.56312	6.2363	0.181945	2242	-205
A7021	06JY31CPX@16	2024-11-20 22:24:00	0.920175	1418635000	0.0020269	10.8224		4.56312	6.25924	0.233716	1629	-150
A7021	06JY31CPX@17	2024-11-20 22:31:00	0.917045	1424064000	0.00202708	10.9116		4.56312	6.34851	0.290231	-871	-251
A7021	06JY31CPX@18	2024-11-20 22:34:00	0.897378	1415793000	0.00202716	10.9525		4.56312	6.3894	0.41966	-1550	-229
A7021	06JY31CPX@19	2024-11-20 22:38:00	0.895919	1426528000	0.00202715	10.9475		4.56312	6.38441	0.254715	-2441	-329
A7021	06JY31CPX@20	2024-11-20 22:41:00	0.892838	1391163000	0.00202737	11.0573		4.56312	6.49413	0.205815	-2984	-319
Cat-91: 20 measurements within 19 fragments													Mean δ18O*, ‰	± 1SD	± 2SD	n	IRMS δ18O, ‰	residual bias (rel. Cat–87), ‰
A7021	Cat-91@1	2024-11-20 22:48:00	0.897836	1444902000	0.00202569	10.2199		4.56312	5.65681	0.160278	4768	610	5.5036	0.12936	0.25872	20	5.47	0.033605
A7021	Cat-91@02	2024-11-20 22:54:00	0.921348	1489389000	0.00202484	9.79404		4.56312	5.23091	0.138561	4334	578
A7021	Cat-91@03	2024-11-20 22:58:00	0.897786	1486838000	0.00202546	10.1057		4.56312	5.5426	0.122541	3867	555
A7021	Cat-91@04	2024-11-20 23:01:00	0.897618	1485867000	0.00202493	9.84191		4.56312	5.27879	0.160192	3216	531
A7021	Cat-91@05	2024-11-20 23:08:00	0.896494	1455316000	0.00202522	9.98554		4.56312	5.42242	0.500835	2479	526
A7021	Cat-91@06	2024-11-20 23:11:00	0.894837	1455825000	0.00202559	10.1691		4.56312	5.60594	0.511223	1952	577
A7021	Cat-91@07	2024-11-20 23:14:00	0.895739	1454496000	0.00202565	10.1995		4.56312	5.63636	0.225536	1547	537
A7021	Cat-91@08	2024-11-20 23:18:00	0.897345	1466582000	0.00202518	9.9616		4.56312	5.39848	0.267429	1230	500
A7021	Cat-91@09	2024-11-20 23:24:00	0.894042	1478411000	0.00202523	9.98803		4.56312	5.42491	0.153859	637	439
A7021	Cat-91@10	2024-11-20 23:28:00	0.890123	1463753000	0.00202547	10.1092		4.56312	5.54609	0.177503	252	461
A7021	Cat-91@11	2024-11-20 23:31:00	0.892276	1472090000	0.00202561	10.1795		4.56312	5.61641	0.145673	-159	458
A7021	Cat-91@12	2024-11-20 23:34:00	0.890564	1470253000	0.00202524	9.99352		4.56312	5.4304	0.135461	-616	458
A7021	Cat-91@13	2024-11-20 23:41:00	0.891075	1461383000	0.00202591	10.3296		4.56312	5.76652	0.145027	-1457	408
A7021	Cat-91@14	2024-11-20 23:44:00	0.891019	1472372000	0.00202535	10.0474		4.56312	5.48426	0.174734	-1894	419
A7021	Cat-91@15	2024-11-20 23:48:00	0.890833	1465253000	0.00202517	9.95711		4.56312	5.39399	0.319632	-2562	404
A7021	Cat-91@16	2024-11-20 23:51:00	0.888789	1465865000	0.00202545	10.0987		4.56312	5.53562	0.193827	-3487	343
A7021	Cat-91@17	2024-11-20 23:58:00	0.889088	1470761000	0.00202531	10.0269		4.56312	5.46381	0.171874	-3890	318
A7021	Cat-91@18	2024-11-21 00:01:00	0.887211	1456655000	0.00202561	10.176		4.56312	5.61292	0.119912	-4308	310
A7021	Cat-91@19	2024-11-21 00:04:00	0.885895	1452262000	0.0020254	10.0758		4.56312	5.51268	0.160489	-4736	320
A7021	Cat-91@20	2024-11-21 00:11:00	0.889813	1469007000	0.0020254	10.0753		4.56312	5.51218	0.150818	-2088	355
Cat–87_line_01 (as unknown)													Mean δ18O*, ‰	± 1SD	± 2SD	n
A7021	Cat-87_line_01@28	2024-11-20 22:51:00	0.918375	1478454000	0.00202457	9.65939		4.56312	5.09626	0.150111	2512	-4492	5.26109	0.233093	0.466186	2
A7021	Cat-87_line_01@29	2024-11-21 00:08:00	0.89088	1458824000	0.00202523	9.98903		4.56312	5.42591	0.186043	516	-4532
Session #3B: IMF was corrected using Cat–87_line_12 clinopyroxene (see maint text for details)
Cat-98: 20 measurements within 11 fragments													Mean δ18O*, ‰	± 1SD	± 2SD	n	IRMS δ18O, ‰	residual bias (rel. Cat–87), ‰
A7021	Cat-98@1	2024-11-21 10:31:00	1.00388	1538754000	0.00202748	11.1116		4.6072	6.50441	0.156493	3628	2165	6.52291	0.150559	0.301117	20	5.49	1.03291
A7021	Cat-98@02	2024-11-21 10:34:00	1.00513	1552768000	0.00202719	10.968		4.6072	6.36078	0.151312	3218	2250
A7021	Cat-98@03	2024-11-21 10:37:00	1.00247	1549821000	0.00202769	11.2148		4.6072	6.60764	0.153608	914	2140
A7021	Cat-98@04	2024-11-21 10:41:00	1.00334	1541772000	0.00202763	11.1884		4.6072	6.58121	0.121465	575	2094
A7021	Cat-98@05	2024-11-21 10:47:00	1.00185	1544806000	0.0020278	11.2697		4.6072	6.6625	0.148201	-434	2041
A7021	Cat-98@06	2024-11-21 10:51:00	1.00138	1548503000	0.00202769	11.2138		4.6072	6.60664	0.144004	-1061	2016
A7021	Cat-98@07	2024-11-21 10:54:00	1.00013	1535906000	0.00202771	11.2253		4.6072	6.61811	0.143365	-1444	2032
A7021	Cat-98@08	2024-11-21 10:57:00	1.0013	1538663000	0.00202773	11.2343		4.6072	6.62709	0.165851	-2046	1993
A7021	Cat-98@09	2024-11-21 11:04:00	0.999736	1548015000	0.0020275	11.1201		4.6072	6.51289	0.142442	-2820	1930
A7021	Cat-98@10	2024-11-21 11:07:00	1.00013	1541226000	0.00202713	10.9351		4.6072	6.32787	0.142131	-3422	1928
A7021	Cat-98@11	2024-11-21 11:11:00	1.00021	1539100000	0.00202757	11.155		4.6072	6.54779	0.114476	-4298	1936
A7021	Cat-98@12	2024-11-21 11:14:00	1.00294	1536894000	0.00202681	10.778		4.6072	6.17078	0.141225	3685	2273
A7021	Cat-98@13	2024-11-21 11:21:00	1.00122	1548355000	0.00202702	10.8812		4.6072	6.27401	0.108229	-578	2019
A7021	Cat-98@14	2024-11-21 11:24:00	1.00099	1542805000	0.00202733	11.0378		4.6072	6.4306	0.166623	-1528	1975
A7021	Cat-98@15	2024-11-21 11:28:00	0.997546	1530951000	0.00202769	11.2158		4.6072	6.60864	0.143534	-2212	2000
A7021	Cat-98@16	2024-11-21 11:31:00	0.997233	1537289000	0.00202758	11.1605		4.6072	6.55328	0.146044	-2996	1924
A7021	Cat-98@17	2024-11-21 11:38:00	0.998015	1604107000	0.00202736	11.0528		4.6072	6.44556	0.558692	-3501	1854
A7021	Cat-98@18	2024-11-21 11:45:00	1.07163	1610796000	0.00202811	11.4258		4.6072	6.81859	0.159844	-4459	1938
A7021	Cat-98@19	2024-11-21 11:48:00	1.05489	1609362000	0.00202765	11.1949		4.6072	6.58769	0.136023	-1606	2034
A7021	Cat-98@20	2024-11-21 11:51:00	1.04386	1592455000	0.0020277	11.2193		4.6072	6.61213	0.111056	-2342	1956
Cat-100: 20 measurements within 17 fragments													Mean δ18O*, ‰	± 1SD	± 2SD	n	IRMS δ18O, ‰	residual bias (rel. Cat–87), ‰
A7021	Cat-100@1	2024-11-21 11:58:00	1.03025	1609332000	0.00202567	10.2095		4.6072	5.60225	0.158333	4555	2868	5.55585	0.109407	0.218814	20	5.56	-0.00415103
A7021	Cat-100@02	2024-11-21 12:01:00	1.02649	1586242000	0.00202534	10.0434		4.6072	5.43619	0.152584	4110	2865
A7021	Cat-100@03	2024-11-21 12:05:00	1.0236	1605909000	0.00202542	10.0838		4.6072	5.47658	0.132725	3662	2843
A7021	Cat-100@04	2024-11-21 12:08:00	1.01906	1592022000	0.00202549	10.1187		4.6072	5.51149	0.134639	2571	2792
A7021	Cat-100@05	2024-11-21 12:15:00	1.01272	1596896000	0.0020257	10.2224		4.6072	5.61522	0.149659	1912	2804
A7021	Cat-100@06	2024-11-21 12:18:00	1.01241	1585782000	0.00202559	10.1666		4.6072	5.55936	0.125877	1550	2669
A7021	Cat-100@07	2024-11-21 12:22:00	1.01061	1576565000	0.00202578	10.2648		4.6072	5.65761	0.136228	388	2698
A7021	Cat-100@08	2024-11-21 12:25:00	1.01061	1590359000	0.00202538	10.0638		4.6072	5.45663	0.146502	-67	2639
A7021	Cat-100@09	2024-11-21 12:32:00	1.00787	1578595000	0.00202543	10.0898		4.6072	5.48256	0.148569	-812	2600
A7021	Cat-100@10	2024-11-21 12:35:00	1.00646	1574933000	0.00202548	10.1112		4.6072	5.50401	0.156482	-1301	2590
A7021	Cat-100@11	2024-11-21 12:38:00	1.00701	1583060000	0.00202544	10.0962		4.6072	5.48905	0.152086	-1950	2563
A7021	Cat-100@12	2024-11-21 12:42:00	1.00623	1576346000	0.00202553	10.1386		4.6072	5.53144	0.170585	-2590	2489
A7021	Cat-100@13	2024-11-21 12:48:00	1.00631	1583134000	0.00202557	10.1581		4.6072	5.55089	0.130516	-3450	2467
A7021	Cat-100@14	2024-11-21 12:52:00	1.00592	1574787000	0.00202575	10.2503		4.6072	5.64315	0.149539	-4072	2387
A7021	Cat-100@15	2024-11-21 12:55:00	1.00341	1565908000	0.00202614	10.4433		4.6072	5.83615	0.163177	-4727	2385
A7021	Cat-100@16	2024-11-21 13:02:00	1.00075	1553083000	0.00202555	10.1461		4.6072	5.53892	0.119716	-5204	2405
A7021	Cat-100@17	2024-11-21 13:05:00	0.998797	1551333000	0.00202558	10.1631		4.6072	5.55587	0.113331	-6042	2322
A7021	Cat-100@18	2024-11-21 13:12:00	1.00263	1563725000	0.00202529	10.017		4.6072	5.40975	0.156551	-244	2610
A7021	Cat-100@19	2024-11-21 13:19:00	1.00396	1575280000	0.00202542	10.0838		4.6072	5.47658	0.140432	-1486	2516
A7021	Cat-100@20	2024-11-21 13:22:00	0.998171	1563921000	0.00202603	10.3905		4.6072	5.78328	0.180583	-5849	2322
Cat–87_line_01 (as unknown)													Mean δ18O*, ‰	± 1SD	± 2SD	n
A7021	Cat-87_line_01@30	2024-11-21 10:20:00	1.00091	1603078000	0.0020256	10.1731		4.6072	5.56585	0.14824	135	-4478	5.49029	0.106849	0.213698	2
A7021	Cat-87_line_01@32	2024-11-21 13:08:00	1.00357	1595596000	0.0020253	10.0219		4.6072	5.41474	0.143913	-816	-4527
A7021	Cat-87_line_01@31	2024-11-21 11:41:00	1.11145	1726060000	0.00202623	10.4887				0.125011	-320	-4523
a: In Session #3A (Part 1), instrumental drift correction was conducted using the Cat–87_line_01 data.
b: IMF-corrected values using Cat–87 (IRMS δ18O = 5.53‰).
Data for the Cat–87 reference material
Epoxy mount ID	Analysis ID	Date	Primary intensity, nA	Intensity O16	O18/O16	measured δ18O, ‰	drift-corrected δ18O, ‰a	IMF	δ18O*, ‰b	± 2SE (internal error)	X position, μm	Y position, μm
Session #3A (Part 1)													± 1SD	± 2SD	n
A7021	Cat-87_line_01@1	2024-11-20 13:53:00	0.980726	1557581000	0.00202474	9.74666	9.88739	4.34642	5.54097	0.146413	2489	-4541	0.123597	0.247194	25
A7021	Cat-87_line_01@2	2024-11-20 13:56:00	0.974076	1549972000	0.00202473	9.73918	9.87751	4.34642	5.53109	0.198916	2155	-4471
A7021	Cat-87_line_01@3	2024-11-20 14:13:00	0.954127	1544738000	0.00202453	9.64143	9.76777	4.34642	5.42135	0.139428	1806	-4481
A7021	Cat-87_line_01@4	2024-11-20 14:30:00	0.947321	1527803000	0.00202482	9.78356	9.8979	4.34642	5.55148	0.140766	1055	-4496
A7021	Cat-87_line_01@5	2024-11-20 14:46:00	0.942392	1526101000	0.00202468	9.71474	9.81708	4.34642	5.47066	0.134657	630	-4587
A7021	Cat-87_line_01@6	2024-11-20 15:07:00	0.939498	1521504000	0.00202504	9.89178	9.97972	4.34642	5.6333	0.158406	228	-4505
A7021	Cat-87_line_01@7	2024-11-20 15:23:00	0.939576	1521561000	0.00202514	9.94215	10.0181	4.34642	5.67167	0.150258	-234	-4506
A7021	Cat-87_line_01@8	2024-11-20 15:40:00	0.937699	1526943000	0.00202523	9.99102	10.055	4.34642	5.70854	0.131885	-747	-4538
A7021	Cat-87_line_01@9	2024-11-20 15:57:00	0.93895	1523384000	0.00202507	9.91073	9.96267	4.34642	5.61625	0.133791	-1194	-4558
A7021	Cat-87_line_01@10	2024-11-20 16:17:00	0.937777	1526007000	0.00202482	9.78306	9.8206	4.34642	5.47418	0.135243	-1537	-4457
A7021	Cat-87_line_01@11	2024-11-20 16:34:00	0.936838	1530120000	0.00202454	9.64742	9.67295	4.34642	5.32653	0.156804	-1985	-4520
A7021	Cat-87_line_01@12	2024-11-20 16:51:00	0.937699	1529670000	0.00202451	9.63146	9.64499	4.34642	5.29857	0.112948	-2576	-4625
A7021	Cat-87_line_01@13	2024-11-20 17:08:00	0.93496	1522620000	0.0020251	9.9242	9.92573	4.34642	5.57931	0.137036	-2968	-4621
A7021	Cat-87_line_01@14	2024-11-20 17:28:00	0.933396	1511155000	0.00202475	9.74915	9.73629	4.34642	5.38987	0.147871	-3098	-4620
A7021	Cat-87_line_01@15	2024-11-20 17:45:00	0.931362	1516621000	0.00202493	9.83742	9.81256	4.34642	5.46614	0.158342	-3526	-4631
A7021	Cat-87_line_01@16	2024-11-20 18:01:00	0.929406	1504419000	0.00202523	9.98803	9.95117	4.34642	5.60475	0.167063	-3649	-4642
A7021	Cat-87_line_01@17	2024-11-20 18:18:00	0.927059	1492249000	0.00202546	10.1027	10.0539	4.34642	5.70745	0.173936	-3695	-4504
A7021	Cat-87_line_01@18	2024-11-20 18:39:00	0.92745	1491886000	0.00202545	10.0982	10.035	4.34642	5.68856	0.14933	-3168	-4487
A7021	Cat-87_line_01@19	2024-11-20 18:56:00	0.929563	1505993000	0.0020248	9.77459	9.69932	4.34642	5.3529	0.146813	-2681	-4474
A7021	Cat-87_line_01@20	2024-11-20 19:12:00	0.927841	1512675000	0.00202531	10.0304	9.94316	4.34642	5.59674	0.152701	-2267	-4601
A7021	Cat-87_line_01@21	2024-11-20 19:32:00	0.927372	1513286000	0.00202538	10.0638	9.96217	4.34642	5.61575	0.127992	-1701	-4573
A7021	Cat-87_line_01@22	2024-11-20 19:49:00	0.930501	1508095000	0.002025	9.87483	9.76116	4.34642	5.41474	0.239056	-1333	-4545
A7021	Cat-87_line_01@23	2024-11-20 20:06:00	0.928467	1496230000	0.00202501	9.87782	9.75215	4.34642	5.40573	0.183951	-890	-4504
A7021	Cat-87_line_01@24	2024-11-20 20:23:00	0.92659	1489204000	0.00202558	10.1616	10.0239	4.34642	5.67749	0.482951	-468	-4585
A7021	Cat-87_line_01@25	2024-11-20 20:43:00	0.926199	1478190000	0.00202526	10.0045	9.85242	4.34642	5.506	0.306773	81	-4606
Session #3A (Part 2)													± 1SD	± 2SD	n
A7021	Cat-87_line_12@2	2024-11-20 21:37:00	0.927998	1454269000	0.00202548	10.1112		4.56312	5.54809	0.181888	3949	3581	0.127189	0.254378	11
A7021	Cat-87_line_12@3	2024-11-20 21:54:00	0.923695	1461948000	0.00202516	9.95562		4.56312	5.39249	0.19912	3574	3457
A7021	Cat-87_line_12@4	2024-11-20 22:11:00	0.897888	1434114000	0.00202542	10.0818		4.56312	5.51867	0.299617	3483	3451
A7021	Cat-87_line_12@5	2024-11-20 22:28:00	0.920644	1463089000	0.0020257	10.2219		4.56312	5.6588	0.227153	3210	3560
A7021	Cat-87_line_12@6	2024-11-20 22:44:00	0.89646	1434742000	0.0020259	10.3227		4.56312	5.75954	0.171483	3140	3475
A7021	Cat-87_line_12@7	2024-11-20 23:04:00	0.896828	1453104000	0.00202509	9.91821		4.56312	5.35509	0.460822	2687	3437
A7021	Cat-87_line_12@8	2024-11-20 23:21:00	0.892808	1448080000	0.00202541	10.0783		4.56312	5.51517	0.264353	2642	3550
A7021	Cat-87_line_12@9	2024-11-20 23:38:00	0.893423	1451500000	0.00202548	10.1117		4.56312	5.54859	0.259666	1961	3350
A7021	Cat-87_line_12@10	2024-11-20 23:54:00	0.892225	1456240000	0.00202535	10.0514		4.56312	5.48824	0.155881	2069	3362
A7021	Cat-87_line_12@11	2024-11-21 00:15:00	0.892541	1454874000	0.00202514	9.94415		4.56312	5.38102	0.154969	1647	3334
A7021	Cat-87_line_12@12	2024-11-21 00:31:00	0.890838	1444238000	0.00202571	10.2274		4.56312	5.66429	0.165014	1460	3309
Session #3B													± 1SD	± 2SD	n
A7021	Cat-87_line_12@33a	2024-11-21 09:16:00	0.981039	1534764000	0.00202549	10.1192		4.6072	5.51199	0.16067	788	3306	0.107308	0.214615	17
A7021	Cat-87_line_12@33b	2024-11-21 09:20:00	0.986359	1551192000	0.00202531	10.0289		4.6072	5.42172	0.143718	330	3356
A7021	Cat-87_line_12@13	2024-11-21 09:33:00	0.994729	1566663000	0.00202558	10.1621		4.6072	5.55488	0.138419	972	3293
A7021	Cat-87_line_12@14	2024-11-21 09:50:00	0.996294	1569907000	0.0020257	10.2229		4.6072	5.61572	0.152176	893	3296
A7021	Cat-87_line_12@15	2024-11-21 10:07:00	1.00067	1585690000	0.00202539	10.0703		4.6072	5.46312	0.138815	370	3274
A7021	Cat-87_line_12@16	2024-11-21 10:27:00	1.00013	1569580000	0.00202578	10.2638		4.6072	5.65661	0.176077	284	3244
A7021	Cat-87_line_12@17	2024-11-21 10:44:00	1.00177	1574035000	0.0020254	10.0713		4.6072	5.46411	0.156777	-126	3292
A7021	Cat-87_line_12@18	2024-11-21 11:01:00	1.00114	1569189000	0.00202541	10.0788		4.6072	5.47159	0.142889	-204	3267
A7021	Cat-87_line_12@19	2024-11-21 11:18:00	1.00044	1575036000	0.00202515	9.94963		4.6072	5.34243	0.153007	-652	3297
A7021	Cat-87_line_12@20	2024-11-21 11:34:00	0.999892	1570195000	0.00202559	10.1671		4.6072	5.55986	0.147963	-726	3292
A7021	Cat-87_line_12@21	2024-11-21 11:55:00	1.034	1621880000	0.00202593	10.3381		4.6072	5.73092	0.160873	-1643	3276
A7021	Cat-87_line_12@22	2024-11-21 12:11:00	1.01616	1588584000	0.00202526	10.003		4.6072	5.39579	0.155827	-1710	3267
A7021	Cat-87_line_12@23	2024-11-21 12:28:00	1.00905	1580321000	0.0020259	10.3217		4.6072	5.71446	0.125798	-2091	3185
A7021	Cat-87_line_12@24	2024-11-21 12:45:00	1.00639	1572671000	0.00202554	10.1431		4.6072	5.53593	0.164974	-2165	3164
A7021	Cat-87_line_12@25	2024-11-21 12:58:00	1.00584	1590713000	0.00202542	10.0818		4.6072	5.47459	0.128825	-2595	3146
A7021	Cat-87_line_12@26	2024-11-21 13:15:00	1.00232	1577909000	0.00202548	10.1122		4.6072	5.50501	0.15066	-2677	3119
A7021	Cat-87_line_12@27	2024-11-21 13:25:00	1.00013	1569369000	0.00202565	10.1985		4.6072	5.59128	0.104463	-2785	3150
a: In Session #3A (Part 1), instrumental drift correction was conducted using the Cat–87_line_01 data.
b: IMF-corrected values using Cat–87 (IRMS δ18O = 5.53‰).
